# Supplementary material
Source: PubMed Central journal article supplement (PMC5393201)
Supplement: pnas.1609758114.sapp.pdf [file pnas.1609758114.sapp.pdf]

**Cell culture**

A172, T98G, human embryonic kidney cell 293T (HEK293T), MDA-MB-231, T-47D, U87-MG (U87), U138-MG (U138), U251-MG (U251), and U343-MG (U343) cell lines were cultured in Dulbecco's Modified Eagle Medium (DMEM, Biowest, L0104-500). SKBR3 cells were cultured in DMEM supplemented with glutamine. OCI-LY3, SU-DHL-4 and DBTRG-05MG (DBTRG) cell lines were maintained in Roswell Park Memorial Institute medium 1640 (RPMI-1640, Biowest, L0495-500). GBM primary explant cell lines DA66, JM94, SN172, and YK163 (29) were maintained in DMEM/F-12, GlutaMAX™ medium (Gibco, 10565-042). All culture media were supplemented with 10% fetal bovine serum (FBS, Biowest, S1810-500) and 1% penicillin-streptomycin (Gibco, 15140-122), and cells were kept in 5% CO<sub>2</sub> in a humidified incubator at 37°C. For all established GBM cell lines, cells were maintained within 15 passages after cell ID authenticated by short tandem repeat analysis with the Geneprint 10 System Kit (Promega, B9510) in July 2014.

**Cell viability (MTT) assay**

Two thousand of GBM cells were seeded into 96-well plates at day 0 and cultured for indicated time course. For drug studies, the original medium was replaced with either fresh complete medium or medium containing indicated drugs at day 1. For shRNA library screening, U87 cells stably expressing indicated shRNAs were seeded at day 0, and assayed at day 1 and day 5. To measure cell proliferation, 10 µL of MTT (3-(4,5-Dimethylthiazol-2-yl)-2,5-diphenyltetrazolium bromide, Sigma Aldrich) was added into each well and

incubated for 3 hours followed by removal of medium and addition of 100  $\mu$ L of MTT STOP solution (2% acetic acid, 16% SDS, 42% dimethylformamide). The plate was read with the absorbance at 570 nm. Data represent mean  $\pm$  SD.

### **Long-term cell proliferation assay**

Cells were transfected with indicated siRNAs and seeded into 6-well plates at 2,000 cells/well 24-hour post-transfection. After gamma-radiation treatment, cells were kept in incubator for 10 days. Cells were then stained with crystal violet which was subsequently extracted by MTT STOP solution and measured at OD 540 nm.

### **BrdU incorporation assay**

BrdU Cell Proliferation Assay Kit (BioVision Inc.) was used according to the manufacturer's instruction. Briefly, indicated cells were seeded into 96-well plate at 5,000 cells/well. Next day, BrdU solution was added into each assay well and incubated at 37°C for 3 hours. BrdU incorporated by proliferating cells was detected by an enzyme-linked immunosorbent assay.

### **Caspase-Glo 3/7 assay**

To monitor the cellular Caspase 3/7 activity, Caspase-Glo 3/7 Assay (Promega) was applied according to the manufacturer's instruction. Cells were seeded into a white-walled 96-well plate at 5,000-10,000 cells/well. Luminescence of each sample was detected by luminometer. Culture medium without cells was determined as background.

### **Cell cycle analysis**

Cells were trypsinized, wash and fixed in 70% ethanol at 4°C. After fixation, cells were washed twice with cold PBS and resuspended in propidium iodide (PI) solution containing RNase. Samples were then incubated at 37°C for 30 min prior to measurement by LSR II Flow Cytometer System (BD Biosciences). Cell cycle distribution was analyzed by FlowJo.

### **Senescence-associated $\beta$ -galactosidase (SA- $\beta$ -Gal) activity assay**

Cellular senescence was measured by the senescence-associated  $\beta$ -galactosidase (SA- $\beta$ -Gal) activity assay (BioVision Inc.) following the manufacturer's instruction. Cells were photographed (200X total magnification) using an Eclipse TE2000 inverted microscope (Nikon). The percentage of SA- $\beta$ -gal positive cells/field was counted in 3-5 fields/well.

### **Soft agar colony formation assay**

Soft agar colony formation assay was performed to evaluate the anchorage-independent growth of GBM cells. Basal layer solution (0.4% agarose in DMEM with 10% FBS) was added into 12-well plate and solidified before use. Appropriate number of cells were mixed with 500  $\mu$ L of top layer solution (0.4% low melting agarose in DMEM with 10% FBS) and spread over the basal layer. After solidified in 4°C, 1 mL of feeder medium was added into each well. The plates were kept in 37°C in a 5% CO<sub>2</sub> incubator before analysis. Colonies were stained using 0.01% crystal violet in 4% paraformaldehyde/PBS, and then photographed under a dissection microscope.

### **siRNA transfection**

All SMART-pool siRNAs were purchased from Dharmacon (SI Appendix Table S4). siRNAs were transfected using RNAiMAX (Life Technologies,

13778-150) according to the manufacturer's instructions. Briefly, siRNAs and RNAiMAX were diluted individually with OPTI-MEM medium for 5 min, and mixed together for 20 min before adding into cells. Culture media were refreshed 6 hours after transfection.

### **Plasmids and reagents**

pBABE-puro vector based GFP, GFP-BCL6, GFP-BCL6-ZF, Flag-BCL6 and Flag-BCL6<sup>N21K H116A</sup> were generated by standard molecular cloning protocol. pLXSN-Empty, pLXSN-AXL and pLXSN-AXL-DN (dominant-negative AXL) were kindly provided by Dr Axel Ullrich (38) at Max Planck Institute for Biochemistry, Germany. shRNAs targeting ZBTB family genes, AKT1, MYC and AXL were constructed based on pLKO.1 lentiviral vector, and all of the inserted sequences were listed in the Supplemental Table 1. The inducible BCL6 shRNA vectors were generated based on a Tet-pLKO-puro vector (Addgene plasmid # 21915) (36), by using the same insert sequences from the pLKO.1 vectors. sgRNAs targeting BCL6 (SI Appendix Table S5) were introduced into pLenti-CRISPR v2 vector (Addgene plasmid # 52961) (30). pCAG-pBase, pCAG-TagBFP2-HA-nls PB, and pCAG-TagBFP2-V5-nls were reported previously (31). miR-E "Multi-sensor" was constructed by inserting various shRNA target sequences into 3'UTR of EGFP in pUB-EGFP vector (32). The target sequences of pCAG-miR-E based shRNA vectors were listed in SI Appendix Table S6. To generate expression vectors for electroporation in this study, a WPRE-polyA element was introduced firstly into pUB-EGFP-KrasG12V PB vector to create pUB-EGFP-KrasG12V-WPRE PB vector; bicistronic pUB-EGFP-KrasG12V-WPRE-pCAG-shBcl6.275 PB vector was subsequently generated by PCR addition of pUB-EGFP-KrasG12V-WPRE

fragment into pCAG-miR-E Bcl6.275 PB vector. To generate pEf1a-BCL6, BCL6 coding sequence was PCR-amplified (adding a stop codon and removing the ERD) from BCL6-ERD (a generous gift of Dr Art Shaffer) and infused into *NruI* and *NheI* cut pEf1a-HA-nls-BglA PB. pEf1a-BCL6shResistant was subsequently constructed to convert the shBcl6.275 targeting sequence (gaccagttgaaatgcaacctta) to silent mutations (gaTcaAttAaaGtgTaaTctAa). Small-molecule inhibitors and other reagents were listed in SI Appendix Table S7.

### **Virus preparation and stable line generation**

Retroviral and lentiviral particles were prepared in HEK293T. For retroviral particle preparation, pBABE or pLXSN based overexpression vector and package vector (Env and Gagpol) were co-transfected using TransIT®-LT1 Transfection Reagent (Mirus). For lentiviral particle production, shRNA/sgRNA constructs and MISSION packaging plasmid mix (Sigma) were co-transfected using Mirus. Media were replaced 6 hours after transfection and the supernatants containing viral particles were collected 48 and 72 hours after transfection and filtered (pore size 0.45 µm). To generate stable cell lines, virus-containing media were premixed with polybrene (final concentration 8 µg/mL) and allowed to infect the cells for 48 hours before puromycin or G418 selection. Single clones of isogenic JM94 cells were generated by limiting dilution and expansion.

### **Xenograft assay**

Indicated amount of GBM cells were mixed with 100 µL of Matrigel/PBS solution (volume ration, 1:1) (BD Biosciences) and injected subcutaneously on

the upper flanks of NSG mice. Regarding in vivo drug assay, Empty Peptide (GRRRQRRKKRGGGDIMGEWGNEIFGAIAGFLG, all-D version, >95% purity) and RI-BPI (GRRRQRRKKRGGGRGIEHISRGGDIMGEWGNEIFGAIAGFLG, all-D version, >95% purity) were ordered both from Cellmano Biotech Ltd, China, and Bio-Synthesis, Inc., USA. One week after tumor implantation, each peptide was freshly dissolved in PBS and administered intraperitoneally (50 mg/kg/day for 4 days). Two weeks after treatment, mice were sacrificed and analyzed. All murine xenograft experiments were in compliance with ethical regulations of the Institutional Animal Care and Use Committee of National University of Singapore.

### **Electroporation and mouse glioma model**

Mouse glioma models were generated by electroporation using wildtype CD-1 mice in accordance with the Institutional Animal Care and Use Committee of Cedars-Sinai Medical Center. Postnatal day 2 pups were placed on ice until unresponsive to tail pressure. Plasmid DNA mix (~4 µg) in Tris-EDTA buffer was injected into the left lateral ventricle of the brain, leaving the right ventricle unaffected as a control. Then, Tweezertrodes were used to electroporate with 5 pulses of 120 V (50 ms; separated by 950 ms) generated with the ECM 830 BTX Electroporator (Harvard Apparatus).

Pathologically, these KrasG12V models developed high-grade gliomas which had been characterized as astrocytoma, oligoastrocytoma, oligodendroglioma and glioblastoma by neuropathologist (31).

### **Immunohistochemistry**

Freshly isolated xenograft samples were fixed with 4% paraformaldehyde in PBS overnight at 4°C. On the next day, samples were washed with ice-cold PBS twice and then dehydrated by serial ethanol immersion (50%, 70%, 80%, 90% ethanol once and 100% ethanol twice for 15 min each on ice). Samples were then incubated with ethanol: butanol (4:1, 3:2, 2:3 1:4) once and 100% butanol twice for 15 min each at room temperature. Samples were next transferred to butanol:paraffin (1:4) for 1 hour, then to 100% paraffin for 3 hours in 62°C oven. Tissue sections (5 µm) were prepared by standard protocol. During the staining procedure, tissue sections were de-waxed by xylene (2X 10 min), 100% ethanol (1X 10 min), 100% ethanol (1X 5 min), 90% ethanol (1X 5 min), 80% ethanol (1X 5 min), 70% ethanol (1X 5 min), and Milli-Q water (3X 5 min). For antigen retrieval, sections were incubated in retrieval solution (DAKO, S1699) at 100°C for 20 min and cooled to room temperature for 20 min. Slides were washed in PBS (3X 5 min). Endogenous peroxidase activity was blocked by 1% H<sub>2</sub>O<sub>2</sub> incubation for 15 min at room temperature. Slides were washed in PBST (3X 5 min) and then incubated with blocking buffer (3% BSA in PBST) for 1 hour at room temperature. Primary antibodies against AXL (Sigma, HPA037422) and Ki67 (DAKO, MIB-1) were diluted in the blocking buffer and incubated at 4°C overnight. Slides were washed in PBST (3X 5 min) and incubated with secondary antibody (DAKO, P026002/ P021702) for 1 hour at room temperature. Slides were washed in PBST (3X 5 min). DAB (3, 3'-Diaminobenzidine) substrate was used to detect the bound peroxidase on the slides. Counter-staining was performed with Mayer's hematoxylin solution (DAKO, S3309) and washed under tap water followed with dehydration by incubation with 70% ethanol (1X 30 sec), 80%

ethanol (1X 45 sec), 90% ethanol (1X 1 min), 100% ethanol (2X 1 min), xylene (2X 5 min). Slides were finally mounted by Eukitt quick-hardening mounting medium (Sigma).

Tissue microarrays (TMA), which were from Dr William Yong (UCLA) and US Biomax, Inc., were stained with antibody against human BCL6 (DAKO, PG-B6p) and scored independently by two pathologists. The BCL6 protein level was quantified according the criteria described below. The percentage of BCL6-positive cells was scaled as: 0% (score=0), 1-10% (score=1), 10-50% (score=2), and >50% (score=3). The intensity of BCL6 staining was classified into 4 categories: negative (score=0), weak (score=1), moderate (score=2) and strong (score=3). The percentage score and intensity score were then multiplied to provide a single value for each core on the slides. Mean value of multiple cores representing each case were calculated, and was finally graded as 0 (value=0), 1 ( $0 < \text{value} < 3$ ), 2 ( $3 \leq \text{value} < 6$ ) or 3 ( $6 \leq \text{value} \leq 9$ ), for statistical analysis.

### **Mouse tissue preparation and immunofluorescence**

After perfusion, mouse brains were dissected and immersion fixed in 4% paraformaldehyde overnight at 4°C. On the next day, tissue was washed in PBS, embedded in 4% low melting agarose and cut on a vibratome into 70 µm free-floating sections. Tissue sections were then washed in PBS (3X 5 min) at room temperature and incubated with primary antibody (diluted in PBST and 5% normal donkey serum) overnight at 4°C. On the next day, tissue was washed in PBS (3X 5 min) at room temperature and incubated with fluorescent-conjugated secondary antibodies (Jackson Immunology) at room



temperature for 1 hour. Then, tissue sections were washed in PBS (3X 5 min) and mounted on slides.

### **Imaging processing and quantification**

Confocal imaging was conducted on a Nikon A1R confocal microscope. The automated stitching function of Nikon Elements was used for hemi brain section images to create seamless merged images from multiple image fields. Quantification of immunostaining was done independently at 10X magnification using ImageJ software by two investigators. Percentage of Ki67<sup>+</sup> cells in TagBFP<sup>+</sup> cells was determined by calculating the number of Ki67 positive cells in 100 EGFP<sup>+</sup> TagBFP<sup>+</sup> cells at the ventral margin of each tumor (N=3 per group).

### **Cell lysate preparation and western blot assay**

Cells were placed in lysis buffer (50 mM Tris pH 8.0, 0.3 M NaCl, 5% glycerol, 0.1% NP-40, 0.1 mM EDTA) with freshly added 1 mM DTT, 1 mM phenylmethylsulfonyl fluoride, 1X protease inhibitor cocktail (Roche, 4693116001), 1X Phosphatase inhibitor cocktail (Roche, 04906845001), 1 mM magnesium chloride and Benzonase nuclease (1:500, Novagen, 70746-3) for 20 min on ice. Bradford assay was used for protein quantification. Western blot analysis was conducted following standard protocol with indicated antibodies listed in SI Appendix Table S7.

### **Phospho-Human RTK Array**

Phospho-Human RTK Array (R&D, ARY001B) was used according to the manufacturer's instruction. Briefly, cells lysates were prepared 72 hours post-siRNA transfection and incubated overnight with the membrane pre-spotted

with antibodies against different RTKs in cold room. The membrane was then washed and incubated with pan anti-phospho-tyrosine antibody conjugated to horseradish peroxidase (HRP) at room temperature for 1 hour before visualization using chemiluminescent detection reagents.

### **Chromatin immunoprecipitation (ChIP) and ChIP-qPCR**

ChIP was performed by following a standard protocol. Briefly, cells were fixed with 1% formaldehyde for 10 min at room temperature and neutralized by glycine (final concentration 0.125 M). Cells were washed 3 times by cold PBS, collected by spinning down at 1,500 rpm for 5 min, and re-suspended in nuclear extraction buffer to enrich nuclei. Nuclei were subjected to SDS lysis buffer for 10 min on ice and sonicated by Bioruptor to achieve genomic fragments around 500 base pairs. After sonication, cell debris was removed by centrifugation at 13,000 rpm for 10 min, supernatant was then diluted and pre-cleared by incubation with the IgG and Dynabeads Protein A+G (Invitrogen) for 90 min in 4°C. ChIP was performed using BCL6 antibody (Cell Signaling Technology, 5650S), NCoR antibody (Bethyl Laboratories, Inc., A301-145A) and IgG control (Abcam, ab46540) and followed with increasing stringency washes with cold low salt wash buffer, high salt wash buffer, LiCl wash buffer and TE buffer. Bound DNA was eluted by the buffer containing 1% SDS and 0.1 M NaHCO<sub>3</sub>, reverse-crosslinked overnight at 65°C, purified by QIAquick PCR purification kit (Qiagen, 28106) followed by ChIP-qPCR analysis. ChIP-qPCR primers were listed in SI Appendix Table S8.

### **RNA preparation, cDNA microarray and qRT-PCR analysis**

Total RNA was prepared by using RNeasy Kit (Qiagen, 74106) according to the instruction. Microarray was performed using the HumanHT-12 v4 Expression BeadChip Kit (Illumina). After DNase treatment, total RNA was used for cDNA library construction by using RevertAid RT Reverse Transcription Kit (Life technology, K1691), and qPCR analysis was performed with Kapa SYBR fast qPCR Master Mix (KAPA Biosystems, KK4602) on a 7500 Real-time PCR System (Applied Biosystems). QRT-PCR primers were listed in SI Appendix Table S9.

Raw data exported from BeadStudio were read into R environment using beadarray Bioconductor package (34) and quantile normalized followed by log<sub>2</sub> transformation. Differential expressed genes (DEGs) were identified using Limma Bioconductor package while correcting for differences in arrayweights (35). Resulting p-values were adjusted for false discovery rates (FDRs). Probesets with FDR no more than 0.05 were considered as DEGs and subsequently used for pathway enrichment analysis through ConsensusPathDB (<http://www.consensuspathdb.org>). All measured genes on microarray were used as background.

Regarding the analysis of GSE4290 and GSE4536, raw microarray data (CEL files) were downloaded from NCBI GEO and processed using affy Bioconductor package (26). Raw data were normalized based on a robust multi-array average procedure (27), filtered by mas5calls, and then used for differential expression analysis with Limma package. P-values were corrected for FDR. Heat maps were generated by scaling normalized expression of probesets across all samples using ComplexHeatmap Bioconductor package.

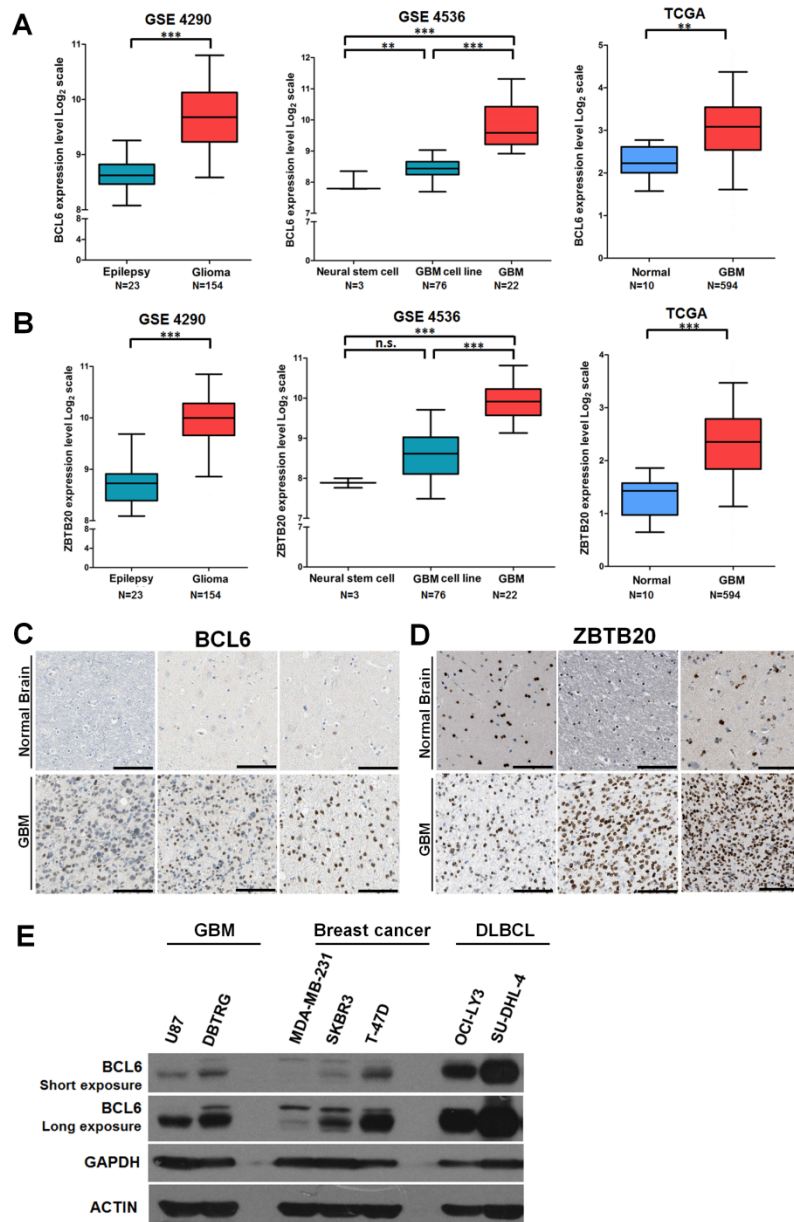

**Supplementary Figure S1. Identification of BCL6 as a novel pro-growth factor in glioma.**

(A-B) BCL6 and ZBTB20 mRNA expression in indicated samples based on GSE 4290, GSE 4536 and TCGA dataset. (C-D) IHC staining of BCL6 and ZBTB20 in normal brain tissues and GBM samples. BCL6 staining by antibody HPA004899 and ZBTB20 staining by antibody HPA016815 were analyzed based on human protein atlas (<http://www.proteinatlas.org>). Scale bars, 100  $\mu$ m. (E) Western blot result

showing the endogenous BCL6 expression among indicated GBM, breast cancer and DLBCL cells.

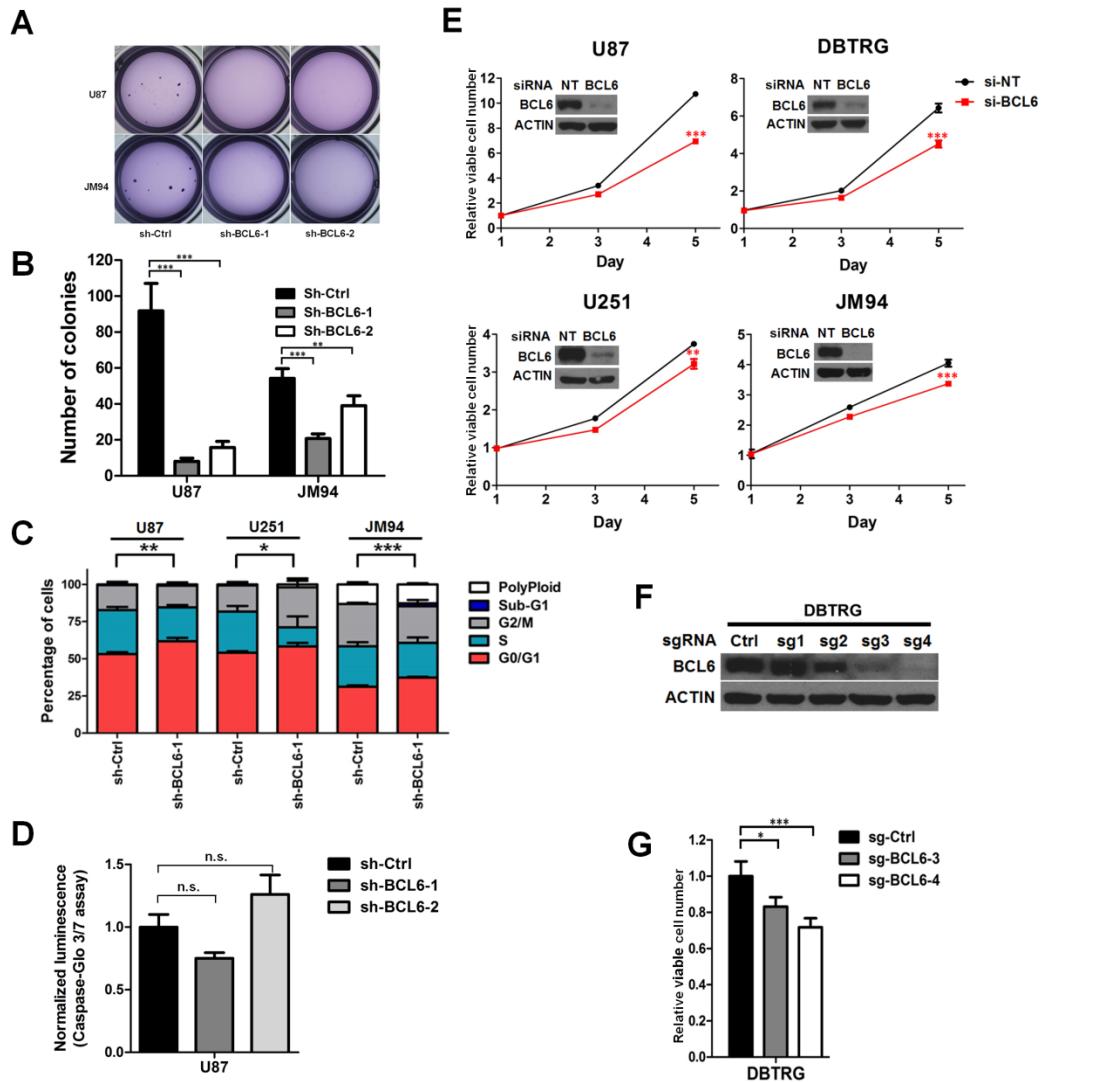

**Supplementary Figure S2. BCL6 expression is a functional requisite for GBM cell growth.**

(A-B) Effect of BCL6 depletion on anchorage-independent growth of GBM cells. (C) Effect of BCL6 depletion on cell cycle progression. Statistical results of G0/G1 cells were shown. (D) Effect of BCL6 depletion on Caspase3/7 activity in U87 cells. (E) Effect of BCL6 depletion by siRNA on GBM cell proliferation. Efficiency of BCL6 knockdown was confirmed by western blot. (F-G) Effects of CRISPR/Cas9-mediated BCL6 depletion on BCL6 expression (F) and cell viability (G) in DBTRG cells. Data of (A, B, D, E and G) represent mean  $\pm$  SD.

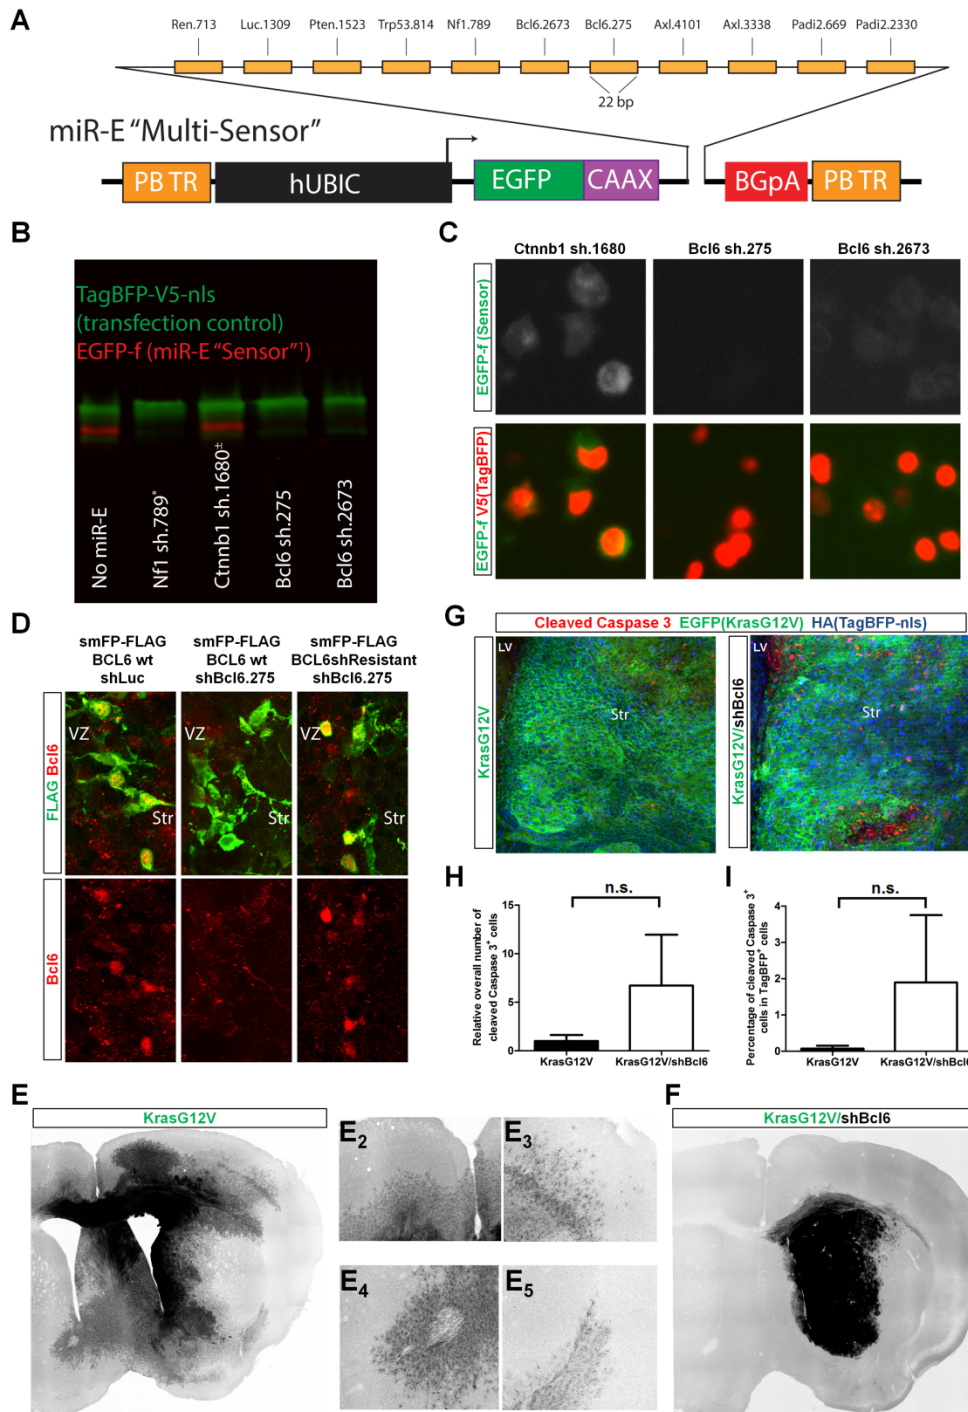

**Supplementary Figure S3. Silencing of Bcl6 using miR-E technology inhibited the progression of KrasG12V-driven glioma.**

(A) Schematic of Bcl6 miR-E “multi-sensor” construct designed to test various shRNAs including two candidate Bcl6 targeting sequences (shBcl6.275 and shBcl6.2673). (B) Western blot showing knockdown of EGFP sensor expression by

both shBcl6 candidates but not by shCtnnb.1680 whose targeting sequence was not in the multi-sensor construct, validating the specificity and efficacy of the shBcl6 candidates. shNf1.789 was used as positive control for this assay. (C) shBcl6.275 and shBcl6.2673 were both tested in vitro in HEK293T cells. shBcl6.275 was chosen due to most reduced EGFP expression of the sensor. (D) In vivo validation of specificity and efficacy shBcl6.275. The shBcl6.275 targeting site is 100% conserved in the human BCL6 mRNA. Indicated plasmids were co-injected with pCAG-pBase into the left lateral ventricle of the brain and electroporated. FLAG antibody was applied to mark the electroporated cells. shBcl6.275 diminished the expression of wild-type BCL6 but showed minimal effect on the expression of BCL6shResistant. VZ and Str denote ventricular zone and striatum, respectively. (E-F) Bcl6 silencing decreased glioma infiltration. EGFP signals from coronal sections from Fig. 3 C<sub>4</sub> and Fig. 3D<sub>4</sub> were converted to grayscale and inverted. (E) KrasG12V tumor showed substantial infiltration from initial site of electroporation at the left lateral ventricle to other hemisphere. (E<sub>2</sub>-E<sub>5</sub>) Capture of infiltration pattern of contralateral cortex (E<sub>2</sub>) from electroporation site, of ipsilateral cortex (E<sub>3</sub>), anterior commissure (E<sub>4</sub>), and lateral cortex on ipsilateral side (E<sub>5</sub>) of electroporation site. (F) KrasG12V/shBcl6 tumor showed confined margins and no infiltration to the other hemisphere. (G) Representative images and quantification results (H-I) showing the expression of cleaved Caspase 3 cells in tumors derived from KrasG12V (N=3) and KrasG12V/shBcl6 animals (N=3). LV denotes the lateral ventricle.



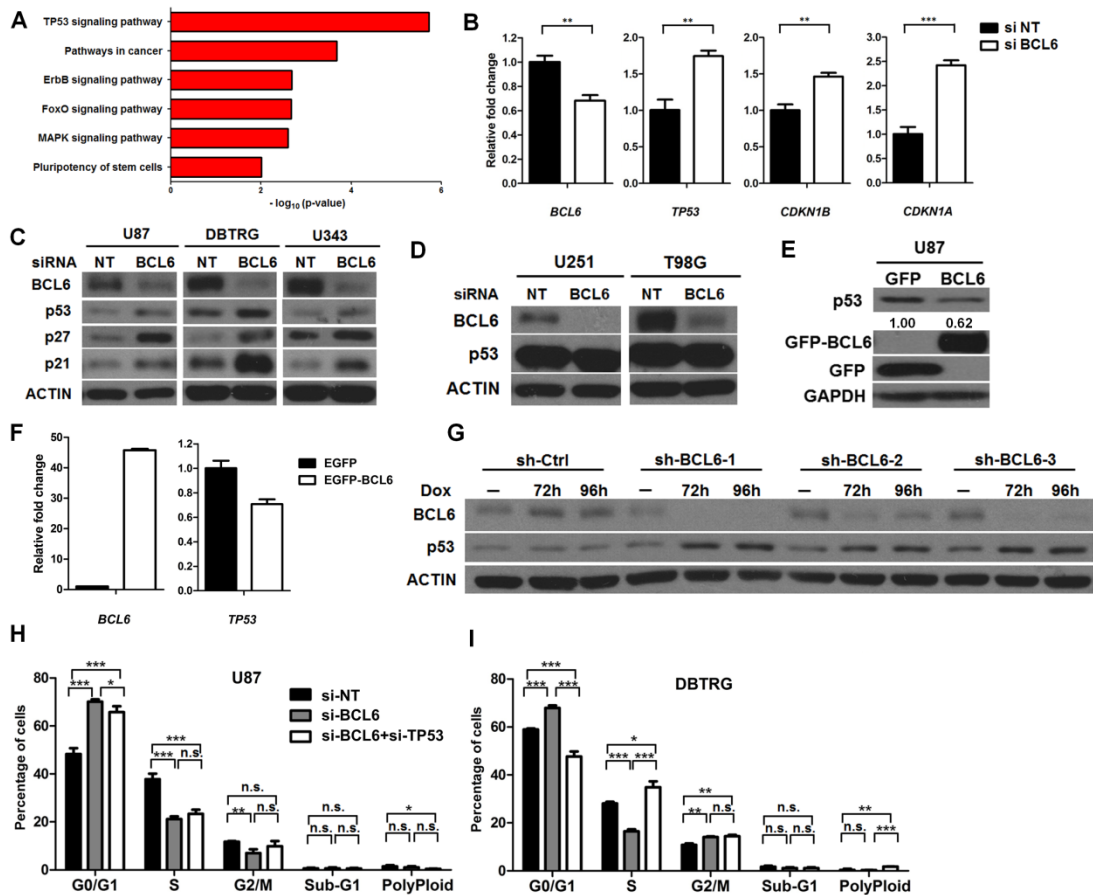

**Supplementary Figure S4. BCL6 represses TP53 pathway.**

(A) Pathway enrichment analysis of differentially expressed genes upon BCL6 knockdown in U87 cells. RNA samples were harvested 36 hours post-transfection. (B) Up-regulation of TP53, CDKN1B and CDKN1A mRNA expression upon BCL6 knockdown in U87 cells. RNA samples were harvested 36 hours post-transfection. (C) Effect of BCL6 depletion on p53, p27 and p21 protein expression. U87, DBTRG and U343 cells have wildtype *TP53*. (D) Effect of BCL6 depletion on p53 protein expression in U251 and T98G cells containing mutant *TP53*. (E-F) Overexpressed BCL6 repressed the protein (E) and mRNA (F) expression of p53 in U87 cells. (G) Up-regulation of p53 protein after doxycycline (Dox)-induced BCL6 knockdown. U87 cells expressing indicated tet-on shRNAs were treated with either DMSO or 100 ng/mL Dox for indicated duration. (H-I) Effects of BCL6 depletion or BCL6/TP53 co-depletion on cell cycle progression in U87 (H) and DBTRG (I) cells.

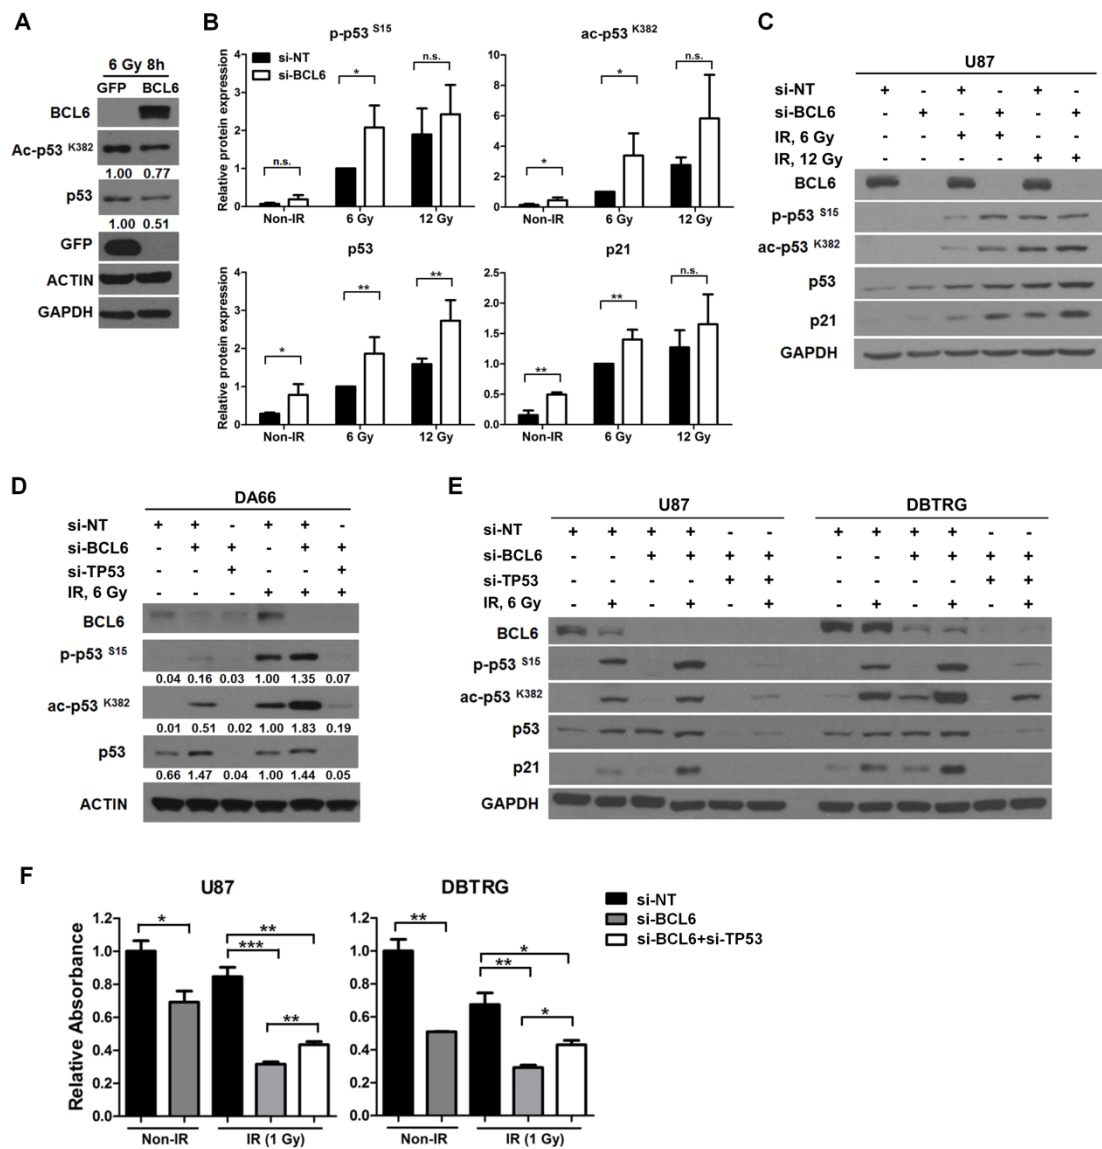

**Supplementary Figure S5. Effect of BCL6 expression on p53 in response to radiation.**

(A) Overexpressed BCL6 decreased p53 protein level in U87 cells in response to radiation. (B) Effect of BCL6 depletion on the expression of p53, p-p53<sup>S15</sup>, ac-p53<sup>K382</sup> and p21 in U87 cells 8-hour post ionizing radiation (IR). The relative amount of each protein was quantified by ImageJ using GAPDH as an internal control, and normalized further to its level in si-NT (Non-targeting) cells treated with 6-Gy IR. Data represent the means  $\pm$  SD based on three independent replicates. (C) Representative western blot results related to (B). (D) Effect of BCL6 depletion or

BCL6/TP53 co-depletion on p53 in response to radiation in a primary GBM explant line DA66 (harboring wildtype *TP53*). (E-F) Effect of BCL6 depletion or BCL6/TP53 co-depletion on protein expression (E) and long-term cell proliferation (F) in response to IR. (E) Protein samples were harvested 4-hour post-IR.

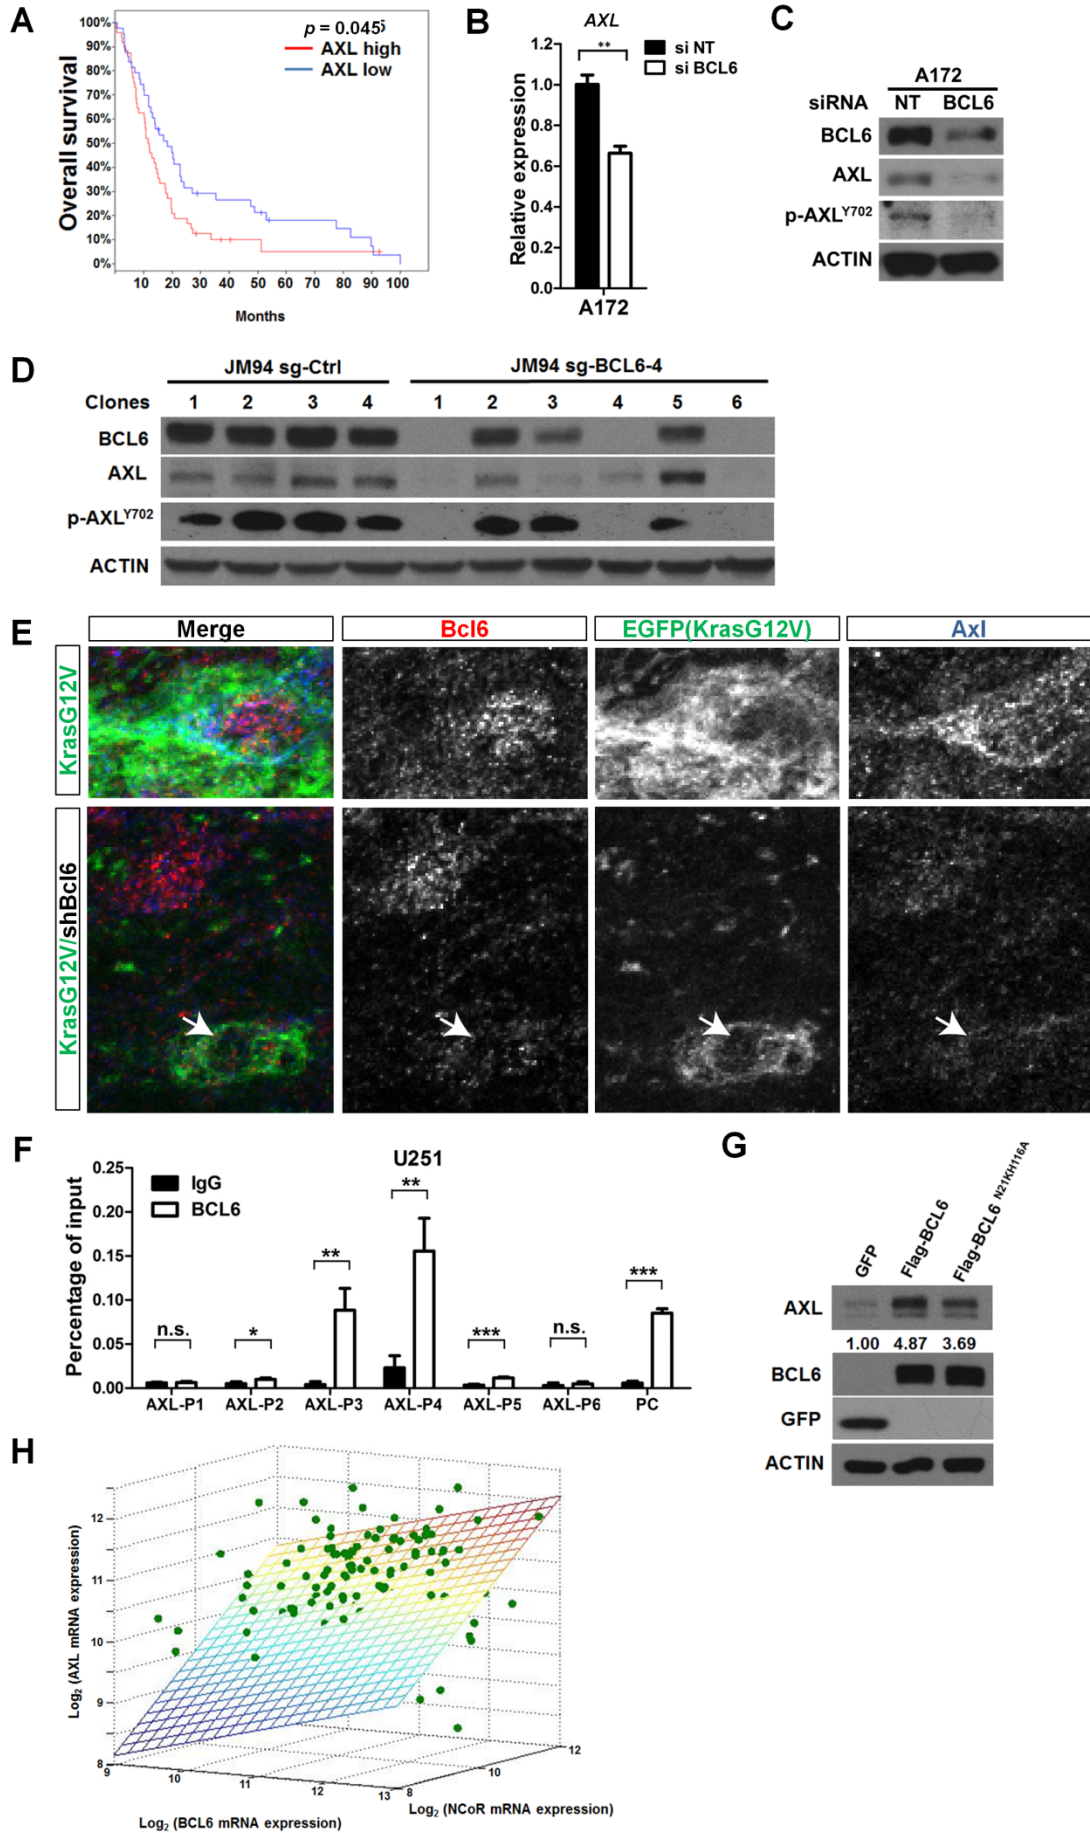

### Supplementary Figure S6. AXL is a novel target of BCL6 in GBM.

(A) Association of AXL expression with overall survival of GBM patients. Kaplan-Meier survival curves were generated based on TCGA GBM cohort. GBM patients (TCGA, Glioblastoma, Nature 2008, N=91) were divided into AXL high (mRNA expression Z-score  $>$  mean + 0.08SD) and AXL low (mRNA expression Z-score  $\leq$  mean + 0.08SD) groups. (B-C) QRT-PCR (B) and western blot (C) results showing the down-regulation of AXL after BCL6 depletion in A172 cells. (D) Protein expression of p-AXL<sup>Y702</sup>, AXL and BCL6 in single clones derived from JM94 cells stably expressing either sg-Ctrl or sg-BCL6-4. (E) Immunofluorescence staining showing the correlated expression between Bcl6 and Axl in EGFP<sup>+</sup> tumor cells (indicated by arrows) at the margin of in KrasG12V and KrasG12V/shBcl6 tumors, corresponding to the representative cells marked by white boxes in Fig. 4D. (F) ChIP-qPCR results showing the enrichment of BCL6 binding in AXL locus in U251 cells. The 5'UTR region of *BCL6* was applied as a positive control (PC). (G) Effect of either ectopic Flag-BCL6 or Flag-BCL6<sup>N21K H116A</sup> on AXL expression in U87 cells. (H) Positive correlation between BCL6&NCoR co-expression and AXL expression in GBM patients (TCGA, RNA-seq dataset, N=156). The plane represents the linear regression of BCL6 and NCoR1 (Pearson's correlation,  $R = 0.17$ ,  $p = 0.037$ ).

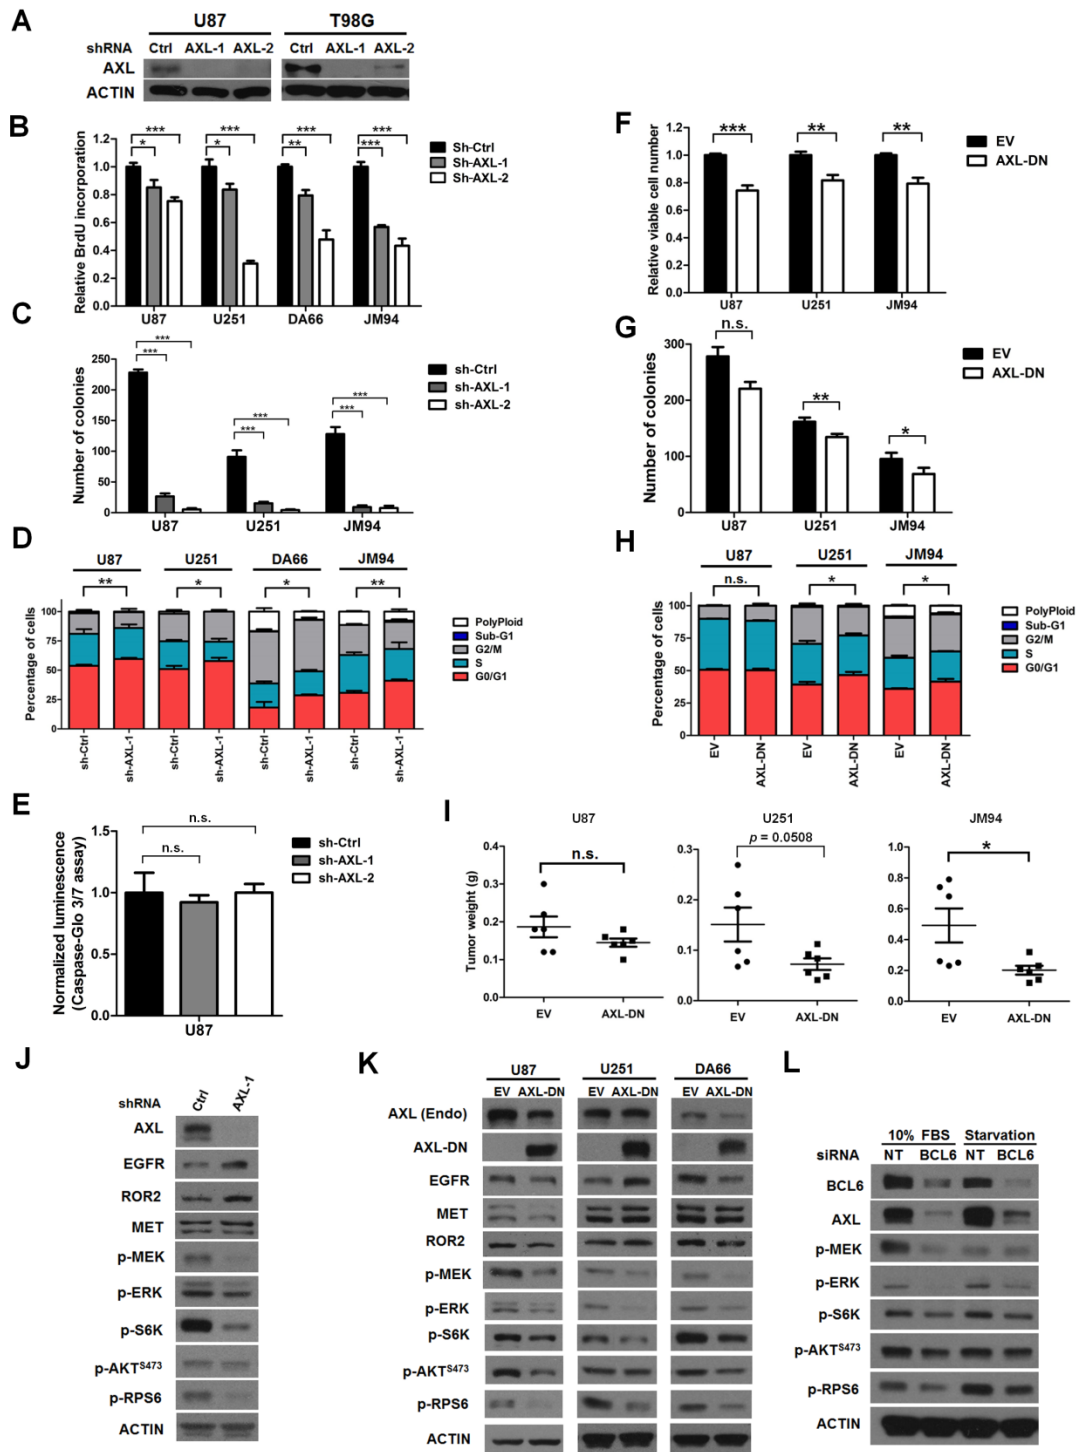

**Supplementary Figure S7. AXL enhances malignant characteristics of GBM.**

(A) Representative western blot results showing the efficiency of AXL knockdown in GBM cells. (B-D) Effect of AXL knockdown on BrdU incorporation (B), anchorage-independent growth (C) and cell cycle progression (D) of GBM cells. Statistical results of G0/G1 cells were shown. (E) Effect of AXL depletion on Caspase3/7

activity in U87 cells. (F-I) Effect of dominant negative inhibition of AXL (AXL-DN) on GBM cell viability (F), anchorage-independent growth (G), cell cycle progression (H) and xenograft growth (I). EV, empty vector control. Statistical results of G0/G1 cells were shown in (G). U87 cells ( $2 \times 10^6$  cells per injection), U251 cells ( $1.5 \times 10^6$ ) and JM94 cells ( $1 \times 10^6$ ) stably expressing AXL-DN or EV control were subcutaneously injected into NSG mice. Tumors were harvested and weighted. Data of (B-I) represent mean  $\pm$  SD. (J) Effect of AXL knockdown on downstream targets. U87 cells stably expressing either sh-Ctrl or sh-AXL-1 were serum starved for 48 hours before harvest. (K) Effect of AXL-DN on the expression of endogenous (endo) AXL, EGFR, MET, ROR2 and their downstream targets under serum starvation (48 hours) condition. (L) Effect of BCL6 knockdown on the expression of AXL and AXL downstream targets in DA66 (primary explant) cells under indicated culture conditions.

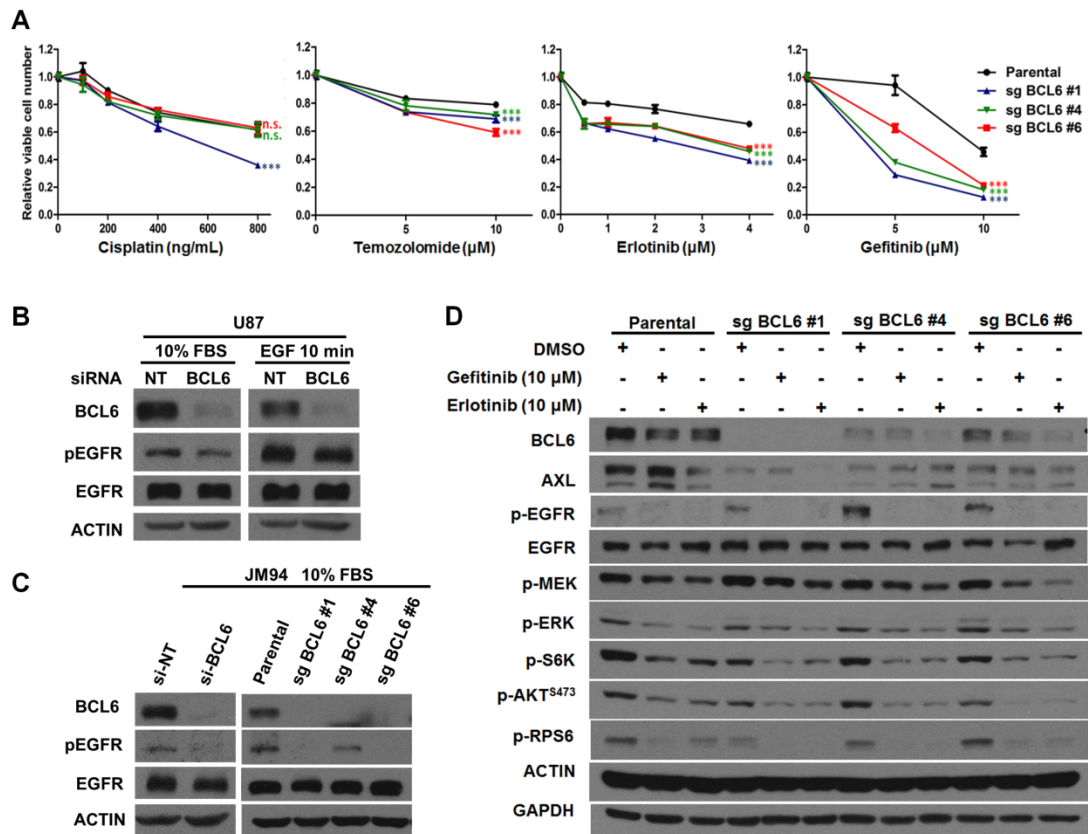

**Supplementary Figure S8. Additive effect between BCL6 silencing and EGFR inhibitors.**

(A) BCL6 depletion sensitizes JM94 cells to EGFR inhibitors. JM94 parental cells and three isogenic clones were treated with different concentrations of Gefitinib, Erlotinib, Cisplatin and Temozolomide (72 hours) followed by MTT assay. Data represent mean  $\pm$  SD. (B) Effect of BCL6 silencing on EGFR phosphorylation in U87 cells. For EGF stimulation, cells were treated with 50 ng/mL EGF for 10 min before harvest. (C) Effect of BCL6 silencing on EGFR phosphorylation in JM94 cells cultured in complete medium. (D) Parental or isogenic BCL6-silenced JM94 cells were treated with DMSO, Gefitinib or Erlotinib for 2 hours and then stimulated with 50 ng/mL EGF for 10 min before harvest.



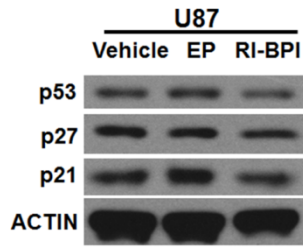

**Supplementary Figure S9. Effect of RI-BPI on p53, p27 and p21 expression.** U87 GBM cells were incubated with either 20  $\mu$ M RI-BPI, EP or vehicle control for 24 hours before harvest.

## SI Table S1

### List of oligos used for shRNA cloning

| Gene   | Oligo Name | Oligo Sequence (5'→3')                                      |
|--------|------------|-------------------------------------------------------------|
| ZBTB1  | sh1-F      | CCGGCGGTAATACACCACATAAATACTCGAGTATTATGTGGTGTATTTACCGTTTTG   |
|        | sh1-R      | AATTCAAAAACGGTAAATACACCACATAAATACTCGAGTATTATGTGGTGTATTTACCG |
|        | sh2-F      | CCGGCAGTCCGAAATAAGAGATATCTCGAGATATCTCTTATTTCCGACTGCTTTTTG   |
|        | sh2-R      | AATTCAAAAAGCAGTCCGAAATAAGAGATATCTCGAGATATCTCTTATTTCCGACTGC  |
|        | sh3-F      | CCGGGCATGTGGTAAATGTGGACAACCTCGAGTTGTCCACATTACCACATGCTTTTTG  |
| ZBTB2  | sh1-F      | CCGGCCCAGGTGAATCGGACAAATACTCGAGTATTGTCCGATTACCTGGGTTTTG     |
|        | sh1-R      | AATTCAAAAACCCAGGTGAATCGGACAAATACTCGAGTATTGTCCGATTACCTGGG    |
|        | sh2-F      | CCGGGCCAGGTGAATCGGACAAATACTCGAGTATTGTCCGATTACCTGGGCTTTTTG   |
|        | sh2-R      | AATTCAAAAAGCCCAGGTGAATCGGACAAATACTCGAGTATTGTCCGATTACCTGGGC  |
|        | sh3-F      | CCGGACCTGGAATGTATCGACTTTCTCGAGGAAAGTCGATACATTCCAGTTTTG      |
| ZBTB3  | sh1-F      | CCGGTCTTACACACTACGGCGACATCTCGAGATGTCGCCGTAGTGTGAAGTTTTG     |
|        | sh1-R      | AATTCAAAAATCTTACACACTACGGCGACATCTCGAGATGTCGCCGTAGTGTGAAGA   |
|        | sh2-F      | CCGGACATCCGCAAGGCTCACAATGCTCGAGCATTGTGAGCCTTCCGGATTTTTG     |
|        | sh2-R      | AATTCAAAAACATCCGCAAGGCTCACAATGCTCGAGCATTGTGAGCCTTCCGGATGT   |
|        | sh3-F      | CCGGCCAACTCTTCTCCACCAATTCTCGAGAATTGGTGGAGGAAGAGTTGGTTTTG    |
| ZBTB4  | sh1-F      | AATTCAAAAACCAACTCTTCTCCACCAATTCTCGAGAATTGGTGGAGGAAGAGTTGG   |
|        | sh1-R      | CCGGTCTCTGGGAAAGGGATCTTCTCGAGGAAAGATCCCTTCCAGGAGATTTTTG     |
|        | sh2-F      | AATTCAAAAATCTCTGGGAAAGGGATCTTCTCGAGGAAAGATCCCTTCCAGGAGAGA   |
|        | sh2-R      | CCGGGAGACCTTTGCACTTACTATCTCGAGATAGTAAGTGACAAAGGTCTCTTTTTG   |
|        | sh3-R      | AATTCAAAAAGAGACCTTTGTCACTTACTATCTCGAGATAGTAAGTGACAAAGGTCTC  |
| ZBTB5  | sh1-F      | CCGGGCCAGTTGTCAGACTGAATTTCTCGAGAAATTCAGTCTGACAACTGGCTTTTTG  |
|        | sh1-R      | AATTCAAAAAGCCAGTTGTCAGACTGAATTTCTCGAGAAATTCAGTCTGACAACTGGC  |
|        | sh2-F      | CCGGACCTTCTGATGGGAGTATTATCTCGAGATAATACTCCCATCAGAAGTTTTTTG   |
|        | sh2-R      | AATTCAAAAACCTTCTGATGGGAGTATTATCTCGAGATAATACTCCCATCAGAAGGT   |
|        | sh3-F      | CCGGCCATAGATGAGTCTGCCATTTCTCGAGAAATGGCAGACTCATCTATGGTTTTG   |
| ZBTB6  | sh1-F      | AATTCAAAAACCATAGATGAGTCTGCCATTTCTCGAGAAATGGCAGACTCATCTATGG  |
|        | sh1-R      | CCGGCCACTGTTGTGATATGGATTTCTCGAGAAATCCATATCACAACAGTGGTTTTG   |
|        | sh2-F      | AATTCAAAAACCACTGTTGTGATATGGATTTCTCGAGAAATCCATATCACAACAGTGG  |
|        | sh2-R      | CCGGCCGACTTCATAACCCAATGTTCTCGAGAATCCATATCACAACAGTGGTTTTG    |
|        | sh3-F      | AATTCAAAAACCGACTTCATAACCCAATGTTCTCGAGAATCCATATCACAACAGTGG   |
| ZBTB7A | sh1-F      | CCGGATAGTGTCTCTCTTATATACTCGAGTATATAAGAGAGGAACACTATTTTTG     |
|        | sh1-R      | AATTCAAAAAATAGTGTCTCTCTTATATACTCGAGTATATAAGAGAGGAACACTAT    |
|        | sh2-F      | CCGGGAACGTGTACGAGATCGACTTCTCGAGAAGTCGATCTCGTACACGTTCTTTTTG  |
|        | sh2-R      | AATTCAAAAAGAACGTTGTACGAGATCGACTTCTCGAGAAGTCGATCTCGTACACGTT  |
|        | sh3-F      | CCGGGCCACTGAGACACAAACCTATCTCGAGATAGGTTTTGTCTCAGTGGCTTTTTG   |
| ZBTB7B | sh1-F      | AATTCAAAAAGCCACTGAGACACAAACCTATCTCGAGATAGGTTTTGTCTCAGTGGC   |
|        | sh1-R      | CCGGCCACTGAGACACAAACCTATCTCGAGATAGGTTTTGTCTCAGTGGTTTTG      |
|        | sh2-F      | AATTCAAAAACCATGAGACACAAACCTATCTCGAGATAGGTTTTGTCTCAGTGGG     |
|        | sh2-R      | AATTCAAAAAGCCACTGAGACACAAACCTATCTCGAGATAGGTTTTGTCTCAGTGGC   |
|        | sh3-R      | AATTCAAAAACCATGAGACACAAACCTATCTCGAGATAGGTTTTGTCTCAGTGGG     |
| ZBTB7C | sh1-F      | CCGGTATCAGATCCAGCTCTATATTCTCGAGAATATAGAGCTGGATGTGATTTTTG    |
|        | sh1-R      | AATTCAAAAATAGCATCCAGCTCTATATTCTCGAGAATATAGAGCTGGATGTGATA    |
|        | sh2-F      | CCGGGAGTGAAGCAATAATGATTTCTCGAGAATACATTATTGCTTCTACTCTTTTTG   |
|        | sh2-R      | AATTCAAAAAGAGTGAAGCAATAATGATTTCTCGAGAATACATTATTGCTTCTACTC   |
|        | sh3-F      | CCGGGAGTGAAGCAATAATGATTTCTCGAGAATACATTATTGCTTCTACTCTTTTTG   |
| ZBTB7D | sh1-F      | AATTCAAAAAGAGGAGCTGGTATATCTCGAGATATACCAGCTCCTCTTCTTTTTG     |
|        | sh1-R      | CCGGGAGTGAAGCAATAATGATTTCTCGAGAATACATTATTGCTTCTACTCTTTTTG   |
|        | sh2-F      | AATTCAAAAAGAGGAGCTGGTATATCTCGAGATATACCAGCTCCTCTTCTTTTTG     |
|        | sh2-R      | AATTCAAAAAGAGGAGCTGGTATATCTCGAGATATACCAGCTCCTCTTCTTTTTG     |
|        | sh3-R      | AATTCAAAAAGAGGAGCTGGTATATCTCGAGATATACCAGCTCCTCTTCTTTTTG     |
| ZBTB7E | sh1-F      | CCGGTATCAGATCCAGCTCTATATTCTCGAGAATATAGAGCTGGATGTGATTTTTG    |
|        | sh1-R      | AATTCAAAAATAGCATCCAGCTCTATATTCTCGAGAATATAGAGCTGGATGTGATA    |
|        | sh2-F      | CCGGGAGTGAAGCAATAATGATTTCTCGAGAATACATTATTGCTTCTACTCTTTTTG   |
|        | sh2-R      | AATTCAAAAAGAGTGAAGCAATAATGATTTCTCGAGAATACATTATTGCTTCTACTC   |
|        | sh3-F      | CCGGGAGTGAAGCAATAATGATTTCTCGAGAATACATTATTGCTTCTACTCTTTTTG   |
| ZBTB7F | sh1-F      | AATTCAAAAAGCAAGGAAAGAGTCCATTAACCTCGAGTTAATGGACTCTTTCCTGG    |
|        | sh1-R      | CCGGGAGTGAAGCAATAATGATTTCTCGAGAATACATTATTGCTTCTACTCTTTTTG   |
|        | sh2-F      | CCGGGCAAGCAAGGAAAGAGTCCATTAACCTCGAGTTAATGGACTCTTTCCTGG      |
|        | sh2-R      | AATTCAAAAAGCAAGGAAAGAGTCCATTAACCTCGAGTTAATGGACTCTTTCCTGG    |
|        | sh3-F      | CCGGGCAAGCAAGGAAAGAGTCCATTAACCTCGAGTTAATGGACTCTTTCCTGG      |
| ZBTB7G | sh1-F      | CCGGTATCAGATCCAGCTCTATATTCTCGAGAATATAGAGCTGGATGTGATTTTTG    |
|        | sh1-R      | AATTCAAAAATAGCATCCAGCTCTATATTCTCGAGAATATAGAGCTGGATGTGATA    |
|        | sh2-F      | CCGGGAGTGAAGCAATAATGATTTCTCGAGAATACATTATTGCTTCTACTCTTTTTG   |
|        | sh2-R      | AATTCAAAAAGAGTGAAGCAATAATGATTTCTCGAGAATACATTATTGCTTCTACTC   |
|        | sh3-F      | CCGGGAGTGAAGCAATAATGATTTCTCGAGAATACATTATTGCTTCTACTCTTTTTG   |
| ZBTB7H | sh1-F      | CCGGTATCAGATCCAGCTCTATATTCTCGAGAATATAGAGCTGGATGTGATTTTTG    |
|        | sh1-R      | AATTCAAAAATAGCATCCAGCTCTATATTCTCGAGAATATAGAGCTGGATGTGATA    |
|        | sh2-F      | CCGGGAGTGAAGCAATAATGATTTCTCGAGAATACATTATTGCTTCTACTCTTTTTG   |
|        | sh2-R      | AATTCAAAAAGAGTGAAGCAATAATGATTTCTCGAGAATACATTATTGCTTCTACTC   |
|        | sh3-F      | CCGGGAGTGAAGCAATAATGATTTCTCGAGAATACATTATTGCTTCTACTCTTTTTG   |
| ZBTB7I | sh1-F      | CCGGTATCAGATCCAGCTCTATATTCTCGAGAATATAGAGCTGGATGTGATTTTTG    |
|        | sh1-R      | AATTCAAAAATAGCATCCAGCTCTATATTCTCGAGAATATAGAGCTGGATGTGATA    |
|        | sh2-F      | CCGGGAGTGAAGCAATAATGATTTCTCGAGAATACATTATTGCTTCTACTCTTTTTG   |
|        | sh2-R      | AATTCAAAAAGAGTGAAGCAATAATGATTTCTCGAGAATACATTATTGCTTCTACTC   |
|        | sh3-F      | CCGGGAGTGAAGCAATAATGATTTCTCGAGAATACATTATTGCTTCTACTCTTTTTG   |
| ZBTB7J | sh1-F      | CCGGTATCAGATCCAGCTCTATATTCTCGAGAATATAGAGCTGGATGTGATTTTTG    |
|        | sh1-R      | AATTCAAAAATAGCATCCAGCTCTATATTCTCGAGAATATAGAGCTGGATGTGATA    |
|        | sh2-F      | CCGGGAGTGAAGCAATAATGATTTCTCGAGAATACATTATTGCTTCTACTCTTTTTG   |
|        | sh2-R      | AATTCAAAAAGAGTGAAGCAATAATGATTTCTCGAGAATACATTATTGCTTCTACTC   |
|        | sh3-F      | CCGGGAGTGAAGCAATAATGATTTCTCGAGAATACATTATTGCTTCTACTCTTTTTG   |
| ZBTB7K | sh1-F      | CCGGTATCAGATCCAGCTCTATATTCTCGAGAATATAGAGCTGGATGTGATTTTTG    |
|        | sh1-R      | AATTCAAAAATAGCATCCAGCTCTATATTCTCGAGAATATAGAGCTGGATGTGATA    |
|        | sh2-F      | CCGGGAGTGAAGCAATAATGATTTCTCGAGAATACATTATTGCTTCTACTCTTTTTG   |
|        | sh2-R      | AATTCAAAAAGAGTGAAGCAATAATGATTTCTCGAGAATACATTATTGCTTCTACTC   |
|        | sh3-F      | CCGGGAGTGAAGCAATAATGATTTCTCGAGAATACATTATTGCTTCTACTCTTTTTG   |
| ZBTB7L | sh1-F      | CCGGTATCAGATCCAGCTCTATATTCTCGAGAATATAGAGCTGGATGTGATTTTTG    |
|        | sh1-R      | AATTCAAAAATAGCATCCAGCTCTATATTCTCGAGAATATAGAGCTGGATGTGATA    |
|        | sh2-F      | CCGGGAGTGAAGCAATAATGATTTCTCGAGAATACATTATTGCTTCTACTCTTTTTG   |
|        | sh2-R      | AATTCAAAAAGAGTGAAGCAATAATGATTTCTCGAGAATACATTATTGCTTCTACTC   |
|        | sh3-F      | CCGGGAGTGAAGCAATAATGATTTCTCGAGAATACATTATTGCTTCTACTCTTTTTG   |
| ZBTB7M | sh1-F      | CCGGTATCAGATCCAGCTCTATATTCTCGAGAATATAGAGCTGGATGTGATTTTTG    |
|        | sh1-R      | AATTCAAAAATAGCATCCAGCTCTATATTCTCGAGAATATAGAGCTGGATGTGATA    |
|        | sh2-F      | CCGGGAGTGAAGCAATAATGATTTCTCGAGAATACATTATTGCTTCTACTCTTTTTG   |
|        | sh2-R      | AATTCAAAAAGAGTGAAGCAATAATGATTTCTCGAGAATACATTATTGCTTCTACTC   |
|        | sh3-F      | CCGGGAGTGAAGCAATAATGATTTCTCGAGAATACATTATTGCTTCTACTCTTTTTG   |
| ZBTB7N | sh1-F      | CCGGTATCAGATCCAGCTCTATATTCTCGAGAATATAGAGCTGGATGTGATTTTTG    |
|        | sh1-R      | AATTCAAAAATAGCATCCAGCTCTATATTCTCGAGAATATAGAGCTGGATGTGATA    |
|        | sh2-F      | CCGGGAGTGAAGCAATAATGATTTCTCGAGAATACATTATTGCTTCTACTCTTTTTG   |
|        | sh2-R      | AATTCAAAAAGAGTGAAGCAATAATGATTTCTCGAGAATACATTATTGCTTCTACTC   |
|        | sh3-F      | CCGGGAGTGAAGCAATAATGATTTCTCGAGAATACATTATTGCTTCTACTCTTTTTG   |
| ZBTB7O | sh1-F      | CCGGTATCAGATCCAGCTCTATATTCTCGAGAATATAGAGCTGGATGTGATTTTTG    |
|        | sh1-R      | AATTCAAAAATAGCATCCAGCTCTATATTCTCGAGAATATAGAGCTGGATGTGATA    |
|        | sh2-F      | CCGGGAGTGAAGCAATAATGATTTCTCGAGAATACATTATTGCTTCTACTCTTTTTG   |
|        | sh2-R      | AATTCAAAAAGAGTGAAGCAATAATGATTTCTCGAGAATACATTATTGCTTCTACTC   |
|        | sh3-F      | CCGGGAGTGAAGCAATAATGATTTCTCGAGAATACATTATTGCTTCTACTCTTTTTG   |

|        |                                                              |                                                              |
|--------|--------------------------------------------------------------|--------------------------------------------------------------|
|        | sh3-R                                                        | AATTCAAAAACAACACGGAATCTTACCAATTCTCGAGAATTGTAAGATCCGTGTTG     |
| ZBTB11 | sh1-F                                                        | CCGGTGTCTAGCAAATAGCGAGTATTCTCGAGAATACTCGCTATTTGCTGACATTTTTG  |
|        | sh1-R                                                        | AATTCAAAAATGTCTAGCAAATAGCGAGTATTCTCGAGAATACTCGCTATTTGCTGACA  |
|        | sh2-F                                                        | CCGGGCCCTGATGATGATACTTATACTCGAGTATAAGTATCATCATCAGGGCTTTTTG   |
|        | sh2-R                                                        | AATTCAAAAAGCCCTGATGATGATACTTATACTCGAGTATAAGTATCATCATCAGGGC   |
|        | sh3-F                                                        | CCGGTAGATCGATCCCGTCCAATATCTCGAGATATTGGACGGGATCGATCTATTTTTG   |
| ZBTB12 | sh3-R                                                        | AATTCAAAAATAGATCGATCCCGTCCAATATCTCGAGATATTGGACGGGATCGATCTA   |
|        | sh1-F                                                        | CCGGGTCTGACATCTGCATCGTCAACTCGAGTTGACGATGCAGATGTCAGACTTTTTG   |
|        | sh1-R                                                        | AATTCAAAAAGTCTGACATCTGCATCGTCAACTCGAGTTGACGATGCAGATGTCAGAC   |
|        | sh2-F                                                        | CCGGTCTGACATCTGCATCGTCAACTCGAGTTGACGATGCAGATGTCAGACTTTTTG    |
|        | sh2-R                                                        | AATTCAAAACTGACATCTGCATCGTCAACTCGAGTTGACGATGCAGATGTCAGATCTA   |
| ZBTB14 | sh3-F                                                        | CCGGGATGATTCCTTGGAGAGACTTCTCGAGAAGTCTCTCCAAGGAATCATCTTTTTG   |
|        | sh3-R                                                        | AATTCAAAAAGATGATTCCTTGGAGAGACTTCTCGAGAAGTCTCTCCAAGGAATCATC   |
|        | sh1-F                                                        | CCGGCCCAAGATTTCTAGATTTAACTCGAGTTTAACTTAGGAAATCTTGGGTTTTTG    |
|        | sh1-R                                                        | AATTCAAAAACCTCAAGATTTCTAGATTTAACTCGAGTTTAACTTAGGAAATCTTGGG   |
|        | sh2-F                                                        | CCGGCAGATTTCTGGTATCCGATTTCTCGAGAAATCGGATACCAAGAATCTGTTTTG    |
| ZBTB16 | sh2-R                                                        | AATTCAAAAACAGATTTCTGGTATCCGATTTCTCGAGAAATCGGATACCAAGAATCTG   |
|        | sh3-F                                                        | CCGGCTTCGGTCAAGAAATAGATTTCTCGAGAATCTATTTCTATGACCCGAAGTTTTG   |
|        | sh3-R                                                        | AATTCAAAACTTCGGTCAAGAAATAGATTTCTCGAGAATCTATTTCTATGACCCGAAG   |
|        | sh1-F                                                        | CCGGCCACCGCAATAGTCAACACTACTCGAGTAGTGTGACTATTGCGGTGGTTTTTG    |
|        | sh1-R                                                        | AATTCAAAAACCGCAATAGTCAACACTACTCGAGTAGTGTGACTATTGCGGTGG       |
| ZBTB17 | sh2-F                                                        | CCGGGAATGCACTTACTGGCTCATTCTCGAGAATGAGCCAGTAAGTGCATTTCTTTTTG  |
|        | sh2-R                                                        | AATTCAAAAAGATGCACTTACTGGCTCATTCTCGAGAATGAGCCAGTAAGTGCATTTCT  |
|        | sh3-F                                                        | CCGGCCACAAGGCTGACGCTGTATTCTCGAGAATACAGCGTCAGCCTTGTGGTTTTG    |
|        | sh3-R                                                        | AATTCAAAAACCACAAGGCTGACGCTGTATTCTCGAGAATACAGCGTCAGCCTTGTGG   |
|        | sh1-F                                                        | CCGGCCTGTCCAAGCACATCATCTCGAGATGATGATGTGCTTGGACAGGTTTTTG      |
| ZBTB18 | sh1-R                                                        | AATTCAAAACTGTCCAAGCACATCATCTCGAGATGATGATGTGCTTGGACAGG        |
|        | sh2-F                                                        | CCGGTGTCCAAGCACATCATCTCGAGGAATGATGATGTGCTTGGACATTTTTG        |
|        | sh2-R                                                        | AATTCAAAAATGTCCAAGCACATCATCTCGAGGAATGATGATGTGCTTGGACA        |
|        | sh3-F                                                        | CCGGGCGGACTTCTATCAGCAGTATCTCGAGATACTGCTGATAGAAGTCCGCTTTTTG   |
|        | sh3-R                                                        | AATTCAAAAAGCGGACTTCTATCAGCAGTATCTCGAGATACTGCTGATAGAAGTCCGC   |
| PATZ1  | sh1-F                                                        | CCGGCACTAATAACAGGGTACAGTACTCGAGTACTGTACCCTGTTATTAGTGTTTTTG   |
|        | sh1-R                                                        | AATTCAAAAACTAATAACAGGGTACAGTACTCGAGTACTGTACCCTGTTATTAGTG     |
|        | sh2-F                                                        | CCGGATAGTTGTGGTACGGCTAACTCGAGTTTACAGCCGTACCACAACATTTTTG      |
|        | sh2-R                                                        | AATTCAAAAATAGTTGTGGTACGGCTAACTCGAGTTTACAGCCGTACCACAACAT      |
|        | sh3-F                                                        | CCGGTACTGTAACATAGCCTATTTCTCGAGAAATAGGCTATGTTTACAGTATTTTTG    |
| ZBTB20 | sh3-R                                                        | AATTCAAAAACTGTAACATAGCCTATTTCTCGAGAAATAGGCTATGTTTACAGTA      |
|        | sh1-F                                                        | CCGGGCAACAAAGAGGCCAGAAATCTCGAGATTTCTGGCCTTCTTTGTTGCTTTTTG    |
|        | sh1-R                                                        | AATTCAAAAAGCAACAAAGAGGCCAGAAATCTCGAGATTTCTGGCCTTCTTTGTTGC    |
|        | sh2-F                                                        | CCGGCCGCTCTAAGTCTTACTTGAACCTCGAGTTCAAGTAGGACTTAGAGCCGTTTTG   |
|        | sh2-R                                                        | AATTCAAAAACGCTCTAAGTCTTACTTGAACCTCGAGTTCAAGTAGGACTTAGAGCCG   |
| ZBTB21 | sh3-F                                                        | CCGGTGTACCTTGAACGGACATATCTCGAGATATGTCGGTTCAAGTATCATTTTTG     |
|        | sh3-R                                                        | AATTCAAAAATGATCACTTGAACGGACATATCTCGAGATATGTCGGTTCAAGTATCA    |
|        | sh1-F                                                        | CCGGCGCAGACAAACCAGCTAGAAACTCGAGTTTCTAGCTGGTTTGTCTGCGTTTTG    |
|        | sh1-R                                                        | AATTCAAAAACGCAGACAAACCAGCTAGAAACTCGAGTTTCTAGCTGGTTTGTCTGCG   |
|        | sh2-F                                                        | CCGGAGCTATGGCACTAGAATTTAACTCGAGTTAAATCTAGTGCCATAGCTTTTTG     |
| ZBTB22 | sh2-R                                                        | AATTCAAAAAGCTATGGCACTAGAATTTAACTCGAGTTAAATCTAGTGCCATAGCT     |
|        | sh3-F                                                        | CCGGCCCTGCTGGTACATTTACATTTCTCGAGAAATGTAATGTACCAGCAGGCTTTTTG  |
|        | sh3-R                                                        | AATTCAAAAAGCTGCTGGTACATTTACATTTCTCGAGAAATGTAATGTACCAGCAGGC   |
|        | sh1-F                                                        | CCGGCGAGAGCAAGTGTGAGTATACTCGAGTTTACTCACACTTGTCTCGTTTTTG      |
|        | sh1-R                                                        | AATTCAAAAACGAGAGCAAGTGTGAGTATACTCGAGTTTACTCACACTTGTCTCGTT    |
| ZBTB24 | sh2-F                                                        | CCGGCCTTTCTGACTAACATCGTTTTCTCGAGAAACGATGTTAGTCAGAAAGGTTTTG   |
|        | sh2-R                                                        | AATTCAAAAACCTTTCTGACTAACATCGTTTTCTCGAGAAACGATGTTAGTCAGAAAGG  |
|        | sh3-F                                                        | CCGGGCAGCGAATACTTTTCAGAGTTCTCGAGAACTCTGAAAGTATTCGCTTTTTG     |
|        | sh3-R                                                        | AATTCAAAAAGCAGCGAATACTTTTCAGAGTTCTCGAGAACTCTGAAAGTATTCGCTGC  |
|        | sh1-F                                                        | CCGGTGCCTGAACTACTCCGAGAACTCGAGTTCTCGGAGTAGTTTCAAGTGTGTTTTG   |
| ZBTB25 | sh1-R                                                        | AATTCAAAAATGCACTGAACTACTCCGAGAACTCGAGTTCTCGGAGTAGTTTCAAGTGC  |
|        | sh2-F                                                        | CCGGGCTACCCTCAGCATAAGTGTCTCGAGATCACTTATGCTGAGGGTAGCTTTTTG    |
|        | sh2-R                                                        | AATTCAAAAAGCTACCCTCAGCATAAGTGTCTCGAGATCACTTATGCTGAGGGTAGC    |
|        | sh3-F                                                        | CCGGGTGCTCCTAAATGTGGCACATTTCTCGAGAAATGTCACATTTGGAGCACTTTTTG  |
|        | sh3-R                                                        | AATTCAAAAAGTGTCTCCTAAATGTGGCACATTTCTCGAGAAATGTCACATTTGGAGCAC |
| GZF1   | sh1-F                                                        | CCGGGTGGATGTTACTAGGACTAATCTCGAGATTAGTCTAGTACCATCCACTTTTTG    |
|        | sh1-R                                                        | AATTCAAAAAGTGGATGTTACTAGGACTAATCTCGAGATTAGTCTAGTACCATCCAC    |
|        | sh2-F                                                        | CCGGCCACATGCTGATTTATCATAACTCGAGTTATGATAAATCAGCATGTGGTTTTTG   |
|        | sh2-R                                                        | AATTCAAAAACCACATGCTGATTTATCATAACTCGAGTTATGATAAATCAGCATGTGG   |
|        | sh3-F                                                        | CCGGGCACACCTCAATACAGATAACTCGAGTTATCGTGTATTGAGGTGTGCTTTTTG    |
| ZBTB24 | sh3-R                                                        | AATTCAAAAAGCACACCTCAATACAGATAACTCGAGTTATCGTGTATTGAGGTGTGC    |
|        | sh1-F                                                        | CCGGCCTTGTGACATTTACTTTAATCTCGAGATTTAAAGTAAATGTCACAGAGGTTTTG  |
|        | sh1-R                                                        | AATTCAAAAACCTTGTGACATTTACTTTAATCTCGAGATTTAAAGTAAATGTCACAGAGG |
|        | sh2-F                                                        | CCGGGAAGCCATTTACTTGTGAAATCTCGAGATTTCAAGTAAATGGCTTCTTTTTG     |
|        | sh2-R                                                        | AATTCAAAAAGAAGCCATTTACTTGTGAAATCTCGAGATTTCAAGTAAATGGCTTCT    |
| ZBTB25 | sh3-F                                                        | CCGGCAGTGTTCACAATTTCTCGAGAAATGAAATGTGAAACACTGCTTTTTG         |
|        | sh3-R                                                        | AATTCAAAAAGCAGTGTTCACAATTTCTCGAGAAATGAAATGTGAAACACTGCT       |
|        | sh1-F                                                        | CCGGCGCTTGTCAACAAGAACACTACTCGAGTAAAGTGTCTTGTGACAAGCGTTTTTG   |
|        | sh1-R                                                        | AATTCAAAAACGCTTGTCAACAAGAACACTACTCGAGTAAAGTGTCTTGTGACAAGCG   |
|        | sh2-F                                                        | CCGGGCCGACTACCTTTCTCACATTTCTCGAGAAATGTCAGAAAGGTAGTCCGCTTTTTG |
| sh2-R  | AATTCAAAAAGCCGACTACCTTTCTCACATTTCTCGAGAAATGTCAGAAAGGTAGTCCGC |                                                              |

|        |       |                                                               |
|--------|-------|---------------------------------------------------------------|
|        | sh3-F | CCGGCAGATCAGTCAAGTATCTTTGCTCGAGCAAAGATACTTGACTGATCTGTTTTG     |
|        | sh3-R | AATTCAAAAACAGATCAGTCAAGTATCTTTGCTCGAGCAAAGATACTTGACTGATCTG    |
| ZBTB26 | sh1-F | CCGGCCCTTCTTAAGAGACCAATTTCTCGAGAAATGGTCTCTTAAGAAGGGTTTTG      |
|        | sh1-R | AATTCAAAAACCCCTTCTTAAGAGACCAATTTCTCGAGAAATGGTCTCTTAAGAAGGG    |
|        | sh2-F | CCGGGAACACTACGCCAACCATTTAAACTCGAGTTTAAATGGTTGGCGTAGTTCTTTTTG  |
|        | sh2-R | AATTCAAAAAGAAGTACGCCAACCATTTAAACTCGAGTTTAAATGGTTGGCGTAGTTCT   |
|        | sh3-F | CCGGTGCGTGTGCATGCCGGAATTAAGTCTCGAGTAATCCGGCATGCACACGCATTTTTG  |
|        | sh3-R | AATTCAAAAATGCGTGTGCATGCCGGAATTAAGTCTCGAGTAATCCGGCATGCACACGCA  |
| BCL6   | sh1-F | CCGGCCACAGTGACAACCCCTACAACCTCGAGTTGTAGGGTTTGTCACTGTGTTTTG     |
|        | sh1-R | AATTCAAAAACACAGTGACAACCCCTACAACCTCGAGTTGTAGGGTTTGTCACTGTGG    |
|        | sh2-F | CCGGTGTGCCACAGCAATATCTATTCTCGAGAATAGATATTGCTGTGGCACATTTTTG    |
|        | sh2-R | AATTCAAAAATGTGCCACAGCAATATCTATTCTCGAGAATAGATATTGCTGTGGCACA    |
|        | sh3-F | CCGGCCCATGATGTAGTGCCCTTTCTCGAGAAAGAGGCACTACATCATGGTTTTTTG     |
|        | sh3-R | AATTCAAAAACCCATGATGTAGTGCCCTTTCTCGAGAAAGAGGCACTACATCATGGG     |
| BCL6B  | sh1-F | CCGGTACAAGTACATGAACTTAACTCGAGTTTAGCACGATGACTGTACTGTTTTG       |
|        | sh1-R | AATTCAAAAAGTACAAGTACATGAACTTAACTCGAGTTTAGCACGATGACTGTACTGTAC  |
|        | sh2-F | CCGGGAAATGTCCACCCCTTAATTTCTCGAGAATTAAGAGGGTGGCAATTTCTTTTTG    |
|        | sh2-R | AATTCAAAAAGAAATGTCCACCCCTTAATTTCTCGAGAATTAAGAGGGTGGCAATTTCT   |
| HIC1   | sh1-F | CCGGCGGACTGATAATGTGAAGTTCTCGAGAATTCACATTAATCAGTCCGTTTTG       |
|        | sh1-R | AATTCAAAAACGGGACTGATAATGTGAAGTTCTCGAGAATTCACATTAATCAGTCCCG    |
|        | sh2-F | CCGGATAATGTGAAGTTCTCATTTCTCGAGAAATGAGGAACTTACATTAATTTTTG      |
|        | sh2-R | AATTCAAAAAATATGTGAAGTTCTCATTTCTCGAGAAATGAGGAACTTACATTAAT      |
|        | sh3-F | CCGGTCTCTCTACTCGTGAAGTAACTCGAGTTTCACTCCAGCGATAGAGGAGTTTTG     |
|        | sh3-R | AATTCAAAAATCTCTCTACTCGTGAAGTAACTCGAGTTTCACTCCAGCGATAGAGGAGA   |
| HIC2   | sh1-F | CCGGACGTTTGTGCGACATAGTATTCTCGAGAATACTATGTCCGCAAAACGTTTTTTG    |
|        | sh1-R | AATTCAAAAACGTTTGTGCGACATAGTATTCTCGAGAATACTATGTCCGCAAAACGTT    |
|        | sh2-F | CCGGTGCCAACAGTGCCTCTTATTCTCGAGAAATAGAGGCACTGTGGCAATTTTTG      |
|        | sh2-R | AATTCAAAAATGCCAACAGTGCCTCTTATTCTCGAGAAATAGAGGCACTGTGGCA       |
|        | sh3-F | CCGGCGCCAGCAGCATCTATTCAACTCGAGTTGAAATAGATGCTGCTGGGTTTTTTG     |
|        | sh3-R | AATTCAAAAACGCCAGCAGCATCTATTCAACTCGAGTTGAAATAGATGCTGCTGGCG     |
| MYNN   | sh1-F | CCGGTCTCTACATCAGATACATTCTCGAGAATGTATCTGATGTAGGAGACTTTTTG      |
|        | sh1-R | AATTCAAAAAGTCTCTACATCAGATACATTCTCGAGAATGTATCTGATGTAGGAGAC     |
|        | sh2-F | CCGGATTTGAGTTGTGACCATTATTCTCGAGAATAATGGTCACAACCTCAAATTTTTG    |
|        | sh2-R | AATTCAAAAAATTTGAGTTGTGACCATTATTCTCGAGAATAATGGTCACAACCTCAA     |
|        | sh3-F | CCGGACCATTTATCTCGAAATTAATCTCGAGATAATTCGAGATAAATGGCTTTTTTTG    |
|        | sh3-R | AATTCAAAAAGACCATTATCTGCGAATTAATCTCGAGATAATTCGAGATAAATGGTC     |
| ZBTB32 | sh1-F | CCGGAGGATCCCCTGTCCCTAAATCTCGAGATTAGGGACAGTGGGATCCTTTTTTG      |
|        | sh1-R | AATTCAAAAAAGGATCCCCTGTCCCTAAATCTCGAGATTAGGGACAGTGGGATCCCT     |
|        | sh2-F | CCGGTTAGCCAAGAGTCCAATTAAGTCTCGAGTTAATGGACTTTGGCTGTTTTTTG      |
| ZBTB33 | sh2-R | AATTCAAAAACTAGCCAAGAGTCCAATTAAGTCTCGAGTTAATGGACTTTGGCTTAAG    |
|        | sh1-F | CCGGCCCTTCCATGTTAGCACTTACTCGAGTAAAGTCTAACATGGAAGGGTTTTTTG     |
|        | sh1-R | AATTCAAAAACCCCTTCCATGTTAGCACTTACTCGAGTAAAGTCTAACATGGAAGGG     |
|        | sh2-F | CCGGCGGTGAAGATACTTATGATATCTCGAGATATCATAAGTATCTTCCCTTTTTTTG    |
|        | sh2-R | AATTCAAAAACGGTGAAGATACTTATGATATCTCGAGATATCATAAGTATCTTCCCG     |
|        | sh3-F | CCGGGTAGATGGAAGGGTCTATTATCTCGAGATAATAGACCCCTCCATCTACTTTTTG    |
| ZBTB34 | sh3-R | AATTCAAAAAGTAGATGGAAGGGTCTATTATCTCGAGATAATAGACCCCTCCATCTAC    |
|        | sh1-F | CCGGTTGTCCGCTTAACTTTATTCTCGAGAAATAAGGTTAAGACGGCAATTTTTTTG     |
|        | sh1-R | AATTCAAAAATTTCCGCTTAACTTTATTCTCGAGAAATAAGGTTAAGACGGACAA       |
|        | sh2-F | CCGGGTGTCTGATGCTCCGATTAAGTCTCGAGTTAATCGGGAGCATCAGACACTTTTTG   |
|        | sh2-R | AATTCAAAAAGTGTCTGATGCTCCGATTAAGTCTCGAGTTAATCGGGAGCATCAGAC     |
|        | sh3-F | CCGGCATGAGCAAGGAGACCTATTGCTCGAGCAATAGGTTCTCTTCTGCTCATTTTTG    |
| ZNF131 | sh3-R | AATTCAAAAACATGAGCAAGGAGACCTATTGCTCGAGCAATAGGTTCTCTTGTCTATG    |
|        | sh1-F | CCGGCCATTGACTTTATGTGATTTCTCGAGAAATCACATAAAGTACAATGGTTTTTTG    |
|        | sh1-R | AATTCAAAAACCATTTGACTTTATGTGATTTCTCGAGAAATCACATAAAGTACAATGG    |
|        | sh2-F | CCGGGTAGTAAGTTCTTCTACAATCTCGAGATTTGTAGAAGAACTTACTACTTTTTTTG   |
|        | sh2-R | AATTCAAAAAGTAGTAAGTTCTTCTACAATCTCGAGATTTGTAGAAGAACTTACTACT    |
|        | sh1-F | CCGGCAGTGAAGTTGACAGATTTAGCTCGAGCTAAATCTGTCAACTTCACTGTTTTTTG   |
| ZBTB37 | sh1-R | AATTCAAAAACAGTGAAGTTGACAGATTTAGCTCGAGCTAAATCTGTCAACTTCACTG    |
|        | sh2-F | CCGGTCTGTTACACAGGGCGGATATCTCGAGATATCCGCCCTGTGTAAACAGATTTTTG   |
|        | sh2-R | AATTCAAAAATCTGTTACACAGGGCGGATATCTCGAGATATCCGCCCTGTGTAAACAGA   |
|        | sh3-F | CCGGCGGAGTGATGATGAAGTTAGACTCGAGTCTAACTTCACTCATCACTCCGTTTTTTG  |
|        | sh3-R | AATTCAAAAACGGAGTGATGATGAAGTTAGACTCGAGTCTAACTTCACTCATCACTCCG   |
|        | sh1-F | CCGGCCTAGTGTCTATCCGTATAAAGTCTCGAGTTTATACGGATAGACACTAGGTTTTTTG |
| ZBTB38 | sh1-R | AATTCAAAAACCTAGTGTCTATCCGTATAAAGTCTCGAGTTTATACGGATAGACACTAGG  |
|        | sh2-F | CCGGATCACGAGCAGAGGCATATTCTCGAGGAATATGCCTCTGCTCGTATTTTTTTG     |
|        | sh2-R | AATTCAAAAATCACGAGCAGAGGCATATTCTCGAGGAATATGCCTCTGCTCGTATG      |
|        | sh3-F | CCGGGTATCCAACCTTAGAGGTTAATCTCGAGATTAACCTTAAGTTGGATACTTTTTTTG  |
|        | sh3-R | AATTCAAAAAGTATCCAACCTTAGAGGTTAATCTCGAGATTAACCTTAAGTTGGATACT   |
|        | sh1-F | CCGGCACCCGACGGGATGGAATATTCTCGAGAAATATCCATCCCGTCCGGTTTTTTG     |
| ZBTB39 | sh1-R | AATTCAAAAACCCGACGGGATGGAATATTCTCGAGAAATATCCATCCCGTCCGGTT      |
|        | sh2-F | CCGGTCTGTCCACATTTGGTATTCTCGAGAAATACCAATGTGGGACAGGATTTTTTTG    |
|        | sh2-R | AATTCAAAAATCTGTCCACATTTGGTATTCTCGAGAAATACCAATGTGGGACAGGA      |
|        | sh3-F | CCGGCCAATGTAAGGTGTGCCACAACCTCGAGTTGTGGCACACCTTACATTTGTTTTTTG  |
|        | sh3-R | AATTCAAAAACCAATGTAAGGTGTGCCACAACCTCGAGTTGTGGCACACCTTACATTTG   |
|        | sh1-F | CCGGACGTGGAAGGTGAGTAATAAAGTCTCGAGTTTATTACTCACCTTCCAGTTTTTTG   |
| ZBTB40 | sh1-R | AATTCAAAAACGTGGAAGGTGAGTAATAAAGTCTCGAGTTTATTACTCACCTTCCAGTT   |
|        | sh2-F | CCGGACACAGCTGAGACCTATTATGCTCGAGCATAATAGGTTCTCAGCTGTGTTTTTTG   |

|        |       |                                                                |
|--------|-------|----------------------------------------------------------------|
|        | sh2-R | AATTCAAAAACACAGCTGAGACCTATTATGCTCGAGCATAATAGGTCTCAGCTGTGT      |
|        | sh3-F | CCGGACCCACCACCCTGACGTATTTCTCGAGAAATACGTCAGGGTGGTGGGTTTTTTG     |
|        | sh3-R | AATTCAAAAACCCACCACCCTGACGTATTTCTCGAGAAATACGTCAGGGTGGTGGG       |
| ZBTB41 | sh1-F | CCGGGATCCATCTAGGCTATCATAACTCGAGTTATGATAGCCTAGATGGATCTTTTTG     |
|        | sh1-R | AATTCAAAAAGATCCATCTAGGCTATCATAACTCGAGTTATGATAGCCTAGATGGATC     |
|        | sh2-F | CCGGGCAGTGTCTAAATGTGATAACTCGAGTTATCACATTTAGGACACTGCTTTTTG      |
|        | sh2-R | AATTCAAAAAGCAGTGTCTAAATGTGATAACTCGAGTTATCACATTTAGGACACTGC      |
|        | sh3-F | CCGGATCACGGTTTGCTCGGTTAAACTCGAGTTAAACCGAGCAAACCGTGATTTTTG      |
|        | sh3-R | AATTCAAAAATCACGGTTTGCTCGGTTAAACTCGAGTTAAACCGAGCAAACCGTGAT      |
| ZBTB42 | sh1-F | CCGGCCAGCCAAGTCTACGTTATTTCTCGAGAAATAACGTAGACTTGGCTGGTTTTG      |
|        | sh1-R | AATTCAAAAACGAGCCAAGTCTACGTTATTTCTCGAGAAATAACGTAGACTTGGCTGG     |
|        | sh2-F | CCGGCGTTGTGCAGCAAGCTGTTTCTCGAGGAAACAGCTTGGCTGCACAACGTTTTG      |
|        | sh2-R | AATTCAAAAAGCTTGTGCAGCAAGCTGTTTCTCGAGGAAACAGCTTGGCTGCACAACG     |
|        | sh3-F | CCGGGCGTCTACTTCCATCTCTCTCTCGAGAGAAGAGATGGAAGTAGACGCTTTTTG      |
|        | sh3-R | AATTCAAAAAGCTTACTTCCATCTCTCTCTCGAGAGAAGAGATGGAAGTAGACGCT       |
| ZBTB43 | sh1-F | CCGGCCAAGCAGCAGTAGTTATAATCTCGAGATTATAACTACTGCTGCTTGGTTTTG      |
|        | sh1-R | AATTCAAAAACCAAGCAGCAGTAGTTATAATCTCGAGATTATAACTACTGCTGCTTGG     |
|        | sh2-F | CCGGGCAGGTTACAGTGAGAATATTCTCGAGAAATTTCTCACTGTAACCTGCTTTTTG     |
|        | sh2-R | AATTCAAAAAGCAGGTTACAGTGAGAATATTCTCGAGAAATTTCTCACTGTAACCTG      |
|        | sh3-F | CCGGGCTCTAAGTAGGCCAATTAAGTAACTCGAGTTAATTGGCCTACTTAGAGCTTTG     |
|        | sh3-R | AATTCAAAAAGCTCTAAGTAGGCCAATTAAGTAACTCGAGTTAATTGGCCTACTTAGAG    |
| ZBTB44 | sh1-F | CCGGCGGTAGAAGAATGGCTGATTACTCGAGTAATCAGCCATTCTTCTACCGTTTTG      |
|        | sh1-R | AATTCAAAAAGCAGTAGAAGAATGGCTGATTACTCGAGTAATCAGCCATTCTTCTACCG    |
|        | sh2-F | CCGGGTCTAGATGCTGGACAAGAACTCGAGTTTCTTGTCCAGCATCTAGACTTTTTG      |
|        | sh2-R | AATTCAAAAAGTCTAGATGCTGGACAAGAACTCGAGTTTCTTGTCCAGCATCTAGAC      |
| ZBTB45 | sh1-F | CCGGGACGAATGCACGCAGATTATCCTCGAGGATAATCTCGGTGCATTCTGCTTTTTG     |
|        | sh1-R | AATTCAAAAAGCAGTAATGCACGCAGATTATCCTCGAGGATAATCTCGGTGCATTCTG     |
|        | sh2-F | CCGGGCTTCGCATACAGACAGTTATCTCGAGATAACTGTCTGTATGCGAAGCTTTTTG     |
|        | sh2-R | AATTCAAAAAGCTTCGCATACAGACAGTTATCTCGAGATAACTGTCTGTATGCGAAG      |
|        | sh3-F | CCGGGTATTTCCAGACAGCTATGTAAGTAACTCGAGTACATAGCTGTCTGAAACTTTTTG   |
|        | sh3-R | AATTCAAAAAGTATTTCCAGACAGCTATGTAAGTAACTCGAGTACATAGCTGTCTGAA     |
| ZBTB46 | sh1-F | CCGGGCTACTTCAAGACGCTCTACTCTCGAGAGTAGAGCGTCTTGAAGTAGCTTTTTG     |
|        | sh1-R | AATTCAAAAAGTACTTCAAGACGCTCTACTCTCGAGAGTAGAGCGTCTTGAAGTAGC      |
|        | sh2-F | CCGGCGGTGCAGTACAGAATCTTTCTCGAGAAAGAGTTCTGTACTGCACCGTTTTG       |
|        | sh2-R | AATTCAAAAAGGTCAGTACAGAATCTTTCTCGAGAAAGAGTTCTGTACTGCACCG        |
| ZBTB47 | sh1-F | CCGGCCATGAGCATAACAAGATTGTCTCGAGACAACTTGTATGCTCATGGTTTTG        |
|        | sh1-R | AATTCAAAAACCATGAGCATAACAAGATTGTCTCGAGACAACTTGTATGCTCATGG       |
|        | sh2-F | CCGGGAAGAAGTTCTCATGCGAGATCTCGAGATCTCGCATGAGAATCTTCTTTTTG       |
|        | sh2-R | AATTCAAAAAGAAGAAGTTCTCATGCGAGATCTCGAGATCTCGCATGAGAATCTTCT      |
|        | sh3-F | CCGGGTACACATGAGCATCCACATCTCGAGATGTGGATGCTCATGTGTGACTTTTTG      |
|        | sh3-R | AATTCAAAAAGTCACATGAGCATCCACATCTCGAGATGTGGATGCTCATGTGTGAC       |
| ZBTB48 | sh1-F | CCGGCGACCGGGTAGAGAATCAACTCGAGTTGTAGTTCTTACCCGGTCTTTTTG         |
|        | sh1-R | AATTCAAAAAGCAGCGGCTAGAGAATCAACTCGAGTTGTAGTTCTTACCCGGTCT        |
|        | sh2-F | CCGGCTGGCTTCGCTGAGATCTTTGCTCGAGCAAAGATCTCAGCGAAGCCAGTTTTG      |
| ZBTB49 | sh2-R | AATTCAAAAACTGGCTTCGCTGAGATCTTTGCTCGAGCAAAGATCTCAGCGAAGCCAG     |
|        | sh1-F | CCGGGACGTCCAGCGTCACATTATTCTCGAGAAATAATGTGACGCTGGACGCTTTTTG     |
|        | sh1-R | AATTCAAAAAGACGTCCAGCGTCACATTATTCTCGAGAAATAATGTGACGCTGGACG      |
| AXL    | sh2-F | CCGGGCCTTTCAAACAGCCAAATTAAGTAACTCGAGTAATTTGGCTGTTTGAAGGCTTTTTG |
|        | sh2-R | AATTCAAAAAGCCTTTCAAACAGCCAAATTAAGTAACTCGAGTAATTTGGCTGTTTGAAG   |
|        | sh1-F | CCGGCCTAAGCATCTAAGTTATAAGCTCGAGCTTATAACTTAGATGCTTAGGTTTTG      |
| AKT    | sh1-R | AATTCAAAAACCTAAGCATCTAAGTTATAAGCTCGAGCTTATAACTTAGATGCTTAGG     |
|        | sh2-F | CCGGCGGTCTGCATGAAGGAATTTCTCGAGAAATTTCTTTCATGCAGACCGCTTTTTG     |
|        | sh2-R | AATTCAAAAAGCGGTCTGCATGAAGGAATTTCTCGAGAAATTTCTTTCATGCAGACCG     |
| MYC    | sh1-F | CCGGCGCTGACCATGAACGAGTTTCTCGAGAAACTCGTTTCATGGTCACGCGTTTTG      |
|        | sh1-R | AATTCAAAAACGCGTACCATGAACGAGTTTCTCGAGAAACTCGTTTCATGGTCACGCG     |
|        | sh1-F | CCGGCCTGAGACAGATCAGCAACAACCTCGAGTTGTTGCTGATCTGTCTCAGGTTTTG     |
|        | sh1-R | AATTCAAAAACCTGAGACAGATCAGCAACAACCTCGAGTTGTTGCTGATCTGTCTCAGG    |

## SI Table S2

**Correlation between average effect of ZBTB depletion on U87 cell growth and differential gene expression (GBM versus Epilepsy)**

| Gene Name              | Log <sub>2</sub> fold change of gene expression (GBM Vs Epilepsy) | Average effect of ZBTB depletion on U87 cell growth |
|------------------------|-------------------------------------------------------------------|-----------------------------------------------------|
| AKT (Positive control) | 0.54                                                              | 0.48                                                |
| BCL6                   | 1.15                                                              | 0.55                                                |
| BCL6B                  | 0.04                                                              | 0.55                                                |
| GZF1                   | -0.08                                                             | 0.71                                                |
| HIC1                   | -0.15                                                             | 0.71                                                |
| HIC2                   | -0.08                                                             | 0.75                                                |
| MYC (Positive control) | 1.38                                                              | 0.72                                                |
| MYNN                   | 0.14                                                              | 1.13                                                |
| PATZ1                  | 0.19                                                              | 0.63                                                |
| ZBTB1                  | 0.48                                                              | 0.80                                                |
| ZBTB10                 | 0.43                                                              | 0.90                                                |
| ZBTB11                 | 0.02                                                              | 0.78                                                |
| ZBTB12                 | -0.05                                                             | 0.75                                                |
| ZBTB14                 | 0.07                                                              | 0.92                                                |
| ZBTB16                 | -0.21                                                             | 0.76                                                |
| ZBTB17                 | -0.04                                                             | 0.86                                                |
| ZBTB18                 | -1.05                                                             | 0.64                                                |
| ZBTB2                  | 0.04                                                              | 0.84                                                |
| ZBTB20                 | 1.12                                                              | 0.67                                                |
| ZBTB21                 | 0.31                                                              | 0.93                                                |
| ZBTB22                 | -0.20                                                             | 0.78                                                |
| ZBTB24                 | -0.04                                                             | 0.99                                                |
| ZBTB25                 | 0.08                                                              | 0.78                                                |
| ZBTB26                 | 0.24                                                              | 0.70                                                |
| ZBTB3                  | -0.20                                                             | 0.86                                                |
| ZBTB32                 | -0.20                                                             | 1.18                                                |
| ZBTB33                 | 0.20                                                              | 1.05                                                |
| ZBTB34                 | -0.16                                                             | 1.34                                                |
| ZBTB37                 | -0.01                                                             | 0.95                                                |
| ZBTB38                 | 0.05                                                              | 1.18                                                |
| ZBTB39                 | 0.14                                                              | 1.02                                                |
| ZBTB4                  | -0.43                                                             | 0.95                                                |
| ZBTB40                 | 0.18                                                              | 0.99                                                |
| ZBTB41                 | -0.39                                                             | 0.98                                                |
| ZBTB42                 | 0.65                                                              | 0.60                                                |
| ZBTB43                 | 0.08                                                              | 0.98                                                |
| ZBTB44                 | -0.56                                                             | 0.81                                                |
| ZBTB45                 | 0.03                                                              | 0.88                                                |
| ZBTB46                 | -0.24                                                             | 0.82                                                |
| ZBTB47                 | -0.33                                                             | 0.62                                                |
| ZBTB48                 | 0.13                                                              | 1.16                                                |
| ZBTB49                 | -0.02                                                             | 1.02                                                |
| ZBTB5                  | 0.31                                                              | 0.58                                                |
| ZBTB6                  | -0.01                                                             | 1.06                                                |
| ZBTB7A                 | -0.31                                                             | 0.97                                                |
| ZBTB7B                 | -0.11                                                             | 0.87                                                |
| ZBTB7C                 | -0.06                                                             | 1.15                                                |
| ZBTB8A                 | 0.50                                                              | 1.12                                                |
| ZBTB8B                 | 0.20                                                              | 1.21                                                |
| ZBTB9                  | 0.24                                                              | 1.01                                                |
| ZNF131                 | 0.30                                                              | 1.31                                                |

## SI Table S3

### Differential gene expression after BCL6 knockdown in U87 cells

| PROBE ID     | Gene         | log2 Fold Change | Average Expression | p-value | FDR  |
|--------------|--------------|------------------|--------------------|---------|------|
| ILMN_1671353 | IL12A        | -1.06            | 6.55               | 0.00    | 0.00 |
| ILMN_1772612 | ANGPTL2      | 1.21             | 9.04               | 0.00    | 0.00 |
| ILMN_2110908 | MYC          | -1.00            | 8.26               | 0.00    | 0.00 |
| ILMN_1737314 | BCL6         | -0.96            | 8.90               | 0.00    | 0.00 |
| ILMN_1687301 | VCAN         | 0.88             | 9.45               | 0.00    | 0.00 |
| ILMN_1680618 | MYC          | -0.93            | 9.86               | 0.00    | 0.00 |
| ILMN_1768505 | IL13RA1      | -0.95            | 10.86              | 0.00    | 0.00 |
| ILMN_3246214 | B3GNT1       | -0.73            | 9.43               | 0.00    | 0.00 |
| ILMN_1757406 | HIST1H1C     | 0.74             | 9.91               | 0.00    | 0.01 |
| ILMN_1699856 | RALGDS       | 0.68             | 9.75               | 0.00    | 0.01 |
| ILMN_1690170 | CRABP2       | 0.86             | 8.85               | 0.00    | 0.02 |
| ILMN_1771841 | FOSL1        | -0.64            | 10.57              | 0.00    | 0.02 |
| ILMN_2182750 | DDX1         | -0.59            | 11.58              | 0.00    | 0.03 |
| ILMN_1684755 | KAZALD1      | 0.58             | 6.73               | 0.00    | 0.03 |
| ILMN_1703374 | NAV1         | 0.62             | 7.92               | 0.00    | 0.03 |
| ILMN_3235647 | SIK1         | -0.57            | 6.42               | 0.00    | 0.04 |
| ILMN_1721833 | IER5         | 0.70             | 8.69               | 0.00    | 0.04 |
| ILMN_1812926 | ANTXR2       | -0.66            | 8.20               | 0.00    | 0.05 |
| ILMN_1764383 | MCOLN1       | 0.54             | 8.73               | 0.00    | 0.05 |
| ILMN_3251560 | TMEM167A     | -2.74            | 8.70               | 0.00    | 0.00 |
| ILMN_1775501 | IL1B         | -2.67            | 7.23               | 0.00    | 0.00 |
| ILMN_1767475 | CERK         | -2.31            | 8.75               | 0.00    | 0.00 |
| ILMN_2371379 | ACLY         | -2.29            | 10.69              | 0.00    | 0.00 |
| ILMN_2059505 | ARPP19       | -2.21            | 8.85               | 0.00    | 0.00 |
| ILMN_2396020 | DUSP6        | -2.30            | 8.08               | 0.00    | 0.00 |
| ILMN_2388975 | CERK         | -1.94            | 7.93               | 0.00    | 0.00 |
| ILMN_1776216 | MMGT1        | -2.43            | 9.27               | 0.00    | 0.00 |
| ILMN_1659801 | ATP6V1C1     | -1.89            | 7.97               | 0.00    | 0.00 |
| ILMN_1698179 | TAGLN3       | -1.99            | 7.05               | 0.00    | 0.00 |
| ILMN_1760676 | MORF4L1      | -1.87            | 10.68              | 0.00    | 0.00 |
| ILMN_1775170 | MT1X         | -1.77            | 12.96              | 0.00    | 0.00 |
| ILMN_1773865 | HSPA5        | -2.08            | 8.91               | 0.00    | 0.00 |
| ILMN_1859946 |              | -1.73            | 9.85               | 0.00    | 0.00 |
| ILMN_3237986 | MMGT1        | -2.15            | 7.93               | 0.00    | 0.00 |
| ILMN_1697024 | LOC730432    | -1.96            | 8.08               | 0.00    | 0.00 |
| ILMN_2217329 | IAH1         | -1.84            | 9.75               | 0.00    | 0.00 |
| ILMN_3258424 | LOC100129118 | -1.91            | 9.53               | 0.00    | 0.00 |
| ILMN_1659952 | MTMR2        | -1.70            | 7.37               | 0.00    | 0.00 |
| ILMN_1749014 | ACLY         | -1.78            | 9.69               | 0.00    | 0.00 |
| ILMN_2392189 | CTDSPL       | -1.59            | 8.09               | 0.00    | 0.00 |
| ILMN_2081398 | KIF3B        | -1.68            | 7.79               | 0.00    | 0.00 |
| ILMN_2061950 | RABGAP1      | -1.72            | 8.46               | 0.00    | 0.00 |
| ILMN_1680774 | LOC730994    | -1.76            | 7.85               | 0.00    | 0.00 |
| ILMN_2216157 | GNA12        | -1.62            | 8.44               | 0.00    | 0.00 |
| ILMN_1772798 | ARPP19       | -1.69            | 7.40               | 0.00    | 0.00 |
| ILMN_1704305 | NIP7         | -1.65            | 9.04               | 0.00    | 0.00 |
| ILMN_2162989 | TMEM189      | -1.54            | 8.65               | 0.00    | 0.00 |
| ILMN_3245659 | ERI1         | -1.51            | 7.98               | 0.00    | 0.00 |
| ILMN_1700549 | ERLIN2       | -1.76            | 7.73               | 0.00    | 0.00 |
| ILMN_1776325 | UBE2Q1       | -1.60            | 7.58               | 0.00    | 0.00 |
| ILMN_1673566 | ADAMTS1      | -1.53            | 8.70               | 0.00    | 0.00 |
| ILMN_1723007 | ZCCHC9       | -1.46            | 9.94               | 0.00    | 0.00 |
| ILMN_1777139 | MAK16        | -1.68            | 7.82               | 0.00    | 0.00 |
| ILMN_1811921 | CSRP1        | -1.45            | 10.36              | 0.00    | 0.00 |
| ILMN_1691181 | TMX1         | -1.70            | 9.26               | 0.00    | 0.00 |
| ILMN_2053679 | ACADM        | -1.37            | 9.11               | 0.00    | 0.00 |
| ILMN_2150856 | SERPINB2     | -1.67            | 6.71               | 0.00    | 0.00 |
| ILMN_1764788 | TNFRSF1B     | -1.60            | 8.35               | 0.00    | 0.00 |
| ILMN_2121408 | HBEGF        | -1.52            | 7.99               | 0.00    | 0.00 |
| ILMN_1685079 | TELO2        | 1.49             | 7.56               | 0.00    | 0.00 |
| ILMN_1740415 | WFDC3        | -1.37            | 8.31               | 0.00    | 0.00 |
| ILMN_1707727 | ANGPTL4      | -2.14            | 7.35               | 0.00    | 0.00 |
| ILMN_3305111 | LOC728510    | -1.42            | 7.93               | 0.00    | 0.00 |
| ILMN_2388155 | CASP3        | -1.31            | 8.27               | 0.00    | 0.00 |
| ILMN_1697069 | CSF3         | -1.33            | 7.24               | 0.00    | 0.00 |
| ILMN_2100689 | MAP2K4       | -1.43            | 7.56               | 0.00    | 0.00 |
| ILMN_1778599 | SP140        | -1.34            | 8.15               | 0.00    | 0.00 |
| ILMN_1689665 | NAE1         | -1.39            | 10.51              | 0.00    | 0.00 |
| ILMN_3307483 | MCF2L        | 1.45             | 8.71               | 0.00    | 0.00 |
| ILMN_2415439 | NAE1         | -1.51            | 8.50               | 0.00    | 0.00 |
| ILMN_1780334 | KCNJ2        | 1.44             | 7.71               | 0.00    | 0.00 |
| ILMN_1726421 | METTTL9      | -1.43            | 7.45               | 0.00    | 0.00 |
| ILMN_2322768 | CSF3         | -1.30            | 6.71               | 0.00    | 0.00 |
| ILMN_1711786 | NFE2         | 1.27             | 6.66               | 0.00    | 0.00 |
| ILMN_2374340 | PLAUR        | -1.28            | 9.99               | 0.00    | 0.00 |
| ILMN_1666384 | LOC151579    | -1.29            | 9.99               | 0.00    | 0.00 |

|              |              |       |       |      |      |
|--------------|--------------|-------|-------|------|------|
| ILMN_2408543 | PLAUR        | -1.30 | 8.93  | 0.00 | 0.00 |
| ILMN_1788356 | C11orf17     | -1.27 | 8.89  | 0.00 | 0.00 |
| ILMN_2070896 | BMPR2        | -1.43 | 6.82  | 0.00 | 0.00 |
| ILMN_1673113 | F2RL1        | -1.37 | 7.30  | 0.00 | 0.00 |
| ILMN_2308903 | WFDC3        | -1.27 | 9.52  | 0.00 | 0.00 |
| ILMN_3241173 | LOC100134230 | -1.29 | 6.91  | 0.00 | 0.00 |
| ILMN_1702279 | KIF3B        | -1.49 | 8.11  | 0.00 | 0.00 |
| ILMN_1713496 | ST3GAL5      | 1.24  | 7.59  | 0.00 | 0.00 |
| ILMN_1676548 | BZW2         | -1.25 | 10.03 | 0.00 | 0.00 |
| ILMN_2128795 | LRIG1        | -1.38 | 7.83  | 0.00 | 0.00 |
| ILMN_1760954 | DENR         | -1.28 | 10.36 | 0.00 | 0.00 |
| ILMN_1802669 | PPP3CB       | -1.30 | 8.32  | 0.00 | 0.00 |
| ILMN_1764163 | LOC644330    | -1.21 | 7.65  | 0.00 | 0.00 |
| ILMN_1691930 | CBX6         | 1.21  | 9.45  | 0.00 | 0.00 |
| ILMN_1656111 | MYLIP        | 1.22  | 7.22  | 0.00 | 0.00 |
| ILMN_2174369 | ELOVL5       | -1.35 | 8.75  | 0.00 | 0.00 |
| ILMN_1655921 | GTF2E1       | -1.20 | 7.52  | 0.00 | 0.00 |
| ILMN_1767837 | GOLT1B       | -1.34 | 8.40  | 0.00 | 0.00 |
| ILMN_1741021 | CH25H        | 1.38  | 7.61  | 0.00 | 0.00 |
| ILMN_1677092 | GEM          | -1.31 | 9.38  | 0.00 | 0.00 |
| ILMN_1803279 | TMED5        | -1.23 | 8.91  | 0.00 | 0.00 |
| ILMN_1762899 | EGR1         | -1.30 | 7.74  | 0.00 | 0.00 |
| ILMN_1743299 | PXMP3        | -1.47 | 7.86  | 0.00 | 0.00 |
| ILMN_1778836 | SFRS7        | -1.18 | 9.39  | 0.00 | 0.00 |
| ILMN_1733998 | DHRS9        | -1.30 | 7.49  | 0.00 | 0.00 |
| ILMN_2189869 | FCF1         | -1.16 | 6.72  | 0.00 | 0.00 |
| ILMN_2380418 | BICD2        | -1.17 | 8.53  | 0.00 | 0.00 |
| ILMN_1743677 | HNRNPU       | -1.20 | 7.48  | 0.00 | 0.00 |
| ILMN_2234697 | BEX1         | -2.16 | 8.36  | 0.00 | 0.00 |
| ILMN_1700168 | LARS2        | -1.21 | 7.76  | 0.00 | 0.00 |
| ILMN_1752988 | C11orf17     | -1.16 | 9.84  | 0.00 | 0.00 |
| ILMN_1701877 | AXL          | -1.21 | 11.15 | 0.00 | 0.00 |
| ILMN_1662640 | C20orf127    | -1.21 | 10.53 | 0.00 | 0.00 |
| ILMN_2123567 | SENP2        | -1.15 | 8.07  | 0.00 | 0.00 |
| ILMN_2349459 | BIRC5        | -1.17 | 9.31  | 0.00 | 0.00 |
| ILMN_1707342 | LRIG1        | -1.17 | 7.10  | 0.00 | 0.00 |
| ILMN_1737813 | PRNPIP       | -1.15 | 8.73  | 0.00 | 0.00 |
| ILMN_1655595 | SERPINE2     | -1.17 | 11.53 | 0.00 | 0.00 |
| ILMN_1794803 | NDP          | -1.55 | 9.94  | 0.00 | 0.00 |
| ILMN_1752965 | GREM1        | -1.64 | 8.73  | 0.00 | 0.00 |
| ILMN_1686388 | LOC644330    | -1.20 | 8.55  | 0.00 | 0.00 |
| ILMN_1764043 | TTL          | -1.13 | 9.81  | 0.00 | 0.00 |
| ILMN_2136089 | MTE          | -1.36 | 11.27 | 0.00 | 0.00 |
| ILMN_1760121 | RRAGC        | -1.19 | 9.53  | 0.00 | 0.00 |
| ILMN_1678612 | ANXA6        | -1.10 | 7.31  | 0.00 | 0.00 |
| ILMN_1757497 | VGf          | -1.16 | 11.88 | 0.00 | 0.00 |
| ILMN_1699160 | ITK          | -1.14 | 7.32  | 0.00 | 0.00 |
| ILMN_2061732 | YRDC         | -1.22 | 9.68  | 0.00 | 0.00 |
| ILMN_1704154 | TNFRSF19     | -1.11 | 7.41  | 0.00 | 0.00 |
| ILMN_1753607 | PNO1         | -1.15 | 8.31  | 0.00 | 0.00 |
| ILMN_1800512 | HMOX1        | -1.23 | 11.31 | 0.00 | 0.00 |
| ILMN_1699476 | RPE          | -1.11 | 9.51  | 0.00 | 0.00 |
| ILMN_2160929 | FEN1         | -1.12 | 11.13 | 0.00 | 0.00 |
| ILMN_1766222 | LARP4B       | -1.11 | 8.48  | 0.00 | 0.00 |
| ILMN_1719064 | KCTD10       | -1.25 | 7.31  | 0.00 | 0.00 |
| ILMN_1742813 | TMEM167A     | -1.21 | 8.34  | 0.00 | 0.00 |
| ILMN_1753525 | TCEAL7       | -1.33 | 9.62  | 0.00 | 0.00 |
| ILMN_1678671 | KLHL24       | 1.14  | 8.09  | 0.00 | 0.00 |
| ILMN_2078592 | C6orf105     | -1.15 | 6.57  | 0.00 | 0.00 |
| ILMN_1743034 | KIF1B        | -1.10 | 7.56  | 0.00 | 0.00 |
| ILMN_2105919 | FGF2         | -1.09 | 7.37  | 0.00 | 0.00 |
| ILMN_1792256 | TBX2         | -1.07 | 8.36  | 0.00 | 0.00 |
| ILMN_1801121 | SENP2        | -1.08 | 7.38  | 0.00 | 0.00 |
| ILMN_1655734 | RPF1         | -1.06 | 7.48  | 0.00 | 0.00 |
| ILMN_2387385 | IGFBP1       | -1.75 | 8.17  | 0.00 | 0.00 |
| ILMN_1775304 | DNAJB1       | -1.11 | 9.32  | 0.00 | 0.00 |
| ILMN_1771697 | VRK3         | -1.05 | 9.59  | 0.00 | 0.00 |
| ILMN_1704446 | SLC6A10P     | -1.12 | 9.15  | 0.00 | 0.00 |
| ILMN_1654262 | ZMAT3        | 1.34  | 10.99 | 0.00 | 0.00 |
| ILMN_2359029 | C11orf17     | -1.10 | 8.41  | 0.00 | 0.00 |
| ILMN_2150851 | SERPINB2     | -1.52 | 7.01  | 0.00 | 0.00 |
| ILMN_1693338 | CYP1B1       | 1.22  | 11.77 | 0.00 | 0.00 |
| ILMN_1709674 | GFPT2        | -1.05 | 9.73  | 0.00 | 0.00 |
| ILMN_1790953 | TBCB         | -1.11 | 10.36 | 0.00 | 0.00 |
| ILMN_1758164 | STC1         | -1.49 | 9.84  | 0.00 | 0.00 |
| ILMN_1778104 | ACADM        | -1.13 | 8.47  | 0.00 | 0.00 |
| ILMN_1760160 | STX1A        | -1.16 | 9.06  | 0.00 | 0.00 |
| ILMN_1742382 | RIMS3        | -1.16 | 9.74  | 0.00 | 0.00 |
| ILMN_1815705 | LZTFL1       | -1.11 | 7.38  | 0.00 | 0.00 |
| ILMN_1710906 | RNF145       | -1.02 | 8.45  | 0.00 | 0.00 |
| ILMN_1730416 | CYCS         | -1.14 | 6.79  | 0.00 | 0.00 |
| ILMN_1711608 | SSBP2        | 1.08  | 8.78  | 0.00 | 0.00 |
| ILMN_3306997 | METTL1       | -1.03 | 9.26  | 0.00 | 0.00 |
| ILMN_1748291 | C1orf55      | -1.10 | 7.59  | 0.00 | 0.00 |
| ILMN_2274586 | PKD1L2       | 1.16  | 7.98  | 0.00 | 0.00 |
| ILMN_1865764 |              | 1.11  | 10.44 | 0.00 | 0.00 |



|              |           |       |       |      |      |
|--------------|-----------|-------|-------|------|------|
| ILMN_1760315 | VWCE      | 1.09  | 7.42  | 0.00 | 0.00 |
| ILMN_1789095 | BMPR2     | -1.08 | 6.55  | 0.00 | 0.00 |
| ILMN_2048793 | CIAO1     | -1.11 | 9.83  | 0.00 | 0.00 |
| ILMN_1813657 | PHF20     | -1.01 | 7.38  | 0.00 | 0.00 |
| ILMN_1668514 | PIP5K1C   | -1.01 | 7.81  | 0.00 | 0.00 |
| ILMN_1750062 | PPARGC1A  | 1.13  | 7.62  | 0.00 | 0.00 |
| ILMN_1815190 | METTL1    | -1.03 | 8.50  | 0.00 | 0.00 |
| ILMN_1751097 | CREB3L2   | -1.05 | 10.27 | 0.00 | 0.00 |
| ILMN_1697567 | TPM3      | -1.25 | 9.46  | 0.00 | 0.00 |
| ILMN_1808374 | SNTB2     | -1.03 | 9.85  | 0.00 | 0.00 |
| ILMN_1799889 | ATP6V0D2  | -1.03 | 6.56  | 0.00 | 0.00 |
| ILMN_2382942 | CA12      | -1.20 | 8.61  | 0.00 | 0.00 |
| ILMN_1682775 | EDN1      | -1.01 | 5.90  | 0.00 | 0.00 |
| ILMN_2364022 | SLC16A3   | -1.12 | 10.07 | 0.00 | 0.00 |
| ILMN_1691112 | PIGN      | -1.03 | 7.77  | 0.00 | 0.00 |
| ILMN_2372316 | PKD1L2    | 0.98  | 6.74  | 0.00 | 0.00 |
| ILMN_1656194 | TSPAN10   | 1.14  | 10.74 | 0.00 | 0.00 |
| ILMN_2401933 | ATP2B1    | -0.98 | 6.63  | 0.00 | 0.00 |
| ILMN_1720998 | CA12      | -1.29 | 11.04 | 0.00 | 0.00 |
| ILMN_1660775 | LOC650152 | -0.98 | 12.73 | 0.00 | 0.00 |
| ILMN_2359907 | CD68      | -1.05 | 10.60 | 0.00 | 0.00 |
| ILMN_1765796 | ENO2      | -1.05 | 10.50 | 0.00 | 0.00 |
| ILMN_1681886 | ADAMTS5   | -1.03 | 6.97  | 0.00 | 0.00 |
| ILMN_2242937 | ARSB      | -0.96 | 7.31  | 0.00 | 0.00 |
| ILMN_1729117 | COL5A2    | 1.01  | 9.38  | 0.00 | 0.00 |
| ILMN_1703955 | FBXO32    | 1.04  | 11.98 | 0.00 | 0.00 |
| ILMN_1774083 | TRIAP1    | -1.13 | 9.14  | 0.00 | 0.00 |
| ILMN_2364521 | AXL       | -0.95 | 10.66 | 0.00 | 0.00 |
| ILMN_1740466 | FAM46A    | 0.98  | 10.28 | 0.00 | 0.00 |
| ILMN_2367883 | GEM       | -0.96 | 9.47  | 0.00 | 0.00 |
| ILMN_2100693 | MAP2K4    | -0.97 | 6.73  | 0.00 | 0.00 |
| ILMN_1778673 | GOLGA7    | -0.96 | 10.22 | 0.00 | 0.00 |
| ILMN_1732772 | PPME1     | -0.96 | 8.05  | 0.00 | 0.00 |
| ILMN_3247882 | ERI3      | -0.99 | 8.52  | 0.00 | 0.00 |
| ILMN_1728083 | EIF4EBP2  | -1.03 | 7.16  | 0.00 | 0.00 |
| ILMN_1676719 | LOC644330 | -1.13 | 7.99  | 0.00 | 0.00 |
| ILMN_1666444 | RBMS1     | -0.98 | 9.67  | 0.00 | 0.00 |
| ILMN_1755834 | FEN1      | -0.94 | 8.75  | 0.00 | 0.00 |
| ILMN_2124802 | MT1H      | -1.23 | 8.49  | 0.00 | 0.00 |
| ILMN_1663640 | MAOA      | -1.60 | 8.01  | 0.00 | 0.00 |
| ILMN_1796925 | CXADR     | 0.98  | 8.87  | 0.00 | 0.00 |
| ILMN_2173611 | MT1E      | -1.01 | 13.24 | 0.00 | 0.00 |
| ILMN_1741171 | TM2D2     | -0.94 | 6.95  | 0.00 | 0.00 |
| ILMN_1653856 | STS-1     | -0.94 | 7.91  | 0.00 | 0.00 |
| ILMN_2237428 | SCD5      | -1.03 | 6.37  | 0.00 | 0.00 |
| ILMN_2348788 | CD44      | -1.29 | 9.61  | 0.00 | 0.00 |
| ILMN_1803429 | CD44      | -1.07 | 12.57 | 0.00 | 0.00 |
| ILMN_1713143 | MRPL3     | -0.96 | 11.20 | 0.00 | 0.00 |
| ILMN_1652280 | FBXO32    | 0.98  | 11.34 | 0.00 | 0.00 |
| ILMN_1790757 | ADSL      | -0.95 | 10.80 | 0.00 | 0.00 |
| ILMN_1705579 | MPP4      | -1.28 | 6.59  | 0.00 | 0.00 |
| ILMN_1802109 | KBTD9     | -0.92 | 7.60  | 0.00 | 0.00 |
| ILMN_3178406 | KLHL29    | -1.03 | 8.53  | 0.00 | 0.00 |
| ILMN_1769911 | SLC38A1   | -0.92 | 10.12 | 0.00 | 0.00 |
| ILMN_1706118 | HN1L      | -0.92 | 6.76  | 0.00 | 0.00 |
| ILMN_2205935 | SFXN1     | -1.16 | 7.82  | 0.00 | 0.00 |
| ILMN_1726786 | TNRC6B    | 1.05  | 8.25  | 0.00 | 0.00 |
| ILMN_1704876 | USP38     | -0.92 | 7.43  | 0.00 | 0.00 |
| ILMN_2086105 | SPRY4     | -0.96 | 6.64  | 0.00 | 0.00 |
| ILMN_1813669 | ANKS1A    | -0.93 | 7.43  | 0.00 | 0.00 |
| ILMN_1760620 | TMEM33    | -0.93 | 6.87  | 0.00 | 0.00 |
| ILMN_1753111 | NAMPT     | -1.08 | 9.37  | 0.00 | 0.00 |
| ILMN_2189870 | FCF1      | -1.03 | 7.07  | 0.00 | 0.00 |
| ILMN_1810844 | RARRES2   | 0.95  | 6.88  | 0.00 | 0.00 |
| ILMN_1732923 | SIPA1L2   | 0.93  | 8.83  | 0.00 | 0.00 |
| ILMN_1666713 | LYPLA1    | -1.05 | 7.82  | 0.00 | 0.00 |
| ILMN_1690040 | TM7SF2    | 0.95  | 6.67  | 0.00 | 0.00 |
| ILMN_3239181 | ITPRIP    | -0.96 | 8.97  | 0.00 | 0.00 |
| ILMN_1754531 | AP4E1     | -1.02 | 7.59  | 0.00 | 0.00 |
| ILMN_1722276 | PAFAH1B1  | -1.00 | 9.67  | 0.00 | 0.00 |
| ILMN_1784294 | CPA4      | -1.03 | 9.66  | 0.00 | 0.00 |
| ILMN_1764709 | MAFB      | 0.92  | 8.63  | 0.00 | 0.00 |
| ILMN_1672565 | RG9MTD1   | -0.96 | 7.64  | 0.00 | 0.00 |
| ILMN_2096012 | UHMK1     | -1.01 | 6.97  | 0.00 | 0.00 |
| ILMN_1680091 | POP7      | -1.02 | 8.63  | 0.00 | 0.00 |
| ILMN_1708537 | RBPJ      | -1.03 | 7.58  | 0.00 | 0.00 |
| ILMN_1775042 | WDR69     | -0.93 | 6.42  | 0.00 | 0.00 |
| ILMN_1800626 | SESN1     | 1.12  | 7.73  | 0.00 | 0.00 |
| ILMN_1677466 | DUSP6     | -1.40 | 6.17  | 0.00 | 0.00 |
| ILMN_1779252 | TRIM22    | 0.90  | 8.62  | 0.00 | 0.00 |
| ILMN_1790577 | SLC35F2   | -0.91 | 7.99  | 0.00 | 0.00 |
| ILMN_1749071 | CNIH3     | -0.89 | 7.19  | 0.00 | 0.00 |
| ILMN_2129505 | CYBASC3   | 1.00  | 9.80  | 0.00 | 0.00 |
| ILMN_2041190 | F2RL1     | -1.18 | 7.41  | 0.00 | 0.00 |
| ILMN_1749405 | KIAA1191  | -0.98 | 9.44  | 0.00 | 0.00 |
| ILMN_1679655 | WDR82     | -0.94 | 9.05  | 0.00 | 0.00 |

|              |                |       |       |      |      |
|--------------|----------------|-------|-------|------|------|
| ILMN_1681301 | AIM2           | -0.99 | 9.58  | 0.00 | 0.00 |
| ILMN_1786328 | WDR40A         | -0.88 | 8.53  | 0.00 | 0.00 |
| ILMN_1685703 | ACOX2          | -1.02 | 9.72  | 0.00 | 0.00 |
| ILMN_1703852 | EFNB2          | -1.13 | 9.22  | 0.00 | 0.00 |
| ILMN_1776653 | SCML1          | 0.89  | 8.93  | 0.00 | 0.00 |
| ILMN_1707695 | IFIT1          | 0.92  | 7.45  | 0.00 | 0.00 |
| ILMN_1718766 | MT1F           | -0.91 | 11.81 | 0.00 | 0.00 |
| ILMN_1805192 | ITPRIP         | -0.89 | 9.03  | 0.00 | 0.00 |
| ILMN_2188264 | CYR61          | -0.97 | 7.45  | 0.00 | 0.00 |
| ILMN_1726930 | C5orf44        | -0.89 | 7.05  | 0.00 | 0.00 |
| ILMN_1745368 | TMEM50A        | -0.92 | 7.88  | 0.00 | 0.00 |
| ILMN_1741219 | RRAGB          | 0.94  | 8.15  | 0.00 | 0.00 |
| ILMN_1781285 | DUSP1          | -0.98 | 9.98  | 0.00 | 0.00 |
| ILMN_1697054 | LRRN4CL        | 0.90  | 6.14  | 0.00 | 0.00 |
| ILMN_1791647 | ASIP           | 0.92  | 6.93  | 0.00 | 0.00 |
| ILMN_1663575 | MGC87042       | -0.91 | 10.86 | 0.00 | 0.00 |
| ILMN_1742789 | LPXN           | -1.01 | 11.19 | 0.00 | 0.00 |
| ILMN_1697409 | TNFRSF14       | 0.89  | 10.10 | 0.00 | 0.00 |
| ILMN_1779374 | AMMECR1        | 1.00  | 8.27  | 0.00 | 0.00 |
| ILMN_1708101 | LMNB2          | -0.92 | 10.75 | 0.00 | 0.00 |
| ILMN_2076463 | SLC15A4        | -1.00 | 9.19  | 0.00 | 0.00 |
| ILMN_1761808 | MCFD2          | -0.97 | 9.09  | 0.00 | 0.00 |
| ILMN_2075189 | SLC35F2        | -0.87 | 8.73  | 0.00 | 0.00 |
| ILMN_1654060 | MKNK2          | 0.91  | 6.48  | 0.00 | 0.00 |
| ILMN_1697220 | NT5E           | -0.94 | 10.70 | 0.00 | 0.00 |
| ILMN_1802519 | VPS36          | 0.87  | 7.78  | 0.00 | 0.00 |
| ILMN_2389590 | PRKAR1A        | -0.86 | 9.39  | 0.00 | 0.00 |
| ILMN_2049536 | TRPV2          | -0.96 | 6.63  | 0.00 | 0.00 |
| ILMN_1806023 | JUN            | -0.89 | 11.08 | 0.00 | 0.00 |
| ILMN_1797359 | TRIM78P        | 0.88  | 7.55  | 0.00 | 0.00 |
| ILMN_1806349 | SLC6A8         | -0.92 | 7.45  | 0.00 | 0.00 |
| ILMN_2149566 | VPS25          | -0.93 | 8.59  | 0.00 | 0.00 |
| ILMN_1676361 | ARHGAP22       | -1.06 | 9.62  | 0.00 | 0.00 |
| ILMN_3295874 | LOC100132805   | -0.87 | 8.11  | 0.00 | 0.00 |
| ILMN_2326591 | ANXA6          | -0.88 | 6.55  | 0.00 | 0.00 |
| ILMN_1801403 | DCUN1D4        | -0.88 | 8.01  | 0.00 | 0.00 |
| ILMN_1756898 | COQ9           | -0.92 |       | 0.00 | 0.00 |
| ILMN_1693345 | CPEB1          | -0.86 | 8.74  | 0.00 | 0.00 |
| ILMN_1878029 |                | 1.08  | 7.80  | 0.00 | 0.00 |
| ILMN_3243156 | AHNAK2         | 0.86  | 10.52 | 0.00 | 0.00 |
| ILMN_1743456 | ZCCHC14        | 0.84  | 8.76  | 0.00 | 0.00 |
| ILMN_1733094 | STEAP1         | -0.85 | 10.03 | 0.00 | 0.00 |
| ILMN_3224926 | RBM47          | -0.86 | 7.47  | 0.00 | 0.00 |
| ILMN_1754660 | ZCCHC24        | -1.00 | 7.61  | 0.00 | 0.00 |
| ILMN_1672405 | TMED7          | -1.09 | 9.64  | 0.00 | 0.00 |
| ILMN_1774874 | IL1RN          | -0.95 | 8.91  | 0.00 | 0.00 |
| ILMN_1735584 | ST8SIA5        | -0.88 | 6.82  | 0.00 | 0.00 |
| ILMN_1675387 | LIMS1          | -0.88 | 8.92  | 0.00 | 0.00 |
| ILMN_1832208 |                | -0.92 | 8.57  | 0.00 | 0.00 |
| ILMN_1780898 | PRKCH          | -1.00 | 7.45  | 0.00 | 0.00 |
| ILMN_2380237 | C1QTNF1        | 1.12  | 9.67  | 0.00 | 0.00 |
| ILMN_1651832 | EHD1           | -0.85 | 10.50 | 0.00 | 0.00 |
| ILMN_1682717 | IER3           | -0.83 | 10.94 | 0.00 | 0.00 |
| ILMN_1813091 | ARL1           | -0.83 | 9.06  | 0.00 | 0.00 |
| ILMN_1716608 | NGF            | -0.85 | 6.32  | 0.00 | 0.00 |
| ILMN_1677446 | TMEM189-UBE2V1 | -0.86 | 7.34  | 0.00 | 0.00 |
| ILMN_1787657 | CLDN12         | -0.83 | 9.30  | 0.00 | 0.00 |
| ILMN_1796074 | C18orf56       | 0.82  | 8.90  | 0.00 | 0.00 |
| ILMN_1764362 | LYAR           | -0.81 | 8.62  | 0.00 | 0.00 |
| ILMN_1803995 | TM7SF3         | -0.91 | 8.85  | 0.00 | 0.00 |
| ILMN_1739428 | IFIT2          | 0.88  | 7.31  | 0.00 | 0.00 |
| ILMN_1792455 | TMEM158        | -0.84 | 13.54 | 0.00 | 0.00 |
| ILMN_1767685 | SERPINB7       | -1.15 | 8.65  | 0.00 | 0.00 |
| ILMN_1752046 | SH2B3          | -0.88 | 11.28 | 0.00 | 0.00 |
| ILMN_1705442 | CMTM3          | -0.85 | 10.40 | 0.00 | 0.00 |
| ILMN_2339202 | KTN1           | -0.83 | 10.90 | 0.00 | 0.00 |
| ILMN_1697597 | KIAA0494       | -0.82 | 9.19  | 0.00 | 0.00 |
| ILMN_1768480 | VGLL4          | -0.88 | 8.73  | 0.00 | 0.00 |
| ILMN_2221046 | GM2A           | -0.99 | 7.60  | 0.00 | 0.00 |
| ILMN_1793990 | ID2            | 0.95  | 8.96  | 0.00 | 0.00 |
| ILMN_1709094 | LIFR           | 0.86  | 6.62  | 0.00 | 0.00 |
| ILMN_1668863 | LYPD1          | 0.89  | 8.07  | 0.00 | 0.00 |
| ILMN_1652512 | C2CD2          | -0.84 | 10.06 | 0.00 | 0.00 |
| ILMN_1805007 | SEMA4F         | -0.83 | 8.65  | 0.00 | 0.00 |
| ILMN_1856480 |                | 1.03  | 7.77  | 0.00 | 0.00 |
| ILMN_2388701 | ST3GAL5        | 0.91  | 6.70  | 0.00 | 0.00 |
| ILMN_2054297 | PTGS2          | -1.01 | 7.66  | 0.00 | 0.00 |
| ILMN_1715401 | MT1G           | -1.12 | 9.72  | 0.00 | 0.00 |
| ILMN_2369018 | EVI2A          | 0.89  | 6.45  | 0.00 | 0.00 |
| ILMN_1804798 | BEXL1          | -0.81 | 9.16  | 0.00 | 0.00 |
| ILMN_1705629 | STEAP1         | -0.81 | 8.58  | 0.00 | 0.00 |
| ILMN_1708619 | SEH1L          | -0.82 | 7.50  | 0.00 | 0.00 |
| ILMN_1689456 | ZBTB20         | 0.81  | 7.59  | 0.00 | 0.00 |
| ILMN_1678805 | POMT2          | -0.79 | 7.31  | 0.00 | 0.00 |
| ILMN_1741985 | BBS10          | -0.82 | 6.39  | 0.00 | 0.00 |
| ILMN_2181968 | CBL            | -0.88 | 7.07  | 0.00 | 0.00 |

|              |           |       |       |      |      |
|--------------|-----------|-------|-------|------|------|
| ILMN_2077550 | RACGAP1   | -0.83 | 9.33  | 0.00 | 0.00 |
| ILMN_2149766 | APPBP2    | -0.87 | 8.67  | 0.00 | 0.00 |
| ILMN_1754489 | FBXL20    | -0.79 | 8.08  | 0.00 | 0.00 |
| ILMN_1733176 | LIMS1     | -0.79 | 10.79 | 0.00 | 0.00 |
| ILMN_2376133 | KIAA1191  | -0.85 | 8.98  | 0.00 | 0.00 |
| ILMN_1855278 |           | -0.87 | 7.31  | 0.00 | 0.00 |
| ILMN_1653871 | NAMPT     | -0.93 | 9.48  | 0.00 | 0.00 |
| ILMN_1751276 | BDNF      | -0.79 | 8.45  | 0.00 | 0.00 |
| ILMN_1691809 | PSMA1     | -0.77 | 9.33  | 0.00 | 0.00 |
| ILMN_1737398 | PTPLAD1   | -0.79 | 11.09 | 0.00 | 0.00 |
| ILMN_2052208 | GADD45A   | 0.78  | 9.67  | 0.00 | 0.00 |
| ILMN_1761281 | LOC441019 | -0.79 | 10.31 | 0.00 | 0.00 |
| ILMN_1776297 | GOLGA4    | 0.78  | 8.10  | 0.00 | 0.00 |
| ILMN_2383383 | PIR       | 0.78  | 8.64  | 0.00 | 0.00 |
| ILMN_1738552 | SLC1A3    | 0.87  | 9.14  | 0.00 | 0.00 |
| ILMN_1775829 | PERP      | -0.89 | 7.27  | 0.00 | 0.00 |
| ILMN_3251672 | DSG2      | -0.81 | 10.06 | 0.00 | 0.00 |
| ILMN_2347068 | MKMK2     | 0.76  | 10.74 | 0.00 | 0.00 |
| ILMN_1808059 | BCAS4     | -0.78 | 8.35  | 0.00 | 0.00 |
| ILMN_2413898 | MCM10     | -0.83 | 8.16  | 0.00 | 0.00 |
| ILMN_3243682 | C1orf93   | -0.82 | 6.94  | 0.00 | 0.00 |
| ILMN_1668507 | DDAH1     | -0.89 | 6.33  | 0.00 | 0.00 |
| ILMN_1714741 | LOC346887 | -0.82 | 9.77  | 0.00 | 0.00 |
| ILMN_1732296 | ID3       | 1.23  | 10.83 | 0.00 | 0.00 |
| ILMN_2344662 | HMGA2     | -0.77 | 8.74  | 0.00 | 0.00 |
| ILMN_1806787 | CSDC2     | 0.84  | 6.60  | 0.00 | 0.00 |
| ILMN_2355033 | KIAA1147  | 0.77  | 9.75  | 0.00 | 0.00 |
| ILMN_1793616 | RNF38     | 0.85  | 8.75  | 0.00 | 0.00 |
| ILMN_1678968 | GEM       | -0.87 | 7.14  | 0.00 | 0.00 |
| ILMN_1744381 | SERPINE1  | -1.10 | 10.53 | 0.00 | 0.00 |
| ILMN_2357134 | SPHK1     | -0.91 | 9.55  | 0.00 | 0.00 |
| ILMN_2395139 | SERPINB7  | -0.99 | 7.65  | 0.00 | 0.00 |
| ILMN_1709479 | YAP1      | -0.92 | 8.24  | 0.00 | 0.00 |
| ILMN_3248906 | ZC4H2     | -0.75 | 6.56  | 0.00 | 0.00 |
| ILMN_2373763 | CASP7     | -0.78 | 6.81  | 0.00 | 0.00 |
| ILMN_1813775 | GAK       | -0.75 | 9.80  | 0.00 | 0.00 |
| ILMN_1670895 | ZNF207    | -0.77 | 10.29 | 0.00 | 0.00 |
| ILMN_1757338 | PLSCR4    | 0.82  | 7.02  | 0.00 | 0.00 |
| ILMN_2296950 | APOBEC3F  | 0.78  | 7.45  | 0.00 | 0.00 |
| ILMN_1852022 | KIAA1881  | 0.78  | 5.95  | 0.00 | 0.00 |
| ILMN_1720373 | SLC7A5    | -0.98 | 7.74  | 0.00 | 0.00 |
| ILMN_1794875 | AGPAT9    | -0.92 | 9.12  | 0.00 | 0.00 |
| ILMN_3245143 | CCDC19    | -0.78 | 6.39  | 0.00 | 0.00 |
| ILMN_1788547 | GCLM      | -0.76 | 8.98  | 0.00 | 0.00 |
| ILMN_1658407 | SLC43A3   | -0.75 | 9.56  | 0.00 | 0.00 |
| ILMN_1747183 | GXYLT1    | 0.79  | 8.88  | 0.00 | 0.00 |
| ILMN_1798360 | CXCR7     | 0.87  | 6.20  | 0.00 | 0.00 |
| ILMN_2124585 | GREM1     | -0.99 | 6.20  | 0.00 | 0.00 |
| ILMN_1657435 | MT1M      | -0.95 | 7.53  | 0.00 | 0.00 |
| ILMN_1766169 | BCAT1     | -0.80 | 9.31  | 0.00 | 0.00 |
| ILMN_3256325 | CYB561D1  | 0.74  | 9.50  | 0.00 | 0.00 |
| ILMN_2338323 | CDC25B    | 0.78  | 10.20 | 0.00 | 0.00 |
| ILMN_1763433 | TRIM9     | -0.77 | 7.06  | 0.00 | 0.00 |
| ILMN_1788416 | FAM108C1  | -0.83 | 8.31  | 0.00 | 0.00 |
| ILMN_1675848 | MYL12A    | -0.79 | 12.11 | 0.00 | 0.00 |
| ILMN_2309534 | RDM1      | 0.87  | 8.76  | 0.00 | 0.00 |
| ILMN_1792671 | C12orf29  | -0.85 | 7.34  | 0.00 | 0.00 |
| ILMN_2330371 | TATDN3    | -0.85 | 8.25  | 0.00 | 0.00 |
| ILMN_1790317 | RAB26     | 0.76  | 6.27  | 0.00 | 0.00 |
| ILMN_1689800 | MRT04     | -0.79 | 8.53  | 0.00 | 0.00 |
| ILMN_2325506 | BCAS4     | -0.81 | 8.49  | 0.00 | 0.00 |
| ILMN_1738632 | PRKAR1A   | -0.76 | 11.09 | 0.00 | 0.00 |
| ILMN_3297455 | LOC729082 | 0.74  | 9.10  | 0.00 | 0.00 |
| ILMN_1767691 | VPS25     | -0.76 | 8.75  | 0.00 | 0.00 |
| ILMN_1915076 |           | 0.77  | 9.48  | 0.00 | 0.00 |
| ILMN_1669905 | DCP2      | 0.92  | 8.40  | 0.00 | 0.00 |
| ILMN_2112638 | SVEP1     | -0.73 | 6.84  | 0.00 | 0.00 |
| ILMN_3307944 | PHLDB3    | 0.97  | 6.08  | 0.00 | 0.00 |
| ILMN_1769245 | GLIPR1    | -0.74 | 9.35  | 0.00 | 0.00 |
| ILMN_1770085 | BTG2      | 0.77  | 6.48  | 0.00 | 0.00 |
| ILMN_1786050 | RBBP9     | -0.77 | 7.27  | 0.00 | 0.00 |
| ILMN_2290118 | MEGF9     | 0.76  | 6.80  | 0.00 | 0.00 |
| ILMN_1657111 | C14orf78  | 0.74  | 11.65 | 0.00 | 0.00 |
| ILMN_1771179 | CYB561    | -0.75 | 7.87  | 0.00 | 0.00 |
| ILMN_2340908 | SCML1     | 0.76  | 7.50  | 0.00 | 0.00 |
| ILMN_1740523 | KTN1      | -0.95 | 7.11  | 0.00 | 0.00 |
| ILMN_1810147 | ZNF524    | 0.76  | 7.90  | 0.00 | 0.00 |
| ILMN_1787509 | PRIC285   | 0.74  | 8.93  | 0.00 | 0.00 |
| ILMN_2267914 | CD68      | -1.16 | 8.65  | 0.00 | 0.01 |
| ILMN_1736585 | TMED10    | -0.83 | 8.66  | 0.00 | 0.01 |
| ILMN_1778177 | ZNF207    | -0.75 | 10.59 | 0.00 | 0.01 |
| ILMN_1800160 | NR0B1     | 0.74  | 9.47  | 0.00 | 0.01 |
| ILMN_1728445 | IGFBP1    | -0.92 | 6.31  | 0.00 | 0.01 |
| ILMN_2184373 | IL8       | -1.09 | 10.44 | 0.00 | 0.01 |
| ILMN_1730816 | GPR162    | 1.05  | 8.05  | 0.00 | 0.01 |
| ILMN_1691508 | PLAUR     | -0.75 | 9.54  | 0.00 | 0.01 |

|              |               |       |       |      |      |
|--------------|---------------|-------|-------|------|------|
| ILMN_1666156 | MORF4L2       | -0.74 | 11.42 | 0.00 | 0.01 |
| ILMN_1729288 | C1QTNF6       | 0.86  | 6.85  | 0.00 | 0.01 |
| ILMN_1674243 | TFRC          | -0.72 | 11.92 | 0.00 | 0.01 |
| ILMN_1803124 | BIRC5         | -0.74 | 6.63  | 0.00 | 0.01 |
| ILMN_3253471 | KLHL29        | -0.74 | 6.59  | 0.00 | 0.01 |
| ILMN_1721128 | TOMM34        | -0.74 | 12.08 | 0.00 | 0.01 |
| ILMN_3238058 | LOC151162     | -0.74 | 9.55  | 0.00 | 0.01 |
| ILMN_2311537 | HMGA1         | -0.74 | 10.28 | 0.00 | 0.01 |
| ILMN_2415911 | ENOX2         | -0.79 | 7.43  | 0.00 | 0.01 |
| ILMN_1756308 | NAE1          | -0.76 | 6.00  | 0.00 | 0.01 |
| ILMN_1680367 | C10orf90      | -0.77 | 9.68  | 0.00 | 0.01 |
| ILMN_2388070 | TMEM44        | -0.74 | 8.40  | 0.00 | 0.01 |
| ILMN_1735432 | ISCU          | 0.73  | 9.27  | 0.00 | 0.01 |
| ILMN_3307877 | C21orf58      | 0.80  | 10.04 | 0.00 | 0.01 |
| ILMN_1722811 | CDKN1B        | 0.71  | 8.41  | 0.00 | 0.01 |
| ILMN_1748124 | TSC22D3       | -0.75 | 7.27  | 0.00 | 0.01 |
| ILMN_1713124 | AKR1C3        | 1.01  | 10.59 | 0.00 | 0.01 |
| ILMN_1728923 | F2RL2         | -0.70 | 5.78  | 0.00 | 0.01 |
| ILMN_1713178 | FAM116A       | -0.72 | 7.63  | 0.00 | 0.01 |
| ILMN_1757872 | DKFZp761P0423 | 0.73  | 7.43  | 0.00 | 0.01 |
| ILMN_1725485 | RGS17         | -0.73 | 9.25  | 0.00 | 0.01 |
| ILMN_1837428 |               | -0.75 | 10.30 | 0.00 | 0.01 |
| ILMN_1711120 | ARC           | -0.70 | 6.73  | 0.00 | 0.01 |
| ILMN_1745887 | FBXO21        | 0.73  | 9.73  | 0.00 | 0.01 |
| ILMN_1680139 | MAFF          | -0.71 | 6.45  | 0.00 | 0.01 |
| ILMN_1714861 | CD68          | -0.77 | 12.08 | 0.00 | 0.01 |
| ILMN_1791912 | SIDT2         | 0.72  | 7.99  | 0.00 | 0.01 |
| ILMN_2289924 | TRAK1         | 0.72  | 8.26  | 0.00 | 0.01 |
| ILMN_1773337 | DKK1          | -0.84 | 7.73  | 0.00 | 0.01 |
| ILMN_2221564 | LYAR          | -0.79 | 8.79  | 0.00 | 0.01 |
| ILMN_1713807 | MAN1C1        | 0.84  | 9.10  | 0.00 | 0.01 |
| ILMN_1793263 | C1orf94       | -0.69 | 10.98 | 0.00 | 0.01 |
| ILMN_2096405 | WDR37         | -0.69 | 8.32  | 0.00 | 0.01 |
| ILMN_2049766 | NFE2L3        | -0.75 | 6.28  | 0.00 | 0.01 |
| ILMN_1699703 | ARCN1         | -0.80 | 9.64  | 0.00 | 0.01 |
| ILMN_1670638 | PITPNC1       | -0.74 | 8.45  | 0.00 | 0.01 |
| ILMN_1705032 | SEH1L         | -0.71 | 6.47  | 0.00 | 0.01 |
| ILMN_2412384 | CCNE2         | 0.84  | 8.80  | 0.00 | 0.01 |
| ILMN_1743219 | CA11          | 0.70  | 7.05  | 0.00 | 0.01 |
| ILMN_1704418 | FOXD1         | -0.69 | 9.98  | 0.00 | 0.01 |
| ILMN_1786021 | PRKAB2        | 0.71  | 7.39  | 0.00 | 0.01 |
| ILMN_1671703 | ACTA2         | 0.69  | 11.40 | 0.00 | 0.01 |
| ILMN_2186482 | TMED7         | -0.90 | 8.90  | 0.00 | 0.01 |
| ILMN_2372413 | BID           | -0.75 | 7.73  | 0.00 | 0.01 |
| ILMN_1738725 | LIF           | -0.78 | 6.37  | 0.00 | 0.01 |
| ILMN_1710514 | BCL3          | 0.68  | 8.84  | 0.00 | 0.01 |
| ILMN_2189371 | NTNG1         | -0.71 | 7.00  | 0.00 | 0.01 |
| ILMN_2384181 | DHRS9         | -0.70 | 6.45  | 0.00 | 0.01 |
| ILMN_1770228 | KRT34         | -0.74 | 6.20  | 0.00 | 0.01 |
| ILMN_1663257 | ATP6V1C1      | -0.79 | 6.37  | 0.00 | 0.01 |
| ILMN_3242105 | LOC100134073  | 0.82  | 8.01  | 0.00 | 0.01 |
| ILMN_1716766 | CEBPG         | -0.74 | 8.06  | 0.00 | 0.01 |
| ILMN_1709634 | CMBL          | 0.70  | 9.70  | 0.00 | 0.01 |
| ILMN_2174127 | DCBLD2        | -0.75 | 12.78 | 0.00 | 0.01 |
| ILMN_2044293 | KBTD7         | 0.73  | 7.22  | 0.00 | 0.01 |
| ILMN_1803686 | ADA           | 0.87  | 10.76 | 0.00 | 0.01 |
| ILMN_3301824 | TSEN15        | -0.79 | 7.56  | 0.00 | 0.01 |
| ILMN_1659027 | SLC2A1        | -0.81 | 9.37  | 0.00 | 0.01 |
| ILMN_1651950 | TPST1         | -0.68 | 8.68  | 0.00 | 0.01 |
| ILMN_3246060 | LOC654433     | -0.83 | 9.25  | 0.00 | 0.01 |
| ILMN_1704972 | TRIM5         | 0.72  | 8.78  | 0.00 | 0.01 |
| ILMN_2342033 | F11R          | -0.73 | 7.32  | 0.00 | 0.01 |
| ILMN_2399036 | SEPN1         | -0.78 | 8.48  | 0.00 | 0.01 |
| ILMN_2058070 | NEDD8         | -0.70 | 12.63 | 0.00 | 0.01 |
| ILMN_1706246 | CCT5          | -0.72 | 8.27  | 0.00 | 0.01 |
| ILMN_1748309 | LOC645367     | 0.73  | 7.24  | 0.00 | 0.01 |
| ILMN_1738554 | LOC647346     | -0.71 | 8.51  | 0.00 | 0.01 |
| ILMN_1801205 | GNPMB         | 0.74  | 11.91 | 0.00 | 0.01 |
| ILMN_1802615 | CDK6          | 0.83  | 8.68  | 0.00 | 0.01 |
| ILMN_2404625 | LAT           | -0.73 | 8.82  | 0.00 | 0.01 |
| ILMN_1716089 | KANK2         | 0.67  | 8.53  | 0.00 | 0.01 |
| ILMN_2370208 | CMTM3         | -0.76 | 7.98  | 0.00 | 0.01 |
| ILMN_1754716 | HAS1          | -0.72 | 6.39  | 0.00 | 0.01 |
| ILMN_1790533 | PHACTR2       | -0.75 | 7.12  | 0.00 | 0.01 |
| ILMN_1809931 | NDRG1         | -1.15 | 11.01 | 0.00 | 0.01 |
| ILMN_1698243 | C1orf85       | 0.68  | 11.09 | 0.00 | 0.01 |
| ILMN_1745992 | C8orf30A      | -0.67 | 5.74  | 0.00 | 0.01 |
| ILMN_1764629 | SLC39A14      | -0.68 | 9.24  | 0.00 | 0.01 |
| ILMN_1859657 |               | 0.67  | 6.44  | 0.00 | 0.01 |
| ILMN_1651347 | SERTAD2       | -0.68 | 10.50 | 0.00 | 0.01 |
| ILMN_1734486 | C1orf19       | -0.68 | 9.25  | 0.00 | 0.01 |
| ILMN_1773567 | LAMA5         | 1.05  | 8.48  | 0.00 | 0.01 |
| ILMN_1674402 | TMEM71        | -0.71 | 7.15  | 0.00 | 0.01 |
| ILMN_1807767 | KIAA0182      | 0.68  | 7.59  | 0.00 | 0.01 |
| ILMN_1783448 | DYNC1LI2      | -0.69 | 10.65 | 0.00 | 0.01 |
| ILMN_2139100 | SHISA5        | -0.67 | 10.61 | 0.00 | 0.01 |

|              |          |       |       |      |      |
|--------------|----------|-------|-------|------|------|
| ILMN_2374352 | DBNDD1   | 0.70  | 8.01  | 0.00 | 0.01 |
| ILMN_1704196 | DSG2     | -0.67 | 7.35  | 0.00 | 0.01 |
| ILMN_2094061 | IMPA2    | 0.67  | 10.36 | 0.00 | 0.01 |
| ILMN_1684694 | ANK1     | 0.70  | 6.55  | 0.00 | 0.01 |
| ILMN_1713751 | ADAM19   | 0.75  | 9.51  | 0.00 | 0.01 |
| ILMN_1709725 | FLJ16165 | -0.67 | 6.59  | 0.00 | 0.01 |
| ILMN_1691946 | FAM173B  | -0.71 | 7.39  | 0.00 | 0.01 |
| ILMN_1805535 | VRK3     | -0.69 | 7.27  | 0.00 | 0.01 |
| ILMN_1652434 | MTHFD2L  | -0.68 | 7.90  | 0.00 | 0.01 |
| ILMN_1683065 | C2orf64  | -0.70 | 8.83  | 0.00 | 0.01 |
| ILMN_1796962 | PPP3R1   | -0.76 | 9.37  | 0.00 | 0.01 |
| ILMN_1882590 |          | -0.76 | 7.05  | 0.00 | 0.01 |
| ILMN_1795937 | VIL2     | -0.69 | 10.30 | 0.00 | 0.01 |
| ILMN_1678678 | SLC37A4  | 0.70  | 8.64  | 0.00 | 0.01 |
| ILMN_1698019 | LGMN     | 0.66  | 8.52  | 0.00 | 0.01 |
| ILMN_1745282 | RAGE     | -0.85 | 9.12  | 0.00 | 0.01 |
| ILMN_1742461 | UAP1     | -0.67 | 8.51  | 0.00 | 0.01 |
| ILMN_1735552 | KIF1B    | 0.67  | 9.10  | 0.00 | 0.01 |
| ILMN_2068104 | TFPI2    | -0.93 | 9.31  | 0.00 | 0.01 |
| ILMN_1684771 | PGRMC1   | -0.67 | 11.59 | 0.00 | 0.01 |
| ILMN_2161357 | C6orf111 | 0.65  | 8.67  | 0.00 | 0.01 |
| ILMN_1735499 | DCBLD2   | -0.77 | 12.02 | 0.00 | 0.01 |
| ILMN_1759097 | MLLT11   | -0.70 | 11.20 | 0.00 | 0.01 |
| ILMN_2122103 | ETS1     | 0.76  | 8.26  | 0.00 | 0.01 |
| ILMN_1756541 | MXD4     | 0.67  | 9.11  | 0.00 | 0.01 |
| ILMN_1708502 | AFF4     | -0.77 | 8.54  | 0.00 | 0.01 |
| ILMN_1712707 | ABHD8    | 0.66  | 9.12  | 0.00 | 0.01 |
| ILMN_1676600 | SEC24C   | -0.69 | 10.45 | 0.00 | 0.01 |
| ILMN_1749432 | MRPL32   | -0.66 | 9.90  | 0.00 | 0.01 |
| ILMN_1790136 | C20orf20 | -0.68 | 10.64 | 0.00 | 0.01 |
| ILMN_1653115 | ECH1     | 0.67  | 10.45 | 0.00 | 0.01 |
| ILMN_1690282 | CRADD    | -0.68 | 6.97  | 0.00 | 0.01 |
| ILMN_1770905 | SHC3     | -0.67 | 7.17  | 0.00 | 0.01 |
| ILMN_1769520 | UBE2L6   | -0.74 | 11.82 | 0.00 | 0.01 |
| ILMN_2098616 | C5orf39  | 0.68  | 8.10  | 0.00 | 0.01 |
| ILMN_1677200 | CYFIP2   | 0.76  | 9.37  | 0.00 | 0.01 |
| ILMN_1756417 | ANKRD37  | -0.67 | 7.41  | 0.00 | 0.01 |
| ILMN_1659936 | PPP1R15A | -0.65 | 10.36 | 0.00 | 0.01 |
| ILMN_1784553 | SDC2     | -0.79 | 6.27  | 0.00 | 0.01 |
| ILMN_1792837 | GIAO1    | -0.66 | 7.64  | 0.00 | 0.01 |
| ILMN_1743103 | SH3PXD2A | 0.66  | 8.50  | 0.00 | 0.01 |
| ILMN_1811363 | NOVA1    | 0.70  | 7.28  | 0.00 | 0.01 |
| ILMN_1736814 | CLNS1A   | -0.66 | 9.47  | 0.00 | 0.01 |
| ILMN_1803559 | FLJ39632 | 0.65  | 7.64  | 0.00 | 0.01 |
| ILMN_1728742 | C5orf4   | 0.67  | 6.26  | 0.00 | 0.01 |
| ILMN_1758323 | ACPP     | -0.72 | 7.23  | 0.00 | 0.01 |
| ILMN_1663399 | TIMP4    | 0.65  | 9.57  | 0.00 | 0.01 |
| ILMN_1718633 | LRP5L    | 0.66  | 6.61  | 0.00 | 0.01 |
| ILMN_2065299 | EDEM3    | -0.73 | 7.02  | 0.00 | 0.01 |
| ILMN_1738816 | FOXO1    | 0.65  | 7.00  | 0.00 | 0.01 |
| ILMN_1671777 | FGF13    | -0.77 | 7.29  | 0.00 | 0.01 |
| ILMN_1864166 |          | -0.66 | 7.15  | 0.00 | 0.01 |
| ILMN_1671142 | GPR68    | -0.69 | 7.20  | 0.00 | 0.01 |
| ILMN_1691539 | LAT      | -0.65 | 7.93  | 0.00 | 0.01 |
| ILMN_1757467 | H1FO     | 0.66  | 8.61  | 0.00 | 0.01 |
| ILMN_1717094 | ZNF618   | 0.68  | 7.11  | 0.00 | 0.01 |
| ILMN_1798458 | KIAA1026 | 0.65  | 7.95  | 0.00 | 0.01 |
| ILMN_1812297 | CYP26B1  | -0.72 | 6.79  | 0.00 | 0.01 |
| ILMN_1893555 |          | -0.72 | 7.73  | 0.00 | 0.01 |
| ILMN_2266948 | SLC38A1  | -0.67 | 7.14  | 0.00 | 0.01 |
| ILMN_1786766 | SNTB2    | -0.71 | 7.51  | 0.00 | 0.01 |
| ILMN_1715555 | DBP      | 0.77  | 6.68  | 0.00 | 0.01 |
| ILMN_1720623 | SYTL3    | -0.63 | 6.69  | 0.00 | 0.01 |
| ILMN_1758213 | GPAM     | -0.68 | 7.31  | 0.00 | 0.01 |
| ILMN_1725346 | SNAPC1   | -0.81 | 7.32  | 0.00 | 0.01 |
| ILMN_1658835 | CAV2     | -0.65 | 7.47  | 0.00 | 0.01 |
| ILMN_2166686 | NUFIP1   | -0.68 | 6.37  | 0.00 | 0.01 |
| ILMN_1813704 | KIAA1199 | 0.94  | 7.51  | 0.00 | 0.01 |
| ILMN_1813625 | TRIM25   | 0.65  | 8.60  | 0.00 | 0.01 |
| ILMN_1754795 | FAT1     | 0.63  | 7.51  | 0.00 | 0.02 |
| ILMN_1701613 | RARRES3  | 1.01  | 7.58  | 0.00 | 0.02 |
| ILMN_1763386 | BID      | -0.70 | 8.93  | 0.00 | 0.02 |
| ILMN_1730809 | SLC29A2  | 0.73  | 6.96  | 0.00 | 0.02 |
| ILMN_1705114 | NUMB     | -0.65 | 9.27  | 0.00 | 0.02 |
| ILMN_1702140 | RACGAP1  | -0.70 | 6.97  | 0.00 | 0.02 |
| ILMN_1796497 | PIP3-E   | -0.65 | 6.60  | 0.00 | 0.02 |
| ILMN_1719286 | CTSA     | 0.72  | 11.66 | 0.00 | 0.02 |
| ILMN_1798061 | ZFYVE26  | 0.63  | 9.10  | 0.00 | 0.02 |
| ILMN_1715384 | B3GNT6   | -0.65 | 8.75  | 0.00 | 0.02 |
| ILMN_1668865 | SLC2A14  | -0.64 | 6.29  | 0.00 | 0.02 |
| ILMN_1689828 | DMPK     | 0.68  | 6.78  | 0.00 | 0.02 |
| ILMN_1683148 | PRICKLE2 | -0.64 | 8.82  | 0.00 | 0.02 |
| ILMN_2402629 | METTL9   | -0.89 | 6.40  | 0.00 | 0.02 |
| ILMN_1769264 | MCCC2    | -0.75 | 6.26  | 0.00 | 0.02 |
| ILMN_1740772 | APBB3    | 0.66  | 9.77  | 0.00 | 0.02 |
| ILMN_1738589 | MGLL     | -0.66 | 8.15  | 0.00 | 0.02 |

|              |              |       |       |      |      |
|--------------|--------------|-------|-------|------|------|
| ILMN_1760890 | SEPN1        | -0.91 | 9.12  | 0.00 | 0.02 |
| ILMN_1792660 | CAMSAP1L1    | -0.65 | 8.17  | 0.00 | 0.02 |
| ILMN_1724658 | BNIP3        | -0.89 | 11.94 | 0.00 | 0.02 |
| ILMN_1760303 | PIK3R1       | 0.69  | 7.63  | 0.00 | 0.02 |
| ILMN_1677292 | C5orf30      | -0.63 | 6.88  | 0.00 | 0.02 |
| ILMN_2380243 | SMAGP        | -0.68 | 8.02  | 0.00 | 0.02 |
| ILMN_1739335 | LOC400948    | -0.75 | 11.68 | 0.00 | 0.02 |
| ILMN_1756312 | SEMA7A       | -0.63 | 6.59  | 0.00 | 0.02 |
| ILMN_1753135 | ALK          | 0.72  | 6.22  | 0.00 | 0.02 |
| ILMN_2348403 | VRK3         | -0.62 | 7.04  | 0.00 | 0.02 |
| ILMN_1721344 | MOBKL2A      | -0.71 | 7.72  | 0.00 | 0.02 |
| ILMN_3251550 | PHLDA1       | -0.79 | 8.05  | 0.00 | 0.02 |
| ILMN_2369603 | CPEB1        | -0.66 | 8.59  | 0.00 | 0.02 |
| ILMN_1791147 | YPEL3        | 0.62  | 7.64  | 0.00 | 0.02 |
| ILMN_1785424 | ABLM1        | 0.62  | 6.46  | 0.00 | 0.02 |
| ILMN_1783840 | FLJ42986     | -0.81 | 6.14  | 0.00 | 0.02 |
| ILMN_1750079 | PURB         | -0.66 | 9.05  | 0.00 | 0.02 |
| ILMN_2231911 | AUH          | 0.68  | 7.85  | 0.00 | 0.02 |
| ILMN_2153495 | WNT7B        | -0.65 | 8.09  | 0.00 | 0.02 |
| ILMN_1718718 | MKKS         | -0.63 | 8.12  | 0.00 | 0.02 |
| ILMN_3251132 | TMOD2        | -0.62 | 6.24  | 0.00 | 0.02 |
| ILMN_1738342 | METT5D1      | -0.62 | 7.64  | 0.00 | 0.02 |
| ILMN_1845086 |              | 0.71  | 7.00  | 0.00 | 0.02 |
| ILMN_2151579 | HMGN1        | -0.62 | 12.21 | 0.00 | 0.02 |
| ILMN_1807515 | CSTF2T       | -0.65 | 6.93  | 0.00 | 0.02 |
| ILMN_1767658 | RRS1         | -0.63 | 9.08  | 0.00 | 0.02 |
| ILMN_1672728 | KCTD5        | -0.61 | 9.35  | 0.00 | 0.02 |
| ILMN_1809417 | LRFN4        | 0.61  | 8.14  | 0.00 | 0.02 |
| ILMN_3238326 | RNF144A      | -0.61 | 7.87  | 0.00 | 0.02 |
| ILMN_1789991 | MARCH4       | -1.03 | 7.67  | 0.00 | 0.02 |
| ILMN_1754864 | SLC25A18     | 0.76  | 7.04  | 0.00 | 0.02 |
| ILMN_1708778 | ASS1         | 0.63  | 8.57  | 0.00 | 0.02 |
| ILMN_2276933 | GDAP1        | -0.67 | 6.32  | 0.00 | 0.02 |
| ILMN_1765401 | RRN3         | -0.61 | 8.26  | 0.00 | 0.02 |
| ILMN_2367428 | FAM96A       | -0.65 | 9.93  | 0.00 | 0.02 |
| ILMN_1761247 | PIR          | 0.61  | 9.42  | 0.00 | 0.02 |
| ILMN_1680129 | NSUN2        | -0.60 | 10.73 | 0.00 | 0.02 |
| ILMN_1748283 | PIM2         | 0.63  | 7.69  | 0.00 | 0.02 |
| ILMN_1729832 | LOC653994    | -0.61 | 7.24  | 0.00 | 0.02 |
| ILMN_1808354 | SLC4A7       | -0.68 | 6.91  | 0.00 | 0.02 |
| ILMN_3240222 | PRAGMIN      | 0.62  | 8.11  | 0.00 | 0.02 |
| ILMN_1755303 | ZNF217       | 0.61  | 9.06  | 0.00 | 0.02 |
| ILMN_2228044 | TBC1D23      | -0.62 | 8.17  | 0.00 | 0.02 |
| ILMN_1803691 | ARTN         | 0.62  | 6.45  | 0.00 | 0.02 |
| ILMN_2351029 | MTMR2        | -0.62 | 6.32  | 0.00 | 0.02 |
| ILMN_1699489 | TUBB6        | -0.60 | 11.18 | 0.00 | 0.02 |
| ILMN_1733864 | SLC35F4      | -0.61 | 6.23  | 0.00 | 0.02 |
| ILMN_1716687 | TPM1         | -0.64 | 10.94 | 0.00 | 0.02 |
| ILMN_3306730 | RBM47        | -0.61 | 7.10  | 0.00 | 0.02 |
| ILMN_1708151 | LAGE3        | 0.61  | 11.03 | 0.00 | 0.02 |
| ILMN_2115125 | CTGF         | -0.62 | 7.41  | 0.00 | 0.02 |
| ILMN_2217630 | CDKL3        | -0.64 | 6.63  | 0.00 | 0.02 |
| ILMN_1675266 | NAGPA        | 0.60  | 7.82  | 0.00 | 0.02 |
| ILMN_1747227 | ADORA1       | 0.61  | 8.65  | 0.00 | 0.02 |
| ILMN_2188862 | GDF15        | 0.91  | 9.33  | 0.00 | 0.02 |
| ILMN_1793203 | SMCR7L       | -0.61 | 8.09  | 0.00 | 0.02 |
| ILMN_3294741 | LOC644496    | -0.60 | 6.77  | 0.00 | 0.02 |
| ILMN_1708414 | GNL3L        | -0.63 | 9.07  | 0.00 | 0.02 |
| ILMN_1717180 | MTMR6        | -0.63 | 7.11  | 0.00 | 0.02 |
| ILMN_1748481 | TMEM199      | -0.67 | 8.27  | 0.00 | 0.02 |
| ILMN_1690352 | ADO          | -0.71 | 8.93  | 0.00 | 0.02 |
| ILMN_1904023 |              | 0.61  | 5.69  | 0.00 | 0.02 |
| ILMN_1730906 | FILIP1L      | -0.65 | 6.00  | 0.00 | 0.02 |
| ILMN_2413158 | PODXL        | -0.61 | 7.46  | 0.00 | 0.02 |
| ILMN_1666733 | IL8          | -1.19 | 9.15  | 0.00 | 0.02 |
| ILMN_1759513 | RND3         | -0.73 | 11.96 | 0.00 | 0.02 |
| ILMN_3271179 | LOC100128775 | -0.62 | 6.67  | 0.00 | 0.02 |
| ILMN_1755620 | IER5L        | 0.60  | 7.49  | 0.00 | 0.02 |
| ILMN_1768110 | ZAK          | -0.69 | 11.53 | 0.00 | 0.02 |
| ILMN_1815086 | NINJ1        | 0.61  | 10.09 | 0.00 | 0.02 |
| ILMN_1702636 | TUBB6        | -0.62 | 10.96 | 0.00 | 0.02 |
| ILMN_1698803 | ZAK          | -0.61 | 9.72  | 0.00 | 0.02 |
| ILMN_2057573 | FAM62B       | -0.60 | 11.00 | 0.00 | 0.02 |
| ILMN_1766797 | CCS          | 0.60  | 8.49  | 0.00 | 0.02 |
| ILMN_1803743 | LOC196752    | 0.62  | 7.28  | 0.00 | 0.02 |
| ILMN_3247452 | LOC100128731 | -0.69 | 12.16 | 0.00 | 0.02 |
| ILMN_3246538 | LOC100133866 | -0.77 | 8.69  | 0.00 | 0.02 |
| ILMN_1677511 | PTGS2        | -0.65 | 6.44  | 0.00 | 0.02 |
| ILMN_2364110 | GBA          | 0.60  | 10.34 | 0.00 | 0.02 |
| ILMN_1692272 | TEX261       | -0.62 | 8.09  | 0.00 | 0.02 |
| ILMN_2273882 | RNF38        | 0.68  | 5.74  | 0.00 | 0.02 |
| ILMN_3251415 | RBM43        | 0.59  | 7.60  | 0.00 | 0.02 |
| ILMN_3242459 | DCTPP1       | -0.60 | 11.34 | 0.00 | 0.02 |
| ILMN_1758034 | ETFDH        | 0.61  | 8.22  | 0.00 | 0.02 |
| ILMN_2186061 | PFKFB3       | -0.64 | 10.03 | 0.00 | 0.02 |
| ILMN_1757387 | UCHL1        | -0.60 | 12.02 | 0.00 | 0.02 |

|              |              |       |       |      |      |
|--------------|--------------|-------|-------|------|------|
| ILMN_1673275 | TRAPPC2      | 0.63  | 8.51  | 0.00 | 0.02 |
| ILMN_1732468 | HSPA4L       | 0.61  | 6.93  | 0.00 | 0.02 |
| ILMN_1784602 | CDKN1A       | 0.76  | 12.63 | 0.00 | 0.02 |
| ILMN_1716446 | BCL10        | -0.58 | 6.27  | 0.00 | 0.02 |
| ILMN_1694075 | GADD45A      | 0.63  | 8.79  | 0.00 | 0.02 |
| ILMN_1751656 | KLF11        | -0.70 | 7.56  | 0.00 | 0.02 |
| ILMN_1702198 | LOC643790    | -0.59 | 7.33  | 0.00 | 0.02 |
| ILMN_3255029 | LOC100130887 | -0.60 | 6.45  | 0.00 | 0.02 |
| ILMN_1761941 | C4orf18      | 0.61  | 6.04  | 0.00 | 0.02 |
| ILMN_2267365 | C11orf17     | -0.58 | 5.89  | 0.00 | 0.02 |
| ILMN_2102960 | KIAA1370     | 0.65  | 7.05  | 0.00 | 0.02 |
| ILMN_2151281 | GABARAPL1    | 0.59  | 8.52  | 0.00 | 0.02 |
| ILMN_1798123 | ELOVL1       | -0.64 | 8.31  | 0.00 | 0.02 |
| ILMN_3272378 | EZR          | -0.61 | 10.96 | 0.00 | 0.03 |
| ILMN_1679322 | SH2D4A       | -0.58 | 7.95  | 0.00 | 0.03 |
| ILMN_1723962 | LXN          | 0.67  | 9.02  | 0.00 | 0.03 |
| ILMN_1736568 | CASP2        | -0.59 | 7.71  | 0.00 | 0.03 |
| ILMN_1652445 | RAC1         | -0.60 | 6.64  | 0.00 | 0.03 |
| ILMN_1709032 | FYCO1        | -0.77 | 8.29  | 0.00 | 0.03 |
| ILMN_1655913 | NUCB2        | 0.61  | 9.01  | 0.00 | 0.03 |
| ILMN_1692511 | TMEM106C     | 0.61  | 10.61 | 0.00 | 0.03 |
| ILMN_1906110 |              | -0.59 | 7.10  | 0.00 | 0.03 |
| ILMN_1805063 | GSG1         | -0.60 | 5.85  | 0.00 | 0.03 |
| ILMN_1656628 | WDR4         | -0.61 | 9.13  | 0.00 | 0.03 |
| ILMN_1726913 | RBPJ         | -0.58 | 5.61  | 0.00 | 0.03 |
| ILMN_1800575 | LOC649260    | -0.58 | 6.80  | 0.00 | 0.03 |
| ILMN_1678655 | PNLIPRP3     | -0.68 | 9.03  | 0.00 | 0.03 |
| ILMN_1768127 | EBNA1BP2     | -0.58 | 11.60 | 0.00 | 0.03 |
| ILMN_1684045 | CDCA4        | 0.61  | 9.39  | 0.00 | 0.03 |
| ILMN_3243899 | C8orf83      | -0.63 | 6.63  | 0.00 | 0.03 |
| ILMN_1785618 | SMTN         | -0.65 | 7.66  | 0.00 | 0.03 |
| ILMN_1727001 | DDX46        | -0.60 | 8.23  | 0.00 | 0.03 |
| ILMN_3228585 | LOC728661    | 0.58  | 9.04  | 0.00 | 0.03 |
| ILMN_1850238 |              | 0.59  | 6.72  | 0.00 | 0.03 |
| ILMN_1742031 | IFRD2        | -0.57 | 7.89  | 0.00 | 0.03 |
| ILMN_1658290 | C16orf68     | -0.59 | 8.23  | 0.00 | 0.03 |
| ILMN_1683215 | ZBED3        | 0.74  | 6.89  | 0.00 | 0.03 |
| ILMN_1708660 | RWDD4A       | -0.59 | 8.24  | 0.00 | 0.03 |
| ILMN_1900661 |              | 0.68  | 8.54  | 0.00 | 0.03 |
| ILMN_2343048 | ABCB9        | 0.60  | 9.22  | 0.00 | 0.03 |
| ILMN_2354478 | CYFIP2       | 0.60  | 6.81  | 0.00 | 0.03 |
| ILMN_2331266 | NUMB         | -0.59 | 10.85 | 0.00 | 0.03 |
| ILMN_1721770 | PAPPA        | -0.58 | 9.65  | 0.00 | 0.03 |
| ILMN_1758067 | RGS4         | -0.64 | 7.04  | 0.00 | 0.03 |
| ILMN_2308849 | MYADM        | -0.93 | 10.01 | 0.00 | 0.03 |
| ILMN_2320906 | RTN3         | -0.59 | 8.34  | 0.00 | 0.03 |
| ILMN_1850711 |              | 0.58  | 5.61  | 0.00 | 0.03 |
| ILMN_2409318 | RCCD1        | -0.58 | 6.17  | 0.00 | 0.03 |
| ILMN_1797341 | ARID1A       | 0.59  | 9.58  | 0.00 | 0.03 |
| ILMN_1784985 | PRRT3        | 0.66  | 8.23  | 0.00 | 0.03 |
| ILMN_1723158 | NOP2         | -0.59 | 10.19 | 0.00 | 0.03 |
| ILMN_1701403 | HIP1         | -0.57 | 6.55  | 0.00 | 0.03 |
| ILMN_1812995 | CTSL1        | -0.60 | 13.27 | 0.00 | 0.03 |
| ILMN_3249501 | ZNF697       | -0.57 | 7.09  | 0.00 | 0.03 |
| ILMN_1730303 | KBTD7        | 0.66  | 6.20  | 0.00 | 0.03 |
| ILMN_3243506 | LOC100132826 | -0.60 | 5.65  | 0.00 | 0.03 |
| ILMN_2404665 | TRIM5        | 0.66  | 8.27  | 0.00 | 0.03 |
| ILMN_1676899 | YEATS2       | -0.57 | 8.32  | 0.00 | 0.03 |
| ILMN_2104106 | XPR1         | 0.58  | 9.48  | 0.00 | 0.03 |
| ILMN_2075818 | ZNF598       | -0.57 | 8.56  | 0.00 | 0.03 |
| ILMN_3274271 | LOC401537    | -0.79 | 6.28  | 0.00 | 0.03 |
| ILMN_1695880 | LOX          | -0.60 | 9.19  | 0.00 | 0.03 |
| ILMN_1790807 | XPC          | 0.58  | 9.43  | 0.00 | 0.03 |
| ILMN_1789732 | TMEM189      | -0.69 | 6.54  | 0.00 | 0.03 |
| ILMN_2325337 | APOL2        | 0.57  | 6.75  | 0.00 | 0.03 |
| ILMN_1658861 | FAM86B1      | -0.59 | 6.85  | 0.00 | 0.03 |
| ILMN_1655796 | MARCH3       | -0.60 | 7.61  | 0.00 | 0.03 |
| ILMN_3244963 | WDR42A       | 0.63  | 9.31  | 0.00 | 0.03 |
| ILMN_1871457 |              | 0.67  | 7.95  | 0.00 | 0.03 |
| ILMN_1788059 | PCGF5        | -0.59 | 6.09  | 0.00 | 0.03 |
| ILMN_2413899 | MCM10        | -0.58 | 6.66  | 0.00 | 0.03 |
| ILMN_2361643 | RRAGB        | 0.61  | 7.41  | 0.00 | 0.03 |
| ILMN_1669881 | TSPAN13      | -0.66 | 8.87  | 0.00 | 0.03 |
| ILMN_1784532 | COL22A1      | 0.58  | 5.37  | 0.00 | 0.03 |
| ILMN_1685314 | WNT7B        | -0.57 | 6.38  | 0.00 | 0.03 |
| ILMN_3247223 | TPBG         | -0.58 | 7.08  | 0.00 | 0.03 |
| ILMN_1723171 | LOC121006    | 0.67  | 5.60  | 0.00 | 0.03 |
| ILMN_1761801 | LOC147804    | -0.57 | 6.64  | 0.00 | 0.03 |
| ILMN_1801516 | GPC1         | 0.56  | 6.87  | 0.00 | 0.03 |
| ILMN_1746883 | SAT2         | 0.57  | 10.49 | 0.00 | 0.03 |
| ILMN_2089616 | FBXO10       | 0.66  | 6.39  | 0.00 | 0.03 |
| ILMN_1742534 | COL4A5       | 0.62  | 7.75  | 0.00 | 0.03 |
| ILMN_1656386 | SEC24D       | -0.57 | 7.58  | 0.00 | 0.03 |
| ILMN_1697735 | EWSR1        | -0.62 | 9.85  | 0.00 | 0.03 |
| ILMN_1857017 |              | 0.57  | 10.09 | 0.00 | 0.03 |
| ILMN_1781479 | SUV39H1      | -0.58 | 9.40  | 0.00 | 0.03 |

|              |              |       |       |      |      |
|--------------|--------------|-------|-------|------|------|
| ILMN_1752502 | HKDC1        | -0.73 | 7.19  | 0.00 | 0.03 |
| ILMN_1676278 | ABCC2        | 0.59  | 9.20  | 0.00 | 0.03 |
| ILMN_1791097 | RSBN1        | 0.59  | 7.59  | 0.00 | 0.03 |
| ILMN_3246722 | LOC100134259 | -0.57 | 6.49  | 0.00 | 0.03 |
| ILMN_1779171 | SGSM2        | 0.57  | 10.36 | 0.00 | 0.03 |
| ILMN_3221721 | LOC728802    | -0.66 | 6.26  | 0.00 | 0.03 |
| ILMN_1797530 | CHCHD5       | -0.60 | 8.96  | 0.00 | 0.03 |
| ILMN_1707652 | KRTAP1-5     | -0.59 | 6.08  | 0.00 | 0.03 |
| ILMN_2378376 | CYB561       | -0.57 | 7.57  | 0.00 | 0.03 |
| ILMN_1801616 | EMP1         | -0.64 | 11.92 | 0.00 | 0.03 |
| ILMN_2323526 | WAC          | -0.58 | 9.00  | 0.00 | 0.03 |
| ILMN_1752728 | FUCA1        | 0.60  | 8.27  | 0.00 | 0.03 |
| ILMN_1742782 | BAT4         | -0.61 | 6.73  | 0.00 | 0.03 |
| ILMN_1707975 | SERPIND1     | -0.68 | 6.01  | 0.00 | 0.03 |
| ILMN_1657701 | TMEM137      | 0.65  | 7.93  | 0.00 | 0.03 |
| ILMN_1695290 | FERMT2       | -0.57 | 9.34  | 0.00 | 0.03 |
| ILMN_1710303 | TTC25        | -0.56 | 7.38  | 0.00 | 0.03 |
| ILMN_2184612 | C3orf52      | -0.58 | 6.52  | 0.00 | 0.03 |
| ILMN_1784459 | MMP3         | -0.92 | 11.92 | 0.00 | 0.03 |
| ILMN_1785711 | NEDD8        | -0.56 | 8.55  | 0.00 | 0.03 |
| ILMN_1737413 | MSH2         | -0.57 | 6.70  | 0.00 | 0.03 |
| ILMN_1737988 | PRNP         | -0.57 | 11.43 | 0.00 | 0.03 |
| ILMN_2297626 | PEG10        | 0.57  | 8.23  | 0.00 | 0.03 |
| ILMN_1758105 | ZNF791       | 0.58  | 7.88  | 0.00 | 0.03 |
| ILMN_1686920 | CCDC58       | -0.61 | 8.70  | 0.00 | 0.03 |
| ILMN_2204940 | KRT79        | -0.66 | 6.03  | 0.00 | 0.03 |
| ILMN_1790562 | EYA3         | 0.64  | 7.80  | 0.00 | 0.03 |
| ILMN_1803811 | TRIB1        | -0.58 | 8.31  | 0.00 | 0.03 |
| ILMN_1829845 |              | 0.65  | 9.28  | 0.00 | 0.04 |
| ILMN_1737418 | ACSL6        | 0.56  | 5.88  | 0.00 | 0.04 |
| ILMN_1768391 | ARL4C        | -0.64 | 7.59  | 0.00 | 0.04 |
| ILMN_3180557 | CYB561D1     | 0.57  | 7.46  | 0.00 | 0.04 |
| ILMN_3236080 | FAM26E       | -0.56 | 6.10  | 0.00 | 0.04 |
| ILMN_1706687 | KLHL5        | -0.56 | 10.04 | 0.00 | 0.04 |
| ILMN_1808325 | TM4SF19      | -0.55 | 8.23  | 0.00 | 0.04 |
| ILMN_1685580 | CBLB         | 0.58  | 9.26  | 0.00 | 0.04 |
| ILMN_1699829 | CTGF         | -0.71 | 8.22  | 0.00 | 0.04 |
| ILMN_1719039 | UBE2G1       | -0.59 | 8.13  | 0.00 | 0.04 |
| ILMN_1752351 | LAMP2        | -0.65 | 10.64 | 0.00 | 0.04 |
| ILMN_1813399 | ATP2B1       | -0.61 | 6.17  | 0.00 | 0.04 |
| ILMN_1737283 | MGC39900     | 0.55  | 8.46  | 0.00 | 0.04 |
| ILMN_1846026 |              | -0.55 | 5.82  | 0.00 | 0.04 |
| ILMN_1729453 | TSPAN9       | 0.60  | 9.05  | 0.00 | 0.04 |
| ILMN_3256471 | FAM87A       | -0.56 | 7.84  | 0.00 | 0.04 |
| ILMN_1811264 | C15orf57     | -0.58 | 9.54  | 0.00 | 0.04 |
| ILMN_1714170 | SPSB1        | -0.60 | 8.05  | 0.00 | 0.04 |
| ILMN_1767113 | AOX1         | -0.67 | 7.83  | 0.00 | 0.04 |
| ILMN_2327994 | AZIN1        | -0.62 | 6.95  | 0.00 | 0.04 |
| ILMN_1664978 | TJP2         | -0.56 | 7.96  | 0.00 | 0.04 |
| ILMN_1694757 | CTSL1        | -0.55 | 9.36  | 0.00 | 0.04 |
| ILMN_3204933 | LOC401805    | -0.57 | 6.75  | 0.00 | 0.04 |
| ILMN_1747162 | DDX47        | -0.55 | 9.42  | 0.00 | 0.04 |
| ILMN_1718046 | ARNT2        | -0.56 | 6.64  | 0.00 | 0.04 |
| ILMN_2398711 | SIRT2        | 0.55  | 6.89  | 0.00 | 0.04 |
| ILMN_3237270 | LOC100133609 | -0.55 | 7.18  | 0.00 | 0.04 |
| ILMN_1799569 | LOC440895    | -0.58 | 6.73  | 0.00 | 0.04 |
| ILMN_1797822 | SEL1L3       | -0.68 | 9.17  | 0.00 | 0.04 |
| ILMN_3299558 | SFRS18       | 0.55  | 8.69  | 0.00 | 0.04 |
| ILMN_3239343 | STAG3L3      | 0.59  | 8.64  | 0.00 | 0.04 |
| ILMN_1719599 | SYTL4        | -0.57 | 7.17  | 0.00 | 0.04 |
| ILMN_2413259 | SOCS4        | -0.60 | 8.27  | 0.00 | 0.04 |
| ILMN_1761762 | C6orf141     | -0.60 | 8.18  | 0.00 | 0.04 |
| ILMN_1673282 | LAMP2        | 0.56  | 10.48 | 0.00 | 0.04 |
| ILMN_2337263 | PKIB         | -0.74 | 6.70  | 0.00 | 0.04 |
| ILMN_1707464 | MST1         | 0.59  | 6.87  | 0.00 | 0.04 |
| ILMN_1652826 | LRRC17       | 0.63  | 7.49  | 0.00 | 0.04 |
| ILMN_2325574 | CASC4        | -0.61 | 7.76  | 0.00 | 0.04 |
| ILMN_1727778 | NTNG1        | -0.59 | 6.93  | 0.00 | 0.04 |
| ILMN_1781373 | IFIH1        | 0.56  | 6.60  | 0.00 | 0.04 |
| ILMN_1758811 | IMPA1        | -0.59 | 8.32  | 0.00 | 0.04 |
| ILMN_3254984 | LOC100129759 | -0.61 | 8.42  | 0.00 | 0.04 |
| ILMN_1738579 | VHL          | 0.55  | 9.78  | 0.00 | 0.04 |
| ILMN_1657606 | ZFHX4        | 0.56  | 6.15  | 0.00 | 0.04 |
| ILMN_1692651 | PHB          | -0.61 | 9.51  | 0.00 | 0.04 |
| ILMN_2120273 | AP1S2        | -0.55 | 9.73  | 0.00 | 0.04 |
| ILMN_2336781 | SOD2         | 0.55  | 12.07 | 0.00 | 0.04 |
| ILMN_1737089 | CAPN5        | 0.69  | 8.09  | 0.00 | 0.04 |
| ILMN_1671054 | HLA-A        | 0.60  | 9.92  | 0.00 | 0.04 |
| ILMN_2086095 | ID2          | 0.76  | 9.04  | 0.00 | 0.04 |
| ILMN_1768097 | RPGR         | -0.54 | 7.31  | 0.00 | 0.04 |
| ILMN_2124187 | TSC22D2      | 0.56  | 9.05  | 0.00 | 0.04 |
| ILMN_1666364 | COQ10A       | 0.60  | 8.55  | 0.00 | 0.04 |
| ILMN_1738684 | NRXN2        | -0.54 | 7.97  | 0.00 | 0.04 |
| ILMN_1775743 | BTG1         | -0.56 | 9.64  | 0.00 | 0.04 |
| ILMN_1654851 | FAM134A      | 0.54  | 8.35  | 0.00 | 0.04 |
| ILMN_1728914 | PRUNE        | -0.57 | 6.49  | 0.00 | 0.04 |



|              |            |       |       |      |      |
|--------------|------------|-------|-------|------|------|
| ILMN_2217289 | UBE2S      | 0.54  | 5.66  | 0.00 | 0.04 |
| ILMN_2413816 | GRB14      | -0.56 | 6.79  | 0.00 | 0.04 |
| ILMN_2089329 | SPRY2      | -0.58 | 10.32 | 0.00 | 0.04 |
| ILMN_1659169 | LOC729919  | -0.56 | 6.91  | 0.00 | 0.04 |
| ILMN_1812262 | DDR1       | 0.59  | 7.81  | 0.00 | 0.04 |
| ILMN_1745116 | ABHD12     | -0.54 | 8.93  | 0.00 | 0.04 |
| ILMN_1809889 | CCDC117    | 0.56  | 8.15  | 0.00 | 0.04 |
| ILMN_2401822 | FTSJ1      | -0.56 | 9.57  | 0.00 | 0.04 |
| ILMN_2084836 | CORO2B     | -0.61 | 6.57  | 0.00 | 0.04 |
| ILMN_2375002 | MAP4K4     | -0.59 | 8.08  | 0.00 | 0.04 |
| ILMN_1701933 | SNCA       | 0.57  | 6.71  | 0.00 | 0.04 |
| ILMN_1815346 | TMEM136    | 0.55  | 8.87  | 0.00 | 0.04 |
| ILMN_1659297 | FZD6       | 0.69  | 7.98  | 0.00 | 0.04 |
| ILMN_2175447 | ZNF767     | 0.55  | 6.90  | 0.00 | 0.04 |
| ILMN_1722492 | DUSP19     | 0.55  | 10.83 | 0.00 | 0.04 |
| ILMN_1694780 | GCHFR      | 0.56  | 7.06  | 0.00 | 0.04 |
| ILMN_1716815 | CEACAM1    | 0.56  | 5.78  | 0.00 | 0.04 |
| ILMN_1765091 | ANKHD1     | 0.53  | 8.11  | 0.00 | 0.04 |
| ILMN_2329667 | MYO7B      | -0.59 | 5.74  | 0.00 | 0.04 |
| ILMN_1803231 | LOC650543  | 0.77  | 5.52  | 0.00 | 0.04 |
| ILMN_2351638 | BEX4       | -0.54 | 7.57  | 0.00 | 0.04 |
| ILMN_1670079 | OMA1       | 0.55  | 9.24  | 0.00 | 0.04 |
| ILMN_1808587 | ZFHX3      | 0.55  | 7.63  | 0.00 | 0.04 |
| ILMN_1815308 | SDC1       | -0.60 | 10.22 | 0.00 | 0.04 |
| ILMN_1701134 | PTEN       | 0.54  | 8.41  | 0.00 | 0.04 |
| ILMN_2147114 | PSPH       | -0.53 | 6.78  | 0.00 | 0.04 |
| ILMN_2363065 | RTN3       | -0.57 | 10.16 | 0.00 | 0.04 |
| ILMN_1712577 | FAM174A    | -0.59 | 7.85  | 0.00 | 0.04 |
| ILMN_1742731 | SLC35A2    | -0.53 | 10.02 | 0.00 | 0.04 |
| ILMN_3251085 | RBBP4      | 0.62  | 9.44  | 0.00 | 0.04 |
| ILMN_1723768 | NLRX1      | 0.54  | 7.39  | 0.00 | 0.04 |
| ILMN_1656621 | CHMP2A     | 0.53  | 8.51  | 0.00 | 0.04 |
| ILMN_1805992 | KIAA1598   | 0.53  | 8.79  | 0.00 | 0.04 |
| ILMN_1695640 | PTPN22     | -0.59 | 6.20  | 0.00 | 0.04 |
| ILMN_1652631 | GLIPR2     | 0.53  | 9.72  | 0.00 | 0.04 |
| ILMN_2129388 | FAM190B    | -0.58 | 7.70  | 0.00 | 0.04 |
| ILMN_1714028 | KRTAP12-3  | -0.54 | 5.44  | 0.00 | 0.05 |
| ILMN_3230631 | NCRNA00161 | -0.57 | 5.88  | 0.00 | 0.05 |
| ILMN_1661637 | TRPM8      | -0.53 | 6.15  | 0.00 | 0.05 |
| ILMN_1690464 | TMEM20     | 0.53  | 7.08  | 0.00 | 0.05 |
| ILMN_1651496 | HIST1H2BD  | 0.54  | 8.37  | 0.00 | 0.05 |
| ILMN_1746426 | TOMM70A    | -0.53 | 9.27  | 0.00 | 0.05 |
| ILMN_1706852 | CSF3       | -0.54 | 5.41  | 0.00 | 0.05 |
| ILMN_1804415 | SMAGP      | -0.55 | 9.30  | 0.00 | 0.05 |
| ILMN_1668960 | MID1IP1    | -0.54 | 8.09  | 0.00 | 0.05 |
| ILMN_1703263 | SP140      | -0.57 | 8.50  | 0.00 | 0.05 |
| ILMN_2404385 | REPIN1     | 0.58  | 11.18 | 0.00 | 0.05 |
| ILMN_2053538 | RHBDL2     | 0.57  | 7.69  | 0.00 | 0.05 |
| ILMN_2098743 | THEM2      | 0.54  | 9.35  | 0.00 | 0.05 |
| ILMN_1721563 | TMEM127    | 0.53  | 7.03  | 0.00 | 0.05 |
| ILMN_1898691 |            | 0.61  | 6.36  | 0.00 | 0.05 |
| ILMN_1812461 | WISP2      | 1.06  | 8.28  | 0.00 | 0.05 |
| ILMN_1772906 | LOC652086  | 0.60  | 5.61  | 0.00 | 0.05 |
| ILMN_1844593 |            | -0.54 | 6.47  | 0.00 | 0.05 |
| ILMN_1795128 | C13orf23   | 0.54  | 8.49  | 0.00 | 0.05 |
| ILMN_3219695 | LOC441711  | -0.55 | 6.71  | 0.00 | 0.05 |
| ILMN_1745964 | IRAK2      | -0.53 | 8.56  | 0.00 | 0.05 |
| ILMN_1717099 | DSCR3      | -0.69 | 9.49  | 0.00 | 0.05 |
| ILMN_1725312 | RASA1      | -0.53 | 9.66  | 0.00 | 0.05 |
| ILMN_1771411 | ALG6       | 0.53  | 8.11  | 0.00 | 0.05 |
| ILMN_2187058 | LOC93349   | -0.53 | 6.22  | 0.00 | 0.05 |
| ILMN_2285817 | FAM89A     | -0.53 | 8.08  | 0.00 | 0.05 |
| ILMN_1696270 | PLAG1      | 0.53  | 7.20  | 0.00 | 0.05 |
| ILMN_1686679 | ZNF462     | 0.54  | 8.21  | 0.00 | 0.05 |
| ILMN_1809483 | HSD17B14   | 0.57  | 8.57  | 0.00 | 0.05 |
| ILMN_1803423 | ARHGEF6    | -0.56 | 9.87  | 0.00 | 0.05 |
| ILMN_2334587 | HNRNPC     | -0.53 | 8.82  | 0.00 | 0.05 |
| ILMN_1672443 | QDPR       | 0.52  | 10.56 | 0.00 | 0.05 |
| ILMN_1781536 | FAH        | -0.53 | 10.08 | 0.00 | 0.05 |
| ILMN_1692267 | B4GALT3    | 0.53  | 9.39  | 0.00 | 0.05 |
| ILMN_2290998 | CCS        | 0.59  | 9.07  | 0.00 | 0.05 |
| ILMN_1761804 | ALDH9A1    | 0.52  | 12.58 | 0.00 | 0.05 |
| ILMN_1721657 | RSU1       | -0.54 | 9.06  | 0.00 | 0.05 |
| ILMN_1803818 | NMNAT2     | -0.52 | 9.06  | 0.00 | 0.05 |
| ILMN_1698259 | TMEM100    | 0.63  | 8.03  | 0.00 | 0.05 |
| ILMN_1671893 | CHMP2A     | 0.57  | 11.06 | 0.00 | 0.05 |
| ILMN_1671733 | LOC653184  | -0.54 | 6.17  | 0.00 | 0.05 |
| ILMN_1846517 |            | 0.53  | 8.06  | 0.00 | 0.05 |
| ILMN_1774077 | GBP2       | 0.57  | 8.24  | 0.00 | 0.05 |
| ILMN_1775269 | EID1       | -0.56 | 6.98  | 0.00 | 0.05 |
| ILMN_1657234 | CCL20      | -0.52 | 6.14  | 0.00 | 0.05 |
| ILMN_2371458 | CXCR7      | 0.58  | 5.74  | 0.00 | 0.05 |
| ILMN_2299612 | TMEM150A   | 0.59  | 8.57  | 0.00 | 0.05 |
| ILMN_1723522 | APOLD1     | -0.54 | 5.74  | 0.00 | 0.05 |
| ILMN_3289594 | LOC652993  | 0.57  | 5.41  | 0.00 | 0.05 |
| ILMN_1735930 | KLF2       | -0.58 | 8.19  | 0.00 | 0.05 |

## SI Table S4

### List of siRNA target sequences

| Target Gene                          | siRNA target sequences 5' – 3' |
|--------------------------------------|--------------------------------|
| <i>BCL6</i>                          | GAGAACAACCGCCACUGA             |
|                                      | GUACACAUCUCGGCUCAAU            |
|                                      | GUCGAGACAUCUUGACUGA            |
|                                      | UUACAGACCAGUUGAAAUG            |
| <i>AXL</i>                           | GAAAGAAGGAGACCCGUUA            |
|                                      | CCAAGAAGAUCUACA AUUGG          |
|                                      | GGAACUGCAUGCUGAAUGA            |
|                                      | GAAGGAGACCCGUUAUGGA            |
| <i>NCoR</i>                          | GAUCACAUCUGUCAAAUUA            |
|                                      | GAACGUGGCUCUCAAGUU             |
|                                      | GAAAGGAAAUCGACACUGA            |
|                                      | GCCCUGGGAUUUUAUGAUGA           |
| <i>BCoR</i>                          | UCGCCAACUCAGCGGGUUA            |
|                                      | GAAGUGAGAUUCCGAAAGA            |
|                                      | GCAAAGUUCUGAAACCGAA            |
|                                      | CAGCCAGUCUUCACCGUAA            |
| <i>TP53</i>                          | GAGGUUGGCUCUGACUGUA            |
|                                      | GCACAGAGGAAGAGAAUCU            |
|                                      | GAAGAAACCACUGGAUGGA            |
|                                      | GCUUCGAGAUUUUCCGAGA            |
| siGENOME Non-Targeting siRNA Pool #2 | UAAGGCUAUGAAGAGAUAC            |
|                                      | AUGUAAUUGCCUGUAUUAG            |
|                                      | AUGAACGUGAAUUGCUCAA            |
|                                      | UGGUUUACAUGUCGACUAA            |

## SI Table S5

### List of sgRNA target sequences

| Vector    | Target sequence      |
|-----------|----------------------|
| sg-BCL6-1 | GCGGTATTGCACCTTGGTGT |
| sg-BCL6-2 | GAAATCTGTGGCACCCGTTT |
| sg-BCL6-3 | TGGGGCCGTGTAGCTCGTG  |
| sg-BCL6-4 | GTACAGCCGGCCGACTTTGG |

## SI Table S6

### List of miR-E based shRNA target sequences

| Vector      | Mouse gene    | Target sequence        |
|-------------|---------------|------------------------|
| Bcl6.275    | <i>Bcl6</i>   | GACCAGTTGAAATGCAACCTTA |
| Bcl6.2673   | <i>Bcl6</i>   | ATGGCAGAGTTGTAATATATA  |
| Ctnnb1.1680 | <i>Ctnnb1</i> | ACAGGGTGCTATTCCACGACTA |
| Nf1.789     | <i>Nf1</i>    | TCCGGATGAATTTACAAAGCTA |

## SI Table S7

### List of reagents and antibodies

| Reagent/Antibody           | Company                   | Catalog         | Application |
|----------------------------|---------------------------|-----------------|-------------|
| Erlotinib                  | LC Laboratories           | E-4007          |             |
| Gefitinib                  | LC Laboratories           | G-4408          |             |
| Recombinant Human Gas6     | R&D systems               | 885-GS-050      |             |
| Recombinant Human EGF      | Life technologies         | PHG0311L        |             |
| Temozolomide               | Sigma                     | T2577           |             |
| Cisplatin                  | Sigma                     | P4394           |             |
| Doxycycline hyclate        | Sigma                     | D9891           |             |
| β-ACTIN                    | Sigma                     | clone AC-15     | WB          |
| AXL                        | Sigma                     | HPA037422       | WB, IHC     |
| AXL                        | Cell Signaling Technology | #8661           | WB          |
| AXL                        | R&D systems               | MAB8541         | IF          |
| BCL6                       | Santa Cruz                | D-8             | WB          |
| BCL6                       | Santa Cruz                | N-3             | IF          |
| BCL6                       | DAKO                      | PG-B6p          | IHC         |
| BCL6                       | Cell Signaling Technology | #5650           | ChIP        |
| p53                        | Santa Cruz                | DO-1            | WB          |
| p27                        | Santa Cruz                | C-19            | WB          |
| GAPDH                      | Cell Signaling Technology | #14C10          | WB          |
| pMEK1/2 (Ser217/221)       | Cell Signaling Technology | #9154           | WB          |
| MET                        | Cell Signaling Technology | #8198           | WB          |
| EGFR                       | Cell Signaling Technology | #4267           | WB          |
| pEGFR (Tyr1068)            | Cell Signaling Technology | #2234           | WB          |
| ROR2                       | Cell Signaling Technology | #88639          | WB          |
| pAXL(Tyr702)               | Cell Signaling Technology | #D12B2          | WB          |
| p21                        | Cell Signaling Technology | #2947           | WB          |
| pErk1/2 (Thr202/Tyr204)    | Cell Signaling Technology | #4370           | WB          |
| pAkt (Ser473)              | Cell Signaling Technology | #4060           | WB          |
| pRPS6 (Ser235/236)         | Cell Signaling Technology | #4858           | WB          |
| pS6K (Thr389)              | Cell Signaling Technology | #9205           | WB          |
| peIF4E (Ser209)            | Cell Signaling Technology | #9741           | WB          |
| p-P53 ser 15               | Cell Signaling Technology | #9284           | WB          |
| Acetyl-p53(Lys382)         | Cell Signaling Technology | #2525           | WB          |
| Cleaved Caspase-3 (Asp175) | Cell Signaling Technology | #9661           | IF          |
| NCoR                       | Genetex                   | GTX129621       | WB          |
| NCoR                       | Bethyl Laboratories       | A301-145A       | ChIP        |
| BCoR                       | Abcam                     | ab129777        | WB          |
| GFP                        | Abcam                     | ab13970         | WB, IF      |
| HA                         | Covance                   | CovanceMMS-101R | IHC         |
| FLAG                       | Sigma                     | F1804           | WB, IF      |
| Ki67                       | Vector Labs               | VP-RM04         | IF          |

## SI Table S8

### List of CHIP-qPCR primers

| Primers   | Sequence (5' - 3')             |
|-----------|--------------------------------|
| BCL6-PC-F | GCAGTGGTAAAGTCCGAAGC           |
| BCL6-PC-R | TCCGGCCTTTCTAGAACT             |
| AXL-P1-F  | ATTCTGGTCTTCAGATAAGGCGTCAG     |
| AXL-P1-R  | CAGCTCATCTCATCTCATTCTATGG      |
| AXL-P2-F  | GGAGGAGCTCACATTCTCAGCATT       |
| AXL-P2-R  | CTCCCCTTCTCATGGGACCTG          |
| AXL-P3-F  | TACATGTCTCTTATGAATGTACATCAGTGT |
| AXL-P3-R  | GATTCCAGATGTGCTTCCAGATG        |
| AXL-P4-F  | TATATGTGTGAGTCACGGTGTGTTTGTGTC |
| AXL-P4-R  | TTCCCCCTCCAGAAGGTTCTTGCTTTA    |
| AXL-P5-F  | CTGACGGAGAAAAGGAACTTTGTGTCT    |
| AXL-P5-R  | GTTTGTGTTTCTGAGCTGGTATGTTTGTG  |
| AXL-P6-F  | AATCCACCTTCACTCGAAAACAGTACTC   |
| AXL-P6-R  | CATAGGTGTAGAAATATGAGCATGTGTAAT |

## SI Table S9

### List of qRT-PCR primers

| Primers for qRT-PCR | Sequence (5' – 3')      |
|---------------------|-------------------------|
| GAPDH-F             | GTCAGTGGTGGACCTGACCT    |
| GAPDH-R             | AGGGGTCTACATGGCAACTG    |
| ACTB-F              | GACGACATGGAGAAAATCTG    |
| ACTB-R              | ATGATCTGGGTCATCTTCTC    |
| BCL6-F              | CTCAGATTCTAGCTGTGAGAACG |
| BCL6-R              | GTCACACTTGTAGGGTTTGTAC  |
| TP53-F              | AATCAACCCACAGCTGCAC     |
| TP53-R              | TCTTCTGTCCCTTCCCAGAA    |
| CDKN1B-F            | AACCGACGATTCTTCTACTC    |
| CDKN1B-R            | TGTTTACGTTTGACGTCTTC    |
| CDKN1A-F            | CCTGTCACTGTCTTGACCCT    |
| CDKN1A-R            | GCGTTTGGAGTGGTAGAAATCT  |
| AXL-F               | CATCAGACCTTCGTGTCCCA    |
| AXL-R               | GAGACCAGGTGGAGGTTACG    |
